# Supplementary material for: The contribution of rare whole genome sequencing variants to plasma protein levels and to the missing heritability
Source: Research Square preprint supplement (doi:10.21203/rs.3.rs-625433/v1), 2021-06-21
Supplement: Supplementary file 1 [file 3c21e68a0d1b15f652295e4b.xlsx]

## Sheet: Sheet1
Supplementary Table S4. SKAT results for Trans-associations
Locus No - The number of the locus. A locus is defined as a region where one or several SNV-sets are associated with the same protein.
Nr in Loci - Number of SNV-sets with significant SKAT P-values within the locus
SKAT analsyes - Associated SNV set																		Protein Information					GWAS			GWAS adjusted SKAT results
Locus No	Chr SNV-set	Most Sign Method		Start	Stop	SNV-set name		Eigen/CADD-weighted	Commonrare	Rare only	Unweighted	MAF weight - B(1,25)	MAF weight - B(1,5)	MAF weight - B(0.5,0.5)	min P	N Marker Rare	N Marker Common	Chr	Start	Stop	Gene name	Protein name	GWAS hit	GWAS signal	Conditional GWAS signal	Eigen/CADD-weighted	Commonrare	Rare only	Unweighted	MAF weight - B(1,25)	MAF weight - B(1,5)	MAF weight - B(0.5,0.5)	Multiple testing significant
167	12	Commonrare	1	23687112	23687496	SOX5	Trans-Flank	0.100447	2.12799e-10	0.000611205	0.147022	0.0359969	0.102062	0.0766744	2.12799e-10	190	197	12	65444405	65515346	WIF1	ONC2_192_WIF-1	Yes	Primary,Trans,12,rs10849032,573594,0.399,2.96e-11,12		0.260142	1.42639e-09	3.4278e-05	0.349281	0.0886826	0.333293	0.181746	Yes
113	2	Commonrare	1	242716330	242716439	GAL3ST2	Trans-CDS	1.39304e-07	3.62746e-19	9.79404e-08	1.5128e-15	2.03163e-06	8.7015e-07	1.47316e-14	3.62746e-19	5	3	19	8959519	9092018	MUC16	ONC2_191_MUC-16	Yes	Primary,Trans,2,rs62193069,242730565,0.140,4.10e-17,19		2.25588e-06	2.34027e-07	1.32981e-07	1.30678e-05	1.62753e-05	0.000407523	4.52979e-06	Yes
137	3	Commonrare	1	98451667	98451895	ST3GAL6	Trans-Flank	1.43248e-18	3.46604e-28	0.0117026	1.84607e-20	9.33985e-08	5.81844e-16	2.12322e-26	3.46604e-28	88	92	19	51628164	51639908	SIGLEC9	NEU_109_Siglec-9	Yes	Primary,Trans,3,rs10935473,98416900,0.472,1.14e-53,19		0.000226915	6.5145e-06	0.00133544	0.000204368	7.40101e-05	0.00050934	2.26303e-05	Yes
14	3	MAF weight - B(1,5)	1	16926494	16926579	PLCL2	Trans-Flank	7.8437e-07	3.76754e-12	2.72799e-05	1.73319e-05	1.60161e-06	5.41666e-14	1.10152e-10	5.41666e-14	198	169	16	57438678	57449974	CCL17	CVD2_165_CCL17	Yes	Primary,Trans,3,rs2228467,42906116,0.070,5.92e-11,16	Conditional 1,Trans,3,rs115792481,16940157,0.091,1.86e-10,16	0.00107125	9.31346e-06	0.000126128	0.00124296	0.00212292	0.000393939	9.82413e-05	Yes
140	12	Commonrare	1	102140901	102141059	GNPTAB	Trans-Flank	2.691e-08	5.14568e-16	6.16349e-05	1.46388e-07	0.0689583	3.3339e-05	3.65609e-07	5.14568e-16	125	169	11	6411660	6416228	SMPD1	NEU_125_SMPD1	Yes	Primary,Trans,12,rs4764809,102096012,0.482,3.81e-10,11		0.0511578	3.82654e-05	0.000298343	0.041209	0.0441262	0.0378846	0.0137533	Yes
50	3	Commonrare	1	98250837	98252000	GPR15	Trans-Flank	1.62324e-19	4.84672e-36	1.30892e-05	9.53968e-18	6.25723e-14	1.01382e-21	4.58822e-23	4.84672e-36	117	131	17	62079953	62097994	ICAM2	CVD3_188_ICAM-2	Yes	Primary,Trans,3,rs11927405,98402969,0.471,1.64e-51,17		0.229177	7.13212e-05	0.011716	0.412447	0.082482	0.150558	0.204513	Yes
143	6	Commonrare	1	31237227	31237342	HLA-B	Trans-CDS	1.10687e-14	2.34997e-16	0.00442411	3.94195e-14	0.00399895	1.16983e-12	1.67433e-14	2.34997e-16	12	45	9	27109138	27230173	TEK	CVD2_122_TIE2	Yes	Primary,Trans,6,rs34277309,31329245,0.284,1.19e-17,9		0.0233931	0.000157345	0.00912364	0.014946	0.014826	0.0112832	0.0104288	Yes
45	1	Commonrare	1	109656765	109656998	KIAA1324	Trans-Flank	2.42326e-28	2.07133e-39	2.13052e-05	1.23351e-27	2.28237e-06	2.49301e-24	1.62084e-31	2.07133e-39	202	208	17	42422453	42430470	GRN	CVD3_118_GRN	Yes	Primary,Trans,1,rs12740374,109817590,0.216,3.26e-42,17		0.00137168	0.000976083	0.0118519	0.00865684	0.100297	0.00960091	0.0108981
1	5	Commonrare	1	176829252	176829500	F12	Trans-CDS	6.15505e-09	4.88171e-11	0.00029048	4.54451e-08	0.0657366	6.34838e-05	5.86608e-08	4.88171e-11	2	5	11	130318868	130346536	ADAMTS15	ONC2_185_ADAM-TS-15	Yes	Primary,Trans,5,rs1801020,176836532,0.364,5.28e-10,11	Conditional 1,Trans,5,rs6870137,81083081,0.109,7.90e-09,11	0.40473	0.00134891	0.0010753	0.560008	0.400617	0.620388	0.31294
15	3	Commonrare	1	42905954	42906408	ACKR2	Trans-CDS	1.36296e-10	3.85469e-15	0.00244039	2.05984e-10	8.26085e-09	2.77157e-10	1.31113e-10	3.85469e-15	1	2	16	57438678	57449974	CCL17	CVD2_165_CCL17	Yes	Primary,Trans,3,rs2228467,42906116,0.070,5.92e-11,16	Conditional 1,Trans,3,rs115792481,16940157,0.091,1.86e-10,16	0.00595819	0.00706004	0.00162158	0.0828843	0.0093743	0.0580672	0.00829214
6	1	Unweighted	1	159174709	159174810	ACKR1	Trans-CDS	1.39369e-06	3.45515e-41	0.623173	1.91471e-47	5.8679e-06	1.57042e-21	6.81586e-47	1.91471e-47	1	4	17	32683470	32685629	CCL13	INF_136_MCP-4	Yes	Primary,Trans,1,rs12075,159175354,0.472,1.41e-54,17		0.00235134	0.0110288	0.863687	0.00537817	0.439351	0.00821997	0.0251241
48	6	Commonrare	1	31496751	31497002	MCCD1	Trans-CDS	2.44016e-07	8.86186e-11	0.0212198	2.34576e-07	0.038021	1.49657e-07	3.76912e-08	8.86186e-11	6	6	5	54398475	54406080	GZMA	NEU_157_GZMA	Yes	Primary,Trans,6,6:31101250,31101250,0.128,5.26e-09,5		0.178399	0.00255953	0.00293218	0.172977	0.0135516	0.0837356	0.0560223
40	3	Commonrare	1	98451667	98451895	ST3GAL6	Trans-Flank	2.71347e-12	7.25407e-22	0.00842681	1.38424e-13	8.45445e-06	6.61693e-13	1.48596e-17	7.25407e-22	87	92	5	180028505	180076624	FLT4	ONC2_190_VEGFR-3	Yes	Primary,Trans,3,rs10935473,98416900,0.472,2.26e-38,5		0.00365173	0.0196503	0.141061	0.00304539	0.354341	0.0538504	0.013629
136	3	Commonrare	1	75986604	75986793	ROBO2	Trans-Flank	0.0138685	5.03726e-11	2.12996e-05	0.00925437	0.0751317	0.021489	0.015538	5.03726e-11	246	268	19	51628164	51639908	SIGLEC9	NEU_109_Siglec-9	Yes	Primary,Trans,3,rs10935473,98416900,0.472,1.14e-53,19		0.85764	0.00427785	0.0159999	0.896506	0.677821	0.89458	0.892583
57	5	Commonrare	1	158743652	158743864	IL12B	Trans-Flank	1.39062e-21	2.07421e-42	0.000225879	3.45756e-21	1.78297e-05	2.34655e-28	1.72843e-28	2.07421e-42	62	58	3	159706536	159713806	IL12A	NEU_186_IL-12B	Yes	Primary,Trans,5,rs6556416,158818745,0.264,1.64e-33,3		0.223596	0.0114791	0.0169629	0.202445	0.00758887	0.0856332	0.00582032
27	9	MAF weight - B(1,5)	1	136080675	136080836	OBP2B	Trans-Flank	4.89096e-24	7.05525e-44	0.0211842	3.03806e-31	1.71585e-10	6.86247e-48	1.14295e-40	6.86247e-48	208	329	16	66400524	66438689	CDH5	CVD3_127_CDH5	Yes	Primary,Trans,9,rs77693339,136128558,0.096,2.9e-56,16		0.0872929	0.00941882	0.497142	0.0104629	0.257837	0.00679452	0.0198922
115	5	Commonrare	1	176829252	176829500	F12	Trans-CDS	2.03836e-13	2.6673e-17	5.28314e-05	5.05638e-13	0.00800833	1.00887e-06	4.30293e-14	2.6673e-17	2	5	2	206546713	206662857	NRP2	NEU_102_NRP2	Yes	Primary,Trans,5,rs2545801,176841339,0.328,1.28e-14,2		0.144355	0.0423432	0.00892545	0.220543	0.587903	0.830663	0.38121
17	19	Commonrare	1	49253400	49254578	FUT1	Trans-Flank	1.59893e-06	3.4644e-11	0.000215301	7.12058e-06	0.0494793	0.000254052	1.14337e-05	3.4644e-11	138	150	19	8117650	8127534	CCL25	INF_185_CCL25	Yes	Primary,Trans,19,rs679574,49206108,0.285,1.27e-08,19		0.716664	0.019175	0.0405569	0.562137	0.371493	0.357944	0.542288
144	9	MAF weight - B(1,5)	1	136130948	136131097	ABO	Trans-CDS	3.03849e-12	2.52235e-17	0.00371168	1.72564e-07	4.13793e-06	8.62002e-18	1.70085e-13	8.62002e-18	10	25	9	27109138	27230173	TEK	CVD2_122_TIE2	Yes	Primary,Trans,9,rs77693339,136128558,0.094,4.56e-20,9		0.786106	0.0781292	0.0305397	0.802144	0.0251607	0.4448	0.274606
37	13	Eigen/CADD-weighted	1	103698442	103698650	SLC10A2	Trans-CDS	8.62961e-19	1.32465e-08	0.869152	0.0010374	0.00427251	2.27479e-07	0.000350471	8.62961e-19	8	6	2	47572296	47614740	EPCAM	CVD3_152_Ep-CAM	Yes	Primary,Trans,13,rs56398830,103701690,0.052,2.27e-18,2		0.0308625	0.24799	0.514651	0.185797	0.368302	0.383393	0.267361
30	12	Commonrare	1	102140901	102141059	GNPTAB	Trans-Flank	5.57341e-13	1.10051e-17	0.000873004	8.63136e-12	0.00438571	2.75346e-11	2.46192e-13	1.10051e-17	128	167	20	57570239	57582302	CTSZ	CVD3_185_CTSZ	Yes	Primary,Trans,12,rs975431,102185145,0.217,7.48e-22,20		0.0807171	0.0472627	0.0496279	0.0455783	0.273069	0.132729	0.153996
26	14	MAF weight - B(0.5,0.5)	1	103566516	103566990	EXOC3L4	Trans-CDS	1.78712e-14	7.68851e-15	0.0828168	3.92521e-14	0.136078	5.53714e-14	1.87552e-16	1.87552e-16	15	12	1	160510884	160549306	CD84	CVD2_144_CD84	Yes	Primary,Trans,14,rs7150997,103571874,0.226,3.99e-14,1		0.295868	0.454366	0.63017	0.465254	0.622958	0.644486	0.0657705
120	19	Commonrare	1	49206173	49206913	FUT2	Trans-CDS	1.33457e-13	6.31625e-16	0.00988734	3.23761e-12	0.0324779	1.44073e-13	5.86895e-13	6.31625e-16	4	7	16	2762418	2770552	PRSS27	CVD2_121_PRSS27	Yes	Primary,Trans,19,rs679574,49206108,0.282,1.44e-14,16		0.659032	0.0669701	0.133153	0.616513	0.350252	0.286179	0.579493
29	9	Commonrare	1	136028923	136029688	GBGT1	Trans-Flank	1.5831e-06	1.24991e-13	0.0410516	2.48815e-09	0.000376808	2.08668e-13	9.56558e-12	1.24991e-13	254	320	1	15764934	15775737	CTRC	CVD2_138_CTRC	Yes	Primary,Trans,9,rs77693339,136128558,0.094,1.57e-15,1		0.175181	0.068219	0.26961	0.213514	0.153016	0.0841658	0.0753453
52	9	MAF weight - B(1,5)	1	136325148	136325349	CACFD1	Trans-CDS	0.0029086	5.95099e-13	0.322257	7.08672e-10	0.00503344	1.27869e-20	2.73815e-13	1.27869e-20	5	3	17	62079953	62097994	ICAM2	CVD3_188_ICAM-2	Yes	Primary,Trans,9,9:136138765,136138765,0.151,3.83e-44,17		0.400577	0.244105	0.205033	0.436669	0.0955698	0.688998	0.0697754
153	19	Unweighted	1	44150568	44150740	PLAUR	Trans-CDS	9.75785e-76	1.74236e-56	0.10688	1.63716e-78	0.00696959	5.27826e-73	9.42807e-61	1.63716e-78	5	4	8	22941867	22974950	TNFRSF10C	CVD3_134_TNFRSF10C	Yes	Primary,Trans,19,rs4760,44153100,0.139,6.49e-90,8		0.0737445	0.322634	0.202947	0.105526	0.183231	0.12707	0.22471
132	9	MAF weight - B(1,5)	1	136325148	136325349	CACFD1	Trans-CDS	9.55231e-07	6.24225e-22	0.36697	8.03565e-15	0.000201984	1.76557e-31	2.3886e-20	1.76557e-31	5	3	1	169691781	169733846	SELE	CVD3_136_SELE	Yes	Primary,Trans,9,9:136141870,136141870,0.151,7.35e-68,1		0.423852	0.566056	0.58521	0.440108	0.335102	0.121541	0.364238
35	10	Commonrare	1	64927764	64927934	JMJD1C	Trans-Flank	7.42459e-13	5.66031e-19	0.0014295	7.0476e-13	0.0464411	4.50792e-07	6.60416e-13	5.66031e-19	215	211	4	74861358	74864496	CXCL5	INF_154_CXCL5	Yes	Primary,Trans,10,rs7088799,65016174,0.444,2.82e-14,4		0.520957	0.167048	0.357482	0.447071	0.169026	0.245207	0.162753
103	3	Commonrare	1	52867405	52867486	TMEM110-MUSTN1	Trans-Flank	3.25467e-41	2.8962e-58	0.000501031	4.5062e-42	1.36916e-05	1.80491e-15	6.20383e-47	2.8962e-58	118	116	3	154741912	154901518	MME	NEU_143_NEP	Yes	Primary,Trans,3,rs35004449,52852897,0.369,2.54e-55,3		0.230913	0.373606	0.601994	0.227659	0.290964	0.257174	0.172817
119	9	Commonrare	1	136130948	136131097	ABO	Trans-Flank	3.86697e-08	1.83829e-14	0.0360206	5.10453e-10	0.000851012	9.79477e-11	5.6098e-11	1.83829e-14	221	331	7	131185020	131242976	PODXL	ONC2_127_PODXL	Yes	Primary,Trans,9,9:136141870,136141870,0.155,1.67e-28,7		0.224149	0.41683	0.850683	0.321945	0.376623	0.283101	0.587115
18	3	Commonrare	1	46414353	46415492	CCR5	Trans-CDS	1.84539e-38	8.67311e-55	0.0206152	1.21754e-38	0.503175	2.6709e-39	2.78501e-27	8.67311e-55	6	1	17	34430982	34433014	CCL4	INF_130_CCL4	Yes	Primary,Trans,3,rs113341849,46384204,0.234,3.16e-44,17		0.810175	0.239167	0.239167	0.70837	0.768923	0.716815	0.847195
75	9	Eigen/CADD-weighted	1	136130948	136131097	ABO	Trans-CDS	5.13658e-13	4.39997e-06	0.065378	3.03758e-06	0.0124678	1.63755e-05	2.44501e-06	5.13658e-13	10	25	19	39292310	39304004	LGALS4	CVD3_168_Gal-4	Yes	Primary,Trans,9,9:136146431,136146431,0.422,3.94e-15,19		0.427664	0.691984	0.632258	0.319463	0.716917	0.515645	0.5745
38	13	Eigen/CADD-weighted	1	103698442	103698650	SLC10A2	Trans-CDS	5.76735e-11	0.000110052	0.828307	0.00760663	0.0327095	0.000240413	0.00913178	5.76735e-11	8	6	1	94994780	95007356	F3	CVD2_123_TF	Yes	Primary,Trans,13,rs56398830,103701690,0.052,8.15e-11,1		0.323996	0.433364	0.631831	0.732183	0.441695	0.522253	0.515637
118	9	MAF weight - B(1,5)	1	136130948	136131097	ABO	Trans-Flank	3.14694e-15	1.39186e-19	0.103436	4.91489e-15	0.00229844	1.72294e-20	7.68302e-18	1.72294e-20	225	331	17	62399864	62491136	PECAM1	CVD3_194_PECAM-1	Yes	Primary,Trans,9,9:136151579,136151579,0.151,7.87e-28,17	Conditional 1,Trans,9,rs77693339,136128558,0.096,6.80e-13,17	0.525004	0.350305	0.353614	0.43317	0.812753	0.631011	0.770638
16	6	Eigen/CADD-weighted	1	32361705	32361874	BTNL2	Trans-CDS	1.92755e-14	3.84575e-09	1	4.91944e-10	0.557429	7.24751e-09	3.09877e-08	1.92755e-14	3	33	9	34689563	34691274	CCL19	INF_145_CCL19	Yes	Primary,Trans,6,6:32668773,32668773,0.158,5.22e-20,9		0.638454	0.839308	1	0.500491	0.997708	0.549686	0.601624
22	15	Rare only	1	66791704	66792030	RPL4	Trans-Flank	0.221431	3.26746e-06	4.64889e-10	0.15561	0.0924634	0.17992	0.119229	4.64889e-10	84	128	12	6554032	6560884	CD27	ONC2_153_CD27	No
47	17	Commonrare	1	7623012	7623258	DNAH2	Trans-Flank	0.313254	4.63802e-10	3.86492e-08	0.350197	0.039497	0.188755	0.0979811	4.63802e-10	236	235	17	42422453	42430470	GRN	CVD3_118_GRN	Other chromosome
134	3	Rare only	1	57743338	57743616	SLMAP	Trans-Flank	0.0542446	3.08872e-07	4.55462e-10	0.0687712	0.0114754	0.1533	0.0238959	4.55462e-10	149	145	1	169558086	169599431	SELP	CVD3_113_SELP	No
141	14	Commonrare	1	81728085	81728315	STON2	Trans-Flank	0.139874	4.28043e-10	8.67228e-05	0.0863304	0.0902059	0.111074	0.0584444	4.28043e-10	151	129	11	6411660	6416228	SMPD1	NEU_125_SMPD1	Other chromosome
70	15	Commonrare	1	74738390	74738608	UBL7	Trans-Flank	0.0224859	4.21661e-10	0.00019022	0.0163159	0.00137716	0.00293173	0.00208056	4.21661e-10	198	139	19	51559462	51568371	KLK13	ONC2_105_KLK13	No
133	3	Commonrare	1	38738799	38740093	SCN10A	Trans-Flank	0.148873	4.05922e-10	2.8864e-08	0.149795	0.0395685	0.0202987	0.0166132	4.05922e-10	98	121	1	169558086	169599431	SELP	CVD3_113_SELP	No
104	2	Rare only	1	198318244	198318428	COQ10B	Trans-CDS	0.359143	4.37459e-09	3.99588e-10	0.227163	0.000416963	0.103142	0.00122362	3.99588e-10	4	3	11	102706531	102714534	MMP3	CVD3_186_MMP-3	No
69	11	Commonrare	1	128564113	128564211	FLI1	Trans-Flank	0.00147654	3.93379e-10	0.0164634	0.000881097	0.311497	0.00817713	0.00187667	3.93379e-10	217	271	12	88886569	88974628	KITLG	CVD2_132_SCF	No
55	19	Commonrare	1	868060	868291	MED16	Trans-Flank	0.0553771	3.80197e-10	1.35262e-06	0.0182891	0.000634378	0.0114473	0.00214479	3.80197e-10	474	433	17	62079953	62097994	ICAM2	CVD3_188_ICAM-2	Other chromosome
131	8	Commonrare	1	139601455	139601723	COL22A1	Trans-Flank	0.00126892	3.49923e-10	0.023501	0.000685126	0.184272	0.0126297	0.00655202	3.49923e-10	103	92	1	169691781	169733846	SELE	CVD3_136_SELE	Other chromosome
126	7	Commonrare	1	129906681	129906832	CPA2	Trans-Flank	0.0299929	3.47719e-10	6.25741e-05	0.0186658	0.211008	0.0205915	0.0145972	3.47719e-10	107	118	6	127439748	127518910	RSPO3	ONC2_187_RSPO3	No
73	7	Rare only	1	102105487	102105647	LRWD1	Trans-CDS	0.104398	2.01856e-07	3.42476e-10	0.0498477	0.00017909	0.0944726	0.0477462	3.42476e-10	12	11	19	51499262	51505967	KLK8	ONC2_124_hK8	No
64	13	Commonrare	1	96454003	96454106	UGGT2	Trans-Flank	0.00221988	3.39899e-10	0.000109431	0.0076105	0.00475929	0.00275277	0.00189885	3.39899e-10	116	102	2	102681003	102796334	IL1R1	CVD3_155_IL-1RT1	No
10	12	Commonrare	1	129558379	129559644	TMEM132D	Trans-Flank	0.0504462	3.3658e-10	0.000454407	0.0324902	0.0833804	0.180665	0.151117	3.3658e-10	117	144	17	34303528	34308532	CCL16	CVD3_196_CCL16	No
152	5	Commonrare	1	79615994	79616777	SPZ1	Trans-CDS	0.00552946	3.32045e-10	1.80425e-07	0.0645761	0.00146365	0.0199103	0.00182765	3.32045e-10	2	3	8	23047964	23082639	TNFRSF10A	CVD2_114_TNFRSF10A	No
79	11	Rare only	1	36594814	36597683	RAG1	Trans-CDS	0.188518	2.25776e-07	3.18202e-10	0.554075	0.002687	0.12052	0.0570259	3.18202e-10	8	4	1	160765863	160798051	LY9	ONC2_116_LY9	No
32	10	Rare only	1	21074635	21074892	NEBL	Trans-Flank	0.0891996	1.42666e-07	3.12837e-10	0.0836284	0.253344	0.189652	0.216294	3.12837e-10	176	139	4	76942269	76944650	CXCL10	INF_169_CXCL10	No
83	2	Commonrare	1	45879199	45879627	PRKCE	Trans-Flank	0.609884	3.07735e-10	5.30741e-05	0.560839	0.688297	0.794785	0.754446	3.07735e-10	374	521	19	43964938	43969812	LYPD3	ONC2_126_LYPD3	No
72	6	Rare only	1	136878855	136878996	MAP3K5	Trans-CDS	0.908437	2.98234e-06	3.05272e-10	0.691592	0.0870857	0.114316	0.420632	3.05272e-10	10	7	19	51499262	51505967	KLK8	ONC2_124_hK8	No
23	17	Rare only	1	18178075	18178231	TOP3A	Trans-CDS	0.237935	4.5589e-07	3.01599e-10	0.273116	3.44997e-05	0.0685914	0.00650914	3.01599e-10	10	6	12	6554032	6560884	CD27	ONC2_153_CD27	No
145	13	Commonrare	1	100258909	100259051	CLYBL	Trans-Flank	0.0128155	2.99616e-10	2.44801e-05	0.0074868	0.0700934	0.0537493	0.00501027	2.99616e-10	283	316	9	27109138	27230173	TEK	CVD2_122_TIE2	Other chromosome
77	14	Commonrare	1	58471413	58471562	C14orf37	Trans-Flank	0.0224097	2.94589e-10	0.00401907	0.0166886	0.0333546	0.024671	0.00376895	2.94589e-10	78	81	1	236681299	236716281	LGALS8	NEU_140_gal-8	No
151	13	Commonrare	1	92051260	92051503	GPC5	Trans-Flank	0.00427624	2.93309e-10	4.57737e-05	0.0127366	0.0313093	0.0238889	0.0386195	2.93309e-10	283	283	11	113558271	113577095	TMPRSS5	NEU_149_TMPRSS5	No
66	10	Commonrare	1	19337827	19338106	MALRD1	Trans-Flank	0.0389434	2.91263e-10	0.000450776	0.025376	0.439503	0.0447291	0.0530514	2.91263e-10	137	186	3	3108009	3168297	IL5RA	NEU_172_IL-5R-alpha	No
31	15	Commonrare	1	84904546	84904710	GOLGA6L4	Trans-Flank	0.00539787	2.77221e-10	1.3431e-06	0.00732067	0.00284391	0.00387825	0.00251034	2.77221e-10	15	26	20	57570239	57582302	CTSZ	CVD3_185_CTSZ	Other chromosome
56	19	Rare only	1	17970725	17970823	RPL18A	Trans-Flank	0.982769	1.49751e-06	2.63464e-10	0.957655	0.378928	0.866708	0.683168	2.63464e-10	132	155	17	62079953	62097994	ICAM2	CVD3_188_ICAM-2	Other chromosome
42	4	Commonrare	1	149002454	149002690	NR3C2	Trans-Flank	0.0408485	2.61626e-10	2.00773e-06	0.0401848	0.0121558	0.0524712	0.0167711	2.61626e-10	133	124	7	23275585	23314727	GPNMB	ONC2_149_GPNMB	No
114	16	Rare only	1	819387	819673	MSLNL	Trans-CDS	0.0185816	1.26888e-09	2.56201e-10	0.0178204	5.56983e-08	1.41897e-05	6.6417e-08	2.56201e-10	26	11	19	8959519	9092018	MUC16	ONC2_191_MUC-16	Other chromosome
7	5	Commonrare	1	177665658	177665741	COL23A1	Trans-Flank	0.0562293	2.45585e-10	1.55045e-05	0.0506084	0.0299105	0.110082	0.0741894	2.45585e-10	320	450	17	34303528	34308532	CCL16	CVD3_196_CCL16	No
159	15	Commonrare	1	26792899	26793321	GABRB3	Trans-Flank	0.215493	2.44127e-10	7.66614e-06	0.191907	0.0503039	0.0867556	0.106337	2.44127e-10	92	138	1	175284329	175712906	TNR	NEU_193_TN-R	No
85	2	Commonrare	1	240834595	240834771	NDUFA10	Trans-Flank	1.67735e-05	2.37125e-10	0.127368	4.24372e-05	0.0602104	0.000823801	6.48855e-05	2.37125e-10	92	119	19	43964938	43969812	LYPD3	ONC2_126_LYPD3	No
123	2	Commonrare	1	200797749	200798086	TYW5	Trans-Flank	0.00677125	2.35367e-10	2.22259e-05	0.0073762	0.206617	0.00999036	0.00275668	2.35367e-10	86	73	6	127439748	127518910	RSPO3	ONC2_187_RSPO3	No
125	4	Commonrare	1	41362817	41362993	LIMCH1	Trans-Flank	0.0998983	2.35336e-10	0.00904177	0.0933264	0.0210987	0.0181267	0.037001	2.35336e-10	157	209	6	127439748	127518910	RSPO3	ONC2_187_RSPO3	No
170	1	Commonrare	1	109358752	109358964	AKNAD1	Trans-Flank	0.0304799	2.34333e-10	0.00106826	0.0342975	0.312459	0.219243	0.0598207	2.34333e-10	77	105	8	134203281	134242587	WISP1	ONC2_174_WISP-1	Other chromosome
9	7	Rare only	1	99564585	99564949	AZGP1	Trans-Flank	0.846644	1.56066e-05	2.3371e-10	0.925946	0.192824	0.604801	0.702103	2.3371e-10	72	47	17	34303528	34308532	CCL16	CVD3_196_CCL16	No
94	11	Commonrare	1	5775930	5776976	OR52N4	Trans-Flank	0.116036	2.33549e-10	1.43465e-08	0.0812053	0.0937845	0.0252236	0.0439582	2.33549e-10	51	110	19	43964938	43969812	LYPD3	ONC2_126_LYPD3	No
171	8	Commonrare	1	101586052	101586228	SNX31	Trans-Flank	0.0085817	2.30423e-10	0.0247027	0.0048981	0.0175915	0.000431151	0.000630685	2.30423e-10	123	166	8	134203281	134242587	WISP1	ONC2_174_WISP-1	Yes - Rare	Primary,Trans,8,rs150402210,136541703,0.010,4.19e-09,8
89	7	Commonrare	1	31732015	31732177	PPP1R17	Trans-Flank	0.0224245	2.25996e-10	5.06427e-07	0.0233477	0.157997	0.0527715	0.00946127	2.25996e-10	49	67	19	43964938	43969812	LYPD3	ONC2_126_LYPD3	No
88	7	Commonrare	1	193159	193844	FAM20C	Trans-Flank	0.357543	2.07816e-10	0.000274715	0.310944	0.228698	0.493305	0.448114	2.07816e-10	475	680	19	43964938	43969812	LYPD3	ONC2_126_LYPD3	No
124	3	Commonrare	1	174577157	174577280	NAALADL2	Trans-Flank	0.0286257	1.98578e-10	1.33208e-07	0.0348793	0.013512	0.0656765	0.0128902	1.98578e-10	194	227	6	127439748	127518910	RSPO3	ONC2_187_RSPO3	No
4	7	Commonrare	1	81579667	81579864	CACNA2D1	Trans-Flank	0.00333196	1.65796e-10	0.0341376	0.00304183	0.0188592	0.00528614	0.00129535	1.65796e-10	175	211	1	159141398	159173103	CADM3	NEU_105_CADM3	Other chromosome
87	4	Commonrare	1	110635492	110635691	PLA2G12A	Trans-Flank	0.32068	1.62602e-10	0.000367084	0.296025	0.128733	0.136499	0.288368	1.62602e-10	72	85	19	43964938	43969812	LYPD3	ONC2_126_LYPD3	No
74	12	Commonrare	1	112451229	112451453	ERP29	Trans-CDS	0.0307195	1.50524e-10	0.0102378	0.000231713	0.00767042	0.000229296	0.00277589	1.50524e-10	4	1	11	111411004	111432470	LAYN	NEU_142_LAYN	No
34	22	Rare only	1	50639425	50640059	SELENOO	Trans-Flank	0.881585	4.02175e-08	1.47927e-10	0.897736	0.0129037	0.505594	0.387128	1.47927e-10	435	429	4	76942269	76944650	CXCL10	INF_169_CXCL10	No
67	10	Commonrare	1	52751098	52751444	PRKG1	Trans-Flank	0.486285	1.47742e-10	2.92196e-06	0.458046	0.134664	0.351993	0.243901	1.47742e-10	280	391	3	3108009	3168297	IL5RA	NEU_172_IL-5R-alpha	No
155	8	Rare only	1	67860245	67860439	TCF24	Trans-Flank	0.00100811	1.07599e-07	1.45995e-10	0.000781244	0.000311377	0.000575248	0.000345936	1.45995e-10	71	55	20	62328020	62330037	TNFRSF6B	ONC2_110_TNFRSF6B	No
157	10	Commonrare	1	38385505	38385600	ZNF37A	Trans-Flank	0.0612611	1.4409e-10	0.00370051	0.0618463	0.343228	0.0884722	0.0608244	1.4409e-10	53	64	1	175284329	175712906	TNR	NEU_193_TN-R	No
168	19	Commonrare	1	36727302	36728261	ZNF146	Trans-CDS	1.05814e-05	1.39365e-10	NA	1.05814e-05	1.05814e-05	1.05814e-05	1.05814e-05	1.39365e-10	0	1	12	65444405	65515346	WIF1	ONC2_192_WIF-1	Other chromosome
100	2	Commonrare	1	45879199	45879627	PRKCE	Trans-Flank	0.0406443	1.37644e-10	0.00046948	0.020291	0.546421	0.136413	0.0738218	1.37644e-10	382	520	6	37598454	37667082	MDGA1	NEU_171_MDGA1	No
128	9	Commonrare	1	73150304	73150407	TRPM3	Trans-Flank	0.0278324	1.30472e-10	0.000531805	0.0270001	0.00237364	0.0024907	0.00416781	1.30472e-10	259	283	6	127439748	127518910	RSPO3	ONC2_187_RSPO3	No
58	7	Rare only	1	100064541	100064831	TSC22D4	Trans-Flank	0.544475	2.44169e-05	1.18689e-10	0.529107	0.00393161	0.295389	0.203157	1.18689e-10	166	95	22	17565843	17596584	IL17RA	CVD3_105_IL-17RA	Other chromosome
43	7	Rare only	1	45902643	45902810	AC096582.1	Trans-Flank	0.68729	8.99562e-09	1.10477e-10	0.560659	0.000356435	0.0768675	0.0773802	1.10477e-10	40	61	7	23275585	23314727	GPNMB	ONC2_149_GPNMB	No
81	22	Commonrare	1	19136463	19136648	GSC2	Trans-Flank	0.0511131	1.05823e-10	0.000778111	0.0237336	0.558009	0.0964512	0.0343526	1.05823e-10	187	212	1	160765863	160798051	LY9	ONC2_116_LY9	No
108	14	Commonrare	1	77941897	77942495	ISM2	Trans-CDS	0.00970727	1.00557e-10	0.0507828	0.000464484	0.136968	0.000310693	0.000605699	1.00557e-10	4	4	8	15965386	16424999	MSR1	NEU_126_MSR1	No
154	1	Commonrare	1	223116125	223116714	DISP1	Trans-Flank	0.00152358	9.57426e-11	2.60804e-06	0.00107529	0.0497297	0.000267286	0.000398887	9.57426e-11	84	118	20	62328020	62330037	TNFRSF6B	ONC2_110_TNFRSF6B	No
121	7	Commonrare	1	150437932	150438055	GIMAP5	Trans-Flank	0.0127463	9.47528e-11	0.000455481	0.0139279	0.253559	0.164635	0.0259373	9.47528e-11	81	112	15	55903743	56035288	PRTG	NEU_117_PRTG	No
149	3	Commonrare	1	138329759	138329919	FAIM	Trans-Flank	0.00100418	9.33006e-11	0.00763272	0.00103471	0.642332	0.0232507	0.00262659	9.33006e-11	44	43	11	113558271	113577095	TMPRSS5	NEU_149_TMPRSS5	No
63	12	Commonrare	1	132312999	132313238	MMP17	Trans-Flank	0.0532654	9.26823e-11	0.000348708	0.0669718	0.0379011	0.0463432	0.0326965	9.26823e-11	236	194	2	102681003	102796334	IL1R1	CVD3_155_IL-1RT1	No
112	18	Commonrare	1	34833733	34833941	CELF4	Trans-Flank	0.0680178	8.90451e-11	1.62872e-05	0.0590863	0.0662391	0.073894	0.0220112	8.90451e-11	392	340	8	15965386	16424999	MSR1	NEU_126_MSR1	No
80	17	Rare only	1	9801371	9801561	RCVRN	Trans-Flank	0.198092	2.38939e-07	8.68052e-11	0.207694	0.127399	0.371387	0.188882	8.68052e-11	75	142	1	160765863	160798051	LY9	ONC2_116_LY9	No
62	7	Commonrare	1	8008941	8009478	GLCCI1	Trans-Flank	0.0452314	8.6711e-11	4.64156e-05	0.0382404	0.242107	0.118818	0.0683112	8.6711e-11	206	293	2	102681003	102796334	IL1R1	CVD3_155_IL-1RT1	No
12	18	Commonrare	1	65178166	65181915	DSEL	Trans-CDS	0.00375546	8.57465e-11	0.416605	0.00211468	0.0706432	0.0266225	0.0154084	8.57465e-11	4	3	17	34303528	34308532	CCL16	CVD3_196_CCL16	No
24	1	Commonrare	1	220603245	220603410	AC096644.1	Trans-Flank	0.0224004	8.54658e-11	1.3126e-07	0.0144379	0.000768672	0.000444623	0.000369651	8.54658e-11	78	60	17	72537246	72542282	CD300C	NEU_110_CLM-6	No
76	12	Commonrare	1	52679998	52680114	KRT81	Trans-Flank	0.0280276	8.3099e-11	4.37934e-06	0.0206456	0.101902	0.0792834	0.0147483	8.3099e-11	222	418	1	236681299	236716281	LGALS8	NEU_140_gal-8	No
5	19	Commonrare	1	43716570	43716667	PSG9	Trans-Flank	0.000560105	8.08647e-11	7.3368e-05	0.000561959	0.0356879	0.0073949	0.000611834	8.08647e-11	49	78	1	159141398	159173103	CADM3	NEU_105_CADM3	Other chromosome
53	10	Commonrare	1	1087086	1087484	IDI1	Trans-CDS	1.92331e-06	7.95546e-11	0.0270507	1.32049e-05	9.12742e-06	1.13545e-05	5.56583e-05	7.95546e-11	3	2	17	62079953	62097994	ICAM2	CVD3_188_ICAM-2	Other chromosome
2	1	Commonrare	1	220921833	220922185	MARCH2	Trans-Flank	0.0386205	7.19713e-11	3.06176e-07	0.022942	7.17613e-05	0.00308929	0.000253483	7.19713e-11	105	89	1	159141398	159173103	CADM3	NEU_105_CADM3	Other chromosome
109	16	Commonrare	1	18794290	18794464	RPS15A	Trans-Flank	0.00218534	6.8536e-11	0.000745153	0.00258375	0.000313153	0.000438979	0.000103161	6.8536e-11	37	31	8	15965386	16424999	MSR1	NEU_126_MSR1	No
11	16	Commonrare	1	6069859	6069942	RBFOX1	Trans-Flank	0.480342	6.80556e-11	0.00207623	0.437776	0.596564	0.411981	0.468957	6.80556e-11	675	652	17	34303528	34308532	CCL16	CVD3_196_CCL16	No
21	5	Rare only	1	148383260	148383445	SH3TC2	Trans-CDS	0.00149899	4.83628e-07	6.3034e-11	0.57118	4.54032e-05	0.033248	0.000977124	6.3034e-11	13	4	12	6554032	6560884	CD27	ONC2_153_CD27	No
51	5	Commonrare	1	125936614	125936790	PHAX	Trans-Flank	0.0278633	6.28552e-11	1.76785e-06	0.0253072	0.0217091	0.0535165	0.0120495	6.28552e-11	87	91	17	62079953	62097994	ICAM2	CVD3_188_ICAM-2	Other chromosome
92	10	Commonrare	1	13688892	13689075	FRMD4A	Trans-Flank	0.719064	6.00822e-11	4.82043e-06	0.665775	0.246707	0.381984	0.493621	6.00822e-11	338	410	19	43964938	43969812	LYPD3	ONC2_126_LYPD3	No
110	17	Commonrare	1	63602	63754	RPH3AL	Trans-Flank	0.000723823	5.65018e-11	0.000187917	0.000318401	0.017179	0.000872421	0.000321104	5.65018e-11	210	322	8	15965386	16424999	MSR1	NEU_126_MSR1	No
54	11	Commonrare	1	57365601	57365834	SERPING1	Trans-Flank	0.00816924	5.0904e-11	0.00788634	0.0111136	0.00869858	0.0364046	0.00688487	5.0904e-11	99	84	17	62079953	62097994	ICAM2	CVD3_188_ICAM-2	Other chromosome
28	1	Rare only	1	227920052	227920417	JMJD4	Trans-Flank	0.122579	6.12978e-11	5.04869e-11	0.105293	0.00466319	0.0344028	0.0217207	5.04869e-11	98	157	17	6977855	6983626	CLEC10A	NEU_167_CLEC10A	Other chromosome
129	15	Commonrare	1	91418930	91419187	FURIN	Trans-Flank	0.161843	4.83083e-11	0.000313965	0.0957794	0.0204545	0.0515438	0.0247263	4.83083e-11	156	200	6	127439748	127518910	RSPO3	ONC2_187_RSPO3	No
36	16	Rare only	1	24268035	24268326	CACNG3	Trans-Flank	0.0547268	3.36121e-10	4.70408e-11	0.0318344	0.00313473	0.0298823	0.00907025	4.70408e-11	86	94	X	65815478	65859140	EDA2R	NEU_188_EDA2R	No
101	6	Rare only	1	80196680	80197623	LCA5	Trans-Flank	0.0308188	4.69293e-08	4.56528e-11	0.0313171	0.0969425	0.0502057	0.0270924	4.56528e-11	65	103	6	37598454	37667082	MDGA1	NEU_171_MDGA1	No
3	2	Commonrare	1	45879199	45879627	PRKCE	Trans-Flank	0.079597	4.53582e-11	0.0019255	0.0547365	0.0142998	0.01984	0.0195325	4.53582e-11	382	520	1	159141398	159173103	CADM3	NEU_105_CADM3	Other chromosome
19	3	Commonrare	1	42897779	42898003	CYP8B1	Trans-Flank	6.63973e-07	4.48781e-11	0.00111969	1.36412e-06	3.03775e-06	1.49091e-05	7.07812e-08	4.48781e-11	82	46	17	32597239	32599261	CCL7	INF_105_MCP-3	Other chromosome
169	20	Commonrare	1	37377081	37377536	ACTR5	Trans-Flank	0.00158789	4.37435e-11	3.90785e-06	0.00278483	0.0521589	0.0064877	0.00148163	4.37435e-11	110	176	12	65444405	65515346	WIF1	ONC2_192_WIF-1	Other chromosome
102	19	Commonrare	1	5455462	5456832	ZNRF4	Trans-Flank	0.00171648	3.91054e-11	0.0114434	0.00207447	0.595692	0.0216436	0.0204947	3.91054e-11	81	110	6	37598454	37667082	MDGA1	NEU_171_MDGA1	No
122	15	Commonrare	1	58247354	58247507	ALDH1A2	Trans-Flank	0.000672688	3.78779e-11	8.3e-06	0.0013636	0.000312625	0.000391463	0.000297496	3.78779e-11	188	219	3	157154577	157161417	PTX3	CVD2_163_PTX3	No
148	12	Rare only	1	55523512	55524600	OR9K2	Trans-Flank	0.905852	9.67503e-05	3.75669e-11	0.895617	0.00137808	0.583772	0.46085	3.75669e-11	50	37	4	186990305	187009223	TLR3	ONC2_164_TLR3	No
164	3	Commonrare	1	188123868	188124088	LPP	Trans-Flank	0.00551712	3.75549e-11	0.033521	0.00807129	0.753855	0.111119	0.155188	3.75549e-11	262	226	7	49813256	49961546	VWC2	NEU_108_VWC2	Yes - Rare	Primary,Trans,3,rs139719930,52859916,0.019,3.01e-24,7
13	22	Commonrare	1	30688323	30688880	TBC1D10A	Trans-CDS	0.414841	3.45894e-11	5.40205e-08	0.141879	0.00106226	0.0392149	0.00234002	3.45894e-11	4	5	17	34303528	34308532	CCL16	CVD3_196_CCL16	No
142	19	Commonrare	1	35842414	35843397	FFAR1	Trans-CDS	2.25752e-05	3.32403e-11	0.418934	1.01121e-05	0.16426	1.1859e-05	5.30994e-05	3.32403e-11	2	1	11	6411660	6416228	SMPD1	NEU_125_SMPD1	Other chromosome
20	13	Commonrare	1	37393454	37394134	RFXAP	Trans-Flank	0.0041337	3.21753e-11	0.00548732	0.0035038	0.0316198	0.00128019	0.00237011	3.21753e-11	46	64	3	112640055	112693969	CD200R1	NEU_194_CD200R1	Other chromosome
49	1	Commonrare	1	67558647	67559327	C1orf141	Trans-Flank	0.0693557	3.15888e-11	6.27192e-06	0.0460254	0.178323	0.0400472	0.0584167	3.15888e-11	68	93	17	62079953	62097994	ICAM2	CVD3_188_ICAM-2	Other chromosome
105	3	Commonrare	1	47604049	47604291	CSPG5	Trans-Flank	0.00678474	3.07029e-11	7.73624e-05	0.00435132	0.556246	0.00875233	0.00994896	3.07029e-11	79	33	8	15965386	16424999	MSR1	NEU_126_MSR1	No
39	13	Rare only	1	28009771	28010070	MTIF3	Trans-CDS	3.17652e-08	3.57781e-10	2.84113e-11	0.0817231	1.78877e-08	0.000219277	1.22192e-06	2.84113e-11	2	2	19	49977463	49989488	FLT3LG	INF_167_Flt3L	Yes - Rare	Primary,Trans,13,rs76428106,28604007,0.016,1.61e-17,19
60	1	Commonrare	1	111983811	111984051	WDR77	Trans-Flank	0.0551505	2.83323e-11	4.41224e-06	0.0190899	0.373875	0.12862	0.0426066	2.83323e-11	87	102	2	102681003	102796334	IL1R1	CVD3_155_IL-1RT1	No
97	15	Commonrare	1	33603206	33603337	RYR3	Trans-Flank	0.227869	2.71903e-11	3.87609e-06	0.306335	0.0108246	0.0300575	0.0930588	2.71903e-11	187	262	19	43964938	43969812	LYPD3	ONC2_126_LYPD3	No
95	11	Commonrare	1	43333637	43333786	API5	Trans-Flank	0.00287232	2.61821e-11	0.0180784	0.00187481	0.206138	0.0199352	0.00281004	2.61821e-11	71	56	19	43964938	43969812	LYPD3	ONC2_126_LYPD3	No
107	12	Commonrare	1	8975207	8975349	A2ML1	Trans-Flank	0.00546177	2.5204e-11	0.014631	0.0042822	0.353988	0.0821544	0.00829688	2.5204e-11	76	65	8	15965386	16424999	MSR1	NEU_126_MSR1	No
150	8	Commonrare	1	6668678	6669900	XKR5	Trans-Flank	0.00326461	2.36624e-11	0.000107005	0.00465329	0.0335944	0.06589	0.00595456	2.36624e-11	145	202	11	113558271	113577095	TMPRSS5	NEU_149_TMPRSS5	No
44	18	Commonrare	1	6942037	6942278	LAMA1	Trans-Flank	0.0208543	2.36466e-11	0.00140666	0.00875611	0.11214	0.0572129	0.0119476	2.36466e-11	80	95	7	23275585	23314727	GPNMB	ONC2_149_GPNMB	No
99	16	Commonrare	1	78133635	78133822	WWOX	Trans-Flank	0.0559239	2.11423e-11	0.000661921	0.0651225	0.751835	0.0852346	0.228144	2.11423e-11	728	709	19	43964938	43969812	LYPD3	ONC2_126_LYPD3	No
59	10	Commonrare	1	11894036	11894254	PROSER2	Trans-Flank	0.00801199	1.81927e-11	0.000140575	0.0102781	0.011832	0.0302774	0.00968879	1.81927e-11	97	150	11	112013973	112034840	IL18	CVD2_133_IL-18	No
162	2	Rare only	1	212248299	212248825	ERBB4	Trans-Flank	0.163409	3.0635e-11	1.75449e-11	0.156811	0.0172568	0.156874	0.111756	1.75449e-11	327	337	7	49813256	49961546	VWC2	NEU_108_VWC2	Other chromosome
127	9	Commonrare	1	32405464	32405641	ACO1	Trans-Flank	0.00395693	1.68962e-11	0.000766938	0.00447991	0.200173	0.00163939	0.00168728	1.68962e-11	85	109	6	127439748	127518910	RSPO3	ONC2_187_RSPO3	No
138	11	Commonrare	1	47295425	47295567	MADD	Trans-Flank	0.0350528	1.56222e-11	1.3395e-05	0.0316746	0.015212	0.0628825	0.020728	1.56222e-11	257	264	19	51628164	51639908	SIGLEC9	NEU_109_Siglec-9	Other chromosome
93	10	Commonrare	1	38299641	38299751	ZNF33A	Trans-Flank	0.0666267	1.27275e-11	2.45134e-06	0.0781676	0.00279281	0.199332	0.0156779	1.27275e-11	66	69	19	43964938	43969812	LYPD3	ONC2_126_LYPD3	No
84	2	Commonrare	1	129025695	129026484	HS6ST1	Trans-Flank	0.0335892	1.22546e-11	0.000125149	0.0402144	0.0407407	0.0128739	0.0181845	1.22546e-11	149	223	19	43964938	43969812	LYPD3	ONC2_126_LYPD3	No
135	1	Rare only	1	64669693	64669839	UBE2U	Trans-Flank	0.462743	1.60488e-07	1.05098e-11	0.459751	0.00129276	0.290026	0.078396	1.05098e-11	69	99	20	3667616	3687775	SIGLEC1	NEU_131_SIGLEC1	No
106	6	Commonrare	1	33036386	33036621	HLA-DPA1	Trans-CDS	0.000340333	8.92339e-12	3.22973e-07	0.000273233	0.000261985	0.00024724	0.000247308	8.92339e-12	5	33	8	15965386	16424999	MSR1	NEU_126_MSR1	No
146	19	Commonrare	1	31767412	31770698	TSHZ3	Trans-Flank	1.51267e-05	8.07355e-12	0.034707	1.54466e-05	0.240814	0.0324805	3.37795e-05	8.07355e-12	91	60	20	23026269	23030378	THBD	CVD2_154_TM	No
156	1	Commonrare	1	1477405	1477587	SSU72	Trans-Flank	0.0105985	7.86215e-12	3.19423e-05	0.00892317	0.0153268	0.00157467	0.0032473	7.86215e-12	216	187	1	175284329	175712906	TNR	NEU_193_TN-R	No
91	8	Commonrare	1	101270743	101271514	RNF19A	Trans-Flank	0.0035739	5.4845e-12	0.000109435	0.00335158	0.137234	0.000117934	0.00111838	5.4845e-12	95	91	19	43964938	43969812	LYPD3	ONC2_126_LYPD3	No
25	5	Commonrare	1	50679465	50679573	ISL1	Trans-Flank	0.000363942	4.90795e-12	4.08516e-07	0.000265711	0.0932295	0.00110887	0.000689702	4.90795e-12	79	44	17	72537246	72542282	CD300C	NEU_110_CLM-6	No
41	11	Commonrare	1	106558234	106558522	GUCY1A2	Trans-CDS	2.29356e-06	3.92646e-12	0.265968	3.39563e-05	1.80807e-05	2.23262e-05	1.74503e-06	3.92646e-12	3	5	11	71825914	71850936	FOLR3	ONC2_188_FR-gamma	No
139	5	Rare only	1	148725062	148725219	GRPEL2	Trans-Flank	0.0871695	1.03426e-10	2.68508e-12	0.0680645	0.00053679	0.0378919	0.00791633	2.68508e-12	156	151	11	6411660	6416228	SMPD1	NEU_125_SMPD1	Other chromosome
160	17	Commonrare	1	3567001	3567219	TAX1BP3	Trans-CDS	0.000337018	2.05852e-12	NA	3.1196e-05	0.0998059	3.37194e-05	3.20062e-05	2.05852e-12	0	4	1	175284329	175712906	TNR	NEU_193_TN-R	No
90	7	Commonrare	1	65705372	65705577	TPST1	Trans-Flank	0.0233376	2.01219e-12	1.27999e-06	0.0161904	0.0147167	0.00341708	0.00265773	2.01219e-12	69	112	19	43964938	43969812	LYPD3	ONC2_126_LYPD3	No
46	13	Rare only	1	49822133	49822295	CDADC1	Trans-Flank	0.417187	4.41766e-07	2.01057e-12	0.446397	0.000949359	0.268483	0.160576	2.01057e-12	54	48	17	42422453	42430470	GRN	CVD3_118_GRN	Other chromosome
71	3	Commonrare	1	102153918	102154038	ZPLD1	Trans-Flank	4.73733e-05	1.96981e-12	0.00308883	1.85764e-05	0.000431741	3.10064e-06	4.98996e-07	1.96981e-12	52	37	19	51580751	51587502	KLK14	ONC2_138_hK14	No
98	15	Commonrare	1	62881838	62882001	TLN2	Trans-Flank	0.221854	1.40496e-12	4.7514e-06	0.158819	0.0677094	0.314912	0.0841492	1.40496e-12	191	180	19	43964938	43969812	LYPD3	ONC2_126_LYPD3	No
68	1	Commonrare	1	118506381	118506601	SPAG17	Trans-Flank	4.57186e-05	1.37703e-12	0.00876228	2.46976e-05	1.06001e-10	8.89805e-10	7.15806e-12	1.37703e-12	128	58	1	154377668	154441926	IL6R	CVD3_142_IL-6RA	No
161	18	Rare only	1	48573249	48573433	RP11-729L2.2	Trans-Flank	0.360343	2.39529e-07	1.36258e-12	0.377038	0.170211	0.306816	0.116526	1.36258e-12	87	45	1	175284329	175712906	TNR	NEU_193_TN-R	No
82	1	Commonrare	1	33985077	33985317	CSMD2	Trans-Flank	0.162847	1.1372e-12	0.00143079	0.150406	0.0354867	0.0506112	0.077601	1.1372e-12	281	274	19	43964938	43969812	LYPD3	ONC2_126_LYPD3	No
158	12	Commonrare	1	103981214	103981375	STAB2	Trans-Flank	0.000100412	8.49071e-13	1.30165e-05	0.000108044	0.0147516	0.000733096	2.91788e-05	8.49071e-13	135	171	1	175284329	175712906	TNR	NEU_193_TN-R	No
33	22	Rare only	1	25115398	25115595	PIWIL3	Trans-CDS	3.9891e-05	6.01975e-08	7.83417e-13	0.280651	0.00101541	0.0398501	0.0293459	7.83417e-13	14	6	4	76942269	76944650	CXCL10	INF_169_CXCL10	No
166	6	Commonrare	1	106494655	106494740	ATG5	Trans-Flank	0.00340374	6.58659e-13	3.62191e-05	0.00237877	0.0179574	0.000408728	0.000670114	6.58659e-13	225	274	12	65444405	65515346	WIF1	ONC2_192_WIF-1	Other chromosome
65	7	Commonrare	1	8153512	8153714	ICA1	Trans-Flank	0.0105683	6.48908e-13	1.70535e-09	0.00806178	0.00580275	0.000337621	0.00120806	6.48908e-13	180	231	2	102803432	102856462	IL1RL2	CVD2_124_IL1RL2	No
116	12	Rare only	1	89984720	89985112	ATP2B1	Trans-Flank	0.539761	8.11327e-08	5.90778e-13	0.50542	0.022887	0.290771	0.0090589	5.90778e-13	106	99	9	87283465	87641985	NTRK2	NEU_156_NTRK2	No
130	18	Commonrare	1	12686630	12686791	PSMG2	Trans-Flank	0.000260809	4.44752e-13	0.00109394	0.00022759	0.0329432	1.29946e-05	6.04724e-05	4.44752e-13	94	108	6	127439748	127518910	RSPO3	ONC2_187_RSPO3	No
147	6	Commonrare	1	41533458	41533742	FOXP4	Trans-Flank	0.0258957	3.01416e-13	8.0424e-08	0.0248486	0.0147485	0.0231803	0.0082995	3.01416e-13	198	252	4	186990305	187009223	TLR3	ONC2_164_TLR3	No
8	7	Commonrare	1	3341178	3341556	SDK1	Trans-Flank	0.000761339	2.65037e-13	0.00945703	0.000635397	0.116498	0.000796875	0.00136341	2.65037e-13	358	288	17	34303528	34308532	CCL16	CVD3_196_CCL16	No
111	17	Commonrare	1	31318916	31319030	SPACA3	Trans-Flank	0.0246771	2.61675e-13	1.47403e-06	0.0170645	0.00415617	0.00299015	0.0034427	2.61675e-13	86	124	8	15965386	16424999	MSR1	NEU_126_MSR1	No
96	11	Commonrare	1	133778923	133779212	IGSF9B	Trans-Flank	0.000238533	1.07095e-13	0.0430671	0.000256701	0.62524	0.0213597	0.000873007	1.07095e-13	194	173	19	43964938	43969812	LYPD3	ONC2_126_LYPD3	No
61	2	Commonrare	1	65540594	65541343	SPRED2	Trans-Flank	3.92612e-05	1.17236e-14	0.00151174	7.03874e-05	0.285613	0.000608565	0.000108154	1.17236e-14	166	171	2	102681003	102796334	IL1R1	CVD3_155_IL-1RT1	No
165	12	Commonrare	1	131438970	131439116	ADGRD1	Trans-Flank	0.0386884	9.56787e-15	2.79933e-11	0.0398415	0.00383046	0.0336267	0.0191924	9.56787e-15	199	280	7	49813256	49961546	VWC2	NEU_108_VWC2	Other chromosome
78	6	Commonrare	1	31691120	31691261	MPIG6B	Trans-Flank	0.016968	1.05232e-17	1.56426e-16	0.00902082	2.84294e-10	0.0101464	1.33225e-06	1.05232e-17	198	179	4	3508102	3534286	LRPAP1	NEU_127_Alpha-2-MRAP	Yes - Rare	Primary,Trans,6,rs113617295,30719481,0.010,2.23e-12,4
86	3	Commonrare	1	193854129	193854317	HES1	Trans-Flank	0.00040061	9.77466e-18	4.49799e-05	0.000420866	0.0122061	0.000167158	0.000329406	9.77466e-18	101	152	19	43964938	43969812	LYPD3	ONC2_126_LYPD3	No
117	12	Commonrare	1	103981214	103981375	STAB2	Trans-CDS	0.000153446	4.93532e-21	2.44469e-18	4.04081e-06	6.72934e-12	2.12316e-10	3.76875e-14	4.93532e-21	29	32	4	55095263	55164414	PDGFRA	NEU_173_PDGF-R-alpha	Yes - Rare	Primary,Trans,12,rs200223643,104098352,0.013,1.05e-19,4
163	3	Rare only	1	52847396	52847546	ITIH4	Trans-CDS	0.0225924	7.07828e-31	2.71818e-34	0.128164	8.63255e-27	3.96569e-05	8.21634e-05	2.71818e-34	8	13	7	49813256	49961546	VWC2	NEU_108_VWC2	Yes - Rare	Primary,Trans,3,rs139719930,52859916,0.019,3.01e-24,7
11	16	Commonrare	2	14841882	14842082	NPIPA2	Trans-Flank	0.0025453	4.45113e-10	0.50097	0.0089797	0.281722	0.000616799	0.025885	4.45113e-10	7	3	17	34303528	34308532	CCL16	CVD3_196_CCL16	No
80	17	Commonrare	2	7788084	7788441	CHD3	Trans-CDS	0.050325	4.44411e-10	2.32002e-07	0.0564998	0.000151796	0.00880725	0.001478	4.44411e-10	13	7	1	160765863	160798051	LY9	ONC2_116_LY9	No
93	10	Commonrare	2	38385505	38385600	ZNF37A	Trans-Flank	0.064016	3.73843e-10	7.47432e-05	0.0732218	0.00437547	0.17197	0.0284989	3.73843e-10	51	64	19	43964938	43969812	LYPD3	ONC2_126_LYPD3	No
95	11	Commonrare	2	43380464	43380703	TTC17	Trans-Flank	0.00431802	3.42774e-10	0.322356	0.00298413	0.327179	0.0768529	0.0265698	3.42774e-10	140	81	19	43964938	43969812	LYPD3	ONC2_126_LYPD3	No
121	7	Commonrare	2	150417095	150417534	GIMAP1-GIMAP5	Trans-Flank	0.0160703	3.19764e-10	0.00115329	0.0150412	0.369907	0.189552	0.0325146	3.19764e-10	90	125	15	55903743	56035288	PRTG	NEU_117_PRTG	No
88	7	Commonrare	2	6204534	6204687	CYTH3	Trans-CDS	0.0432888	3.16947e-10	1.13131e-05	0.0825223	0.00951907	0.0288769	0.0168226	3.16947e-10	4	2	19	43964938	43969812	LYPD3	ONC2_126_LYPD3	No
26	14	Eigen/CADD-weighted	2	103592754	103592941	TNFAIP2	Trans-Flank	2.98663e-10	2.03094e-09	0.0200219	1.17199e-07	0.200283	2.00394e-06	1.494e-08	2.98663e-10	240	273	1	160510884	160549306	CD84	CVD2_144_CD84	Yes	Primary,Trans,14,rs7150997,103571874,0.226,3.99e-14,1
58	7	Rare only	2	100136929	100137230	AGFG2	Trans-Flank	0.46482	2.57384e-06	2.97564e-10	0.497222	0.00485081	0.282948	0.123726	2.97564e-10	187	99	22	17565843	17596584	IL17RA	CVD3_105_IL-17RA	Other chromosome
51	5	Commonrare	2	125867037	125867118	ALDH7A1	Trans-Flank	0.0448595	2.87026e-10	1.92619e-06	0.0437472	0.00917145	0.0508848	0.00840125	2.87026e-10	119	113	17	62079953	62097994	ICAM2	CVD3_188_ICAM-2	Other chromosome
102	19	Commonrare	2	3178750	3179985	S1PR4	Trans-CDS	0.462683	2.79578e-10	0.16968	0.062858	0.0192659	0.0311186	0.030031	2.79578e-10	8	3	6	37598454	37667082	MDGA1	NEU_171_MDGA1	No
61	2	Commonrare	2	65455003	65455131	ACTR2	Trans-Flank	0.00427446	2.62521e-10	0.000593411	0.00442431	0.273259	0.00436646	0.00359165	2.62521e-10	114	91	2	102681003	102796334	IL1R1	CVD3_155_IL-1RT1	No
34	22	Rare only	2	50631449	50631562	TRABD	Trans-Flank	0.849875	2.9515e-08	2.29584e-10	0.872208	0.0122011	0.499401	0.325321	2.29584e-10	387	388	4	76942269	76944650	CXCL10	INF_169_CXCL10	No
63	12	Commonrare	2	132379506	132379697	ULK1	Trans-Flank	0.0509703	2.21283e-10	0.000555657	0.0676318	0.0279654	0.0533637	0.0352577	2.21283e-10	249	183	2	102681003	102796334	IL1R1	CVD3_155_IL-1RT1	No
86	3	Commonrare	2	188123868	188124088	LPP	Trans-Flank	0.0901765	2.09776e-10	0.00141273	0.0819249	0.351991	0.522084	0.0901916	2.09776e-10	263	226	19	43964938	43969812	LYPD3	ONC2_126_LYPD3	No
43	7	Rare only	2	45928211	45928640	IGFBP1	Trans-Flank	0.704753	1.20696e-08	1.91952e-10	0.584418	0.000677272	0.0719615	0.129513	1.91952e-10	51	63	7	23275585	23314727	GPNMB	ONC2_149_GPNMB	No
60	1	Commonrare	2	112018610	112018727	C1orf162	Trans-Flank	0.0582106	1.84749e-10	4.55845e-05	0.0204857	0.391214	0.150385	0.0451074	1.84749e-10	89	97	2	102681003	102796334	IL1R1	CVD3_155_IL-1RT1	No
87	4	Commonrare	2	110481453	110481632	MCUB	Trans-Flank	0.395478	1.81625e-10	8.62936e-05	0.353149	0.295959	0.217529	0.465318	1.81625e-10	110	103	19	43964938	43969812	LYPD3	ONC2_126_LYPD3	No
2	1	Commonrare	2	220863704	220864093	C1orf115	Trans-Flank	0.0563543	1.66091e-10	5.00231e-08	0.0390165	7.26336e-05	0.00186176	0.000182001	1.66091e-10	95	59	1	159141398	159173103	CADM3	NEU_105_CADM3	Other chromosome
81	22	Commonrare	2	19121668	19122028	DGCR14	Trans-Flank	0.0477524	1.51424e-10	0.000783647	0.0235575	0.439039	0.0940662	0.0299942	1.51424e-10	218	233	1	160765863	160798051	LY9	ONC2_116_LY9	No
48	6	Eigen/CADD-weighted	2	31513144	31513356	ATP6V1G2	Trans-CDS	1.51356e-10	1.17614e-09	0.772231	3.41532e-08	0.611613	3.24549e-08	2.33784e-05	1.51356e-10	1	1	5	54398475	54406080	GZMA	NEU_157_GZMA	Yes	Primary,Trans,6,6:31101250,31101250,0.128,5.26e-09,5
41	11	Commonrare	2	101918161	101918351	C11orf70	Trans-CDS	7.85937e-06	1.50632e-10	0.480624	7.36342e-06	0.0190424	7.17724e-06	0.000959126	1.50632e-10	4	1	11	71825914	71850936	FOLR3	ONC2_188_FR-gamma	No
76	12	Commonrare	2	52695660	52696109	KRT86	Trans-Flank	0.0170424	1.44709e-10	2.94411e-05	0.013958	0.113177	0.0476002	0.00981822	1.44709e-10	202	387	1	236681299	236716281	LGALS8	NEU_140_gal-8	No
20	13	Commonrare	2	37422772	37422996	SMAD9	Trans-Flank	0.00484538	1.34727e-10	0.0235697	0.00397305	0.0400962	0.00123331	0.00377125	1.34727e-10	56	68	3	112640055	112693969	CD200R1	NEU_194_CD200R1	Other chromosome
149	3	Commonrare	2	138213816	138213958	CEP70	Trans-CDS	0.000977591	1.33465e-10	0.000646302	0.000511042	0.257322	0.00456566	0.0010024	1.33465e-10	7	7	11	113558271	113577095	TMPRSS5	NEU_149_TMPRSS5	No
109	16	Commonrare	2	18804533	18804732	ARL6IP1	Trans-Flank	0.00192649	1.23751e-10	0.00160916	0.00223331	0.000366135	0.000453023	0.000100411	1.23751e-10	38	33	8	15965386	16424999	MSR1	NEU_126_MSR1	No
5	19	Commonrare	2	43674206	43674330	PSG5	Trans-Flank	0.00117438	1.20569e-10	0.000233186	0.000906728	0.0304477	0.00324578	0.00078557	1.20569e-10	31	56	1	159141398	159173103	CADM3	NEU_105_CADM3	Other chromosome
26	14	Commonrare	2	103552309	103552458	RP11-736N17.11	Trans-Flank	3.11964e-10	1.00835e-10	0.0577934	1.28114e-09	0.0737363	5.07436e-08	1.90714e-10	1.00835e-10	236	195	1	160510884	160549306	CD84	CVD2_144_CD84	Yes	Primary,Trans,14,rs7150997,103571874,0.226,3.99e-14,1
33	22	Rare only	2	31059383	31059484	DUSP18	Trans-Flank	0.15163	3.11639e-08	8.07066e-11	0.145073	0.0169949	0.165943	0.0215061	8.07066e-11	145	110	4	76942269	76944650	CXCL10	INF_169_CXCL10	No
161	18	Rare only	2	48573376	48573705	SMAD4	Trans-Flank	0.336266	6.9601e-07	7.42439e-11	0.373794	0.223725	0.512036	0.217333	7.42439e-11	108	58	1	175284329	175712906	TNR	NEU_193_TN-R	No
129	15	Commonrare	2	91428235	91428442	FES	Trans-Flank	0.182427	7.28188e-11	0.000371856	0.117754	0.0312326	0.0724059	0.0394178	7.28188e-11	163	203	6	127439748	127518910	RSPO3	ONC2_187_RSPO3	No
107	12	Commonrare	2	9070233	9070427	PHC1	Trans-Flank	0.00490351	6.81489e-11	0.0418607	0.0045463	0.305036	0.0552836	0.00427543	6.81489e-11	73	72	8	15965386	16424999	MSR1	NEU_126_MSR1	No
147	6	Commonrare	2	41606447	41606603	MDFI	Trans-Flank	0.0424987	6.28328e-11	8.62758e-06	0.031474	0.0269919	0.0210641	0.0128127	6.28328e-11	194	248	4	186990305	187009223	TLR3	ONC2_164_TLR3	No
19	3	Commonrare	2	42905954	42906408	ACKR2	Trans-Flank	6.2791e-07	6.08729e-11	0.00140305	1.60157e-06	3.93987e-06	2.26062e-05	1.30588e-07	6.08729e-11	75	43	17	32597239	32599261	CCL7	INF_105_MCP-3	Other chromosome
17	19	Commonrare	2	49244124	49244325	IZUMO1	Trans-Flank	1.7335e-06	5.58426e-11	0.000307757	8.09325e-06	0.0609366	0.000260683	1.27597e-05	5.58426e-11	141	155	19	8117650	8127534	CCL25	INF_185_CCL25	Yes	Primary,Trans,19,rs679574,49206108,0.285,1.27e-08,19
169	20	Commonrare	2	37353327	37353797	SLC32A1	Trans-Flank	0.000786442	5.144e-11	2.56895e-05	0.00136974	0.0436793	0.00152269	0.000633342	5.144e-11	90	149	12	65444405	65515346	WIF1	ONC2_192_WIF-1	Other chromosome
158	12	Commonrare	2	103981214	103981375	STAB2	Trans-CDS	0.00684139	4.84785e-11	3.9687e-06	0.00649554	0.00148526	0.00231803	6.76294e-05	4.84785e-11	29	32	1	175284329	175712906	TNR	NEU_193_TN-R	No
115	5	Commonrare	2	176759046	176759287	LMAN2	Trans-Flank	1.5325e-08	4.43444e-11	0.000635552	1.71354e-08	0.00277063	9.003e-05	5.36146e-08	4.43444e-11	179	99	2	206546713	206662857	NRP2	NEU_102_NRP2	Yes	Primary,Trans,5,rs2545801,176841339,0.328,1.28e-14,2
138	11	Commonrare	2	47353381	47353472	MYBPC3	Trans-Flank	0.0320542	3.51987e-11	5.28034e-05	0.0297797	0.0119682	0.0624268	0.0197987	3.51987e-11	256	257	19	51628164	51639908	SIGLEC9	NEU_109_Siglec-9	Other chromosome
82	1	Commonrare	2	34643350	34643750	C1orf94	Trans-Flank	0.112008	3.46687e-11	0.102236	0.0935482	0.112501	0.0176535	0.0610781	3.46687e-11	85	91	19	43964938	43969812	LYPD3	ONC2_126_LYPD3	No
86	3	Commonrare	2	197518109	197518451	LRCH3	Trans-Flank	0.0589482	2.48701e-11	2.82286e-05	0.0901142	0.0409952	0.0517431	0.0387293	2.48701e-11	115	100	19	43964938	43969812	LYPD3	ONC2_126_LYPD3	No
111	17	Commonrare	2	31258506	31258717	TMEM98	Trans-Flank	0.0489173	1.9877e-11	1.1376e-05	0.0290007	0.0185409	0.00520925	0.00658972	1.9877e-11	109	123	8	15965386	16424999	MSR1	NEU_126_MSR1	No
156	1	Commonrare	2	1470698	1470927	TMEM240	Trans-Flank	0.0160723	1.24328e-11	9.59241e-06	0.0120076	0.0154349	0.00242781	0.00458886	1.24328e-11	230	194	1	175284329	175712906	TNR	NEU_193_TN-R	No
106	6	Commonrare	2	32936982	32937169	BRD2	Trans-Flank	6.86802e-05	1.01066e-11	0.0119765	4.93522e-05	0.162059	0.000204722	0.000129539	1.01066e-11	239	518	8	15965386	16424999	MSR1	NEU_126_MSR1	No
68	1	Commonrare	2	118506381	118506601	SPAG17	Trans-CDS	0.000207311	7.58194e-12	0.110557	8.44593e-05	2.07099e-09	2.80928e-09	2.13759e-11	7.58194e-12	16	10	1	154377668	154441926	IL6R	CVD3_142_IL-6RA	No
130	18	Commonrare	2	12673323	12673542	CEP76	Trans-Flank	0.000300952	6.33144e-12	0.00233875	0.000324466	0.033327	5.79938e-06	9.1439e-05	6.33144e-12	90	99	6	127439748	127518910	RSPO3	ONC2_187_RSPO3	No
90	7	Commonrare	2	66236829	66237105	RABGEF1	Trans-Flank	0.0040794	2.89456e-12	0.000882814	0.00291564	0.0291754	0.000953993	0.00110807	2.89456e-12	64	119	19	43964938	43969812	LYPD3	ONC2_126_LYPD3	No
139	5	Rare only	2	148737591	148737759	PCYOX1L	Trans-Flank	0.062498	1.29643e-10	2.88581e-12	0.0488553	0.00146336	0.0513473	0.00913723	2.88581e-12	167	181	11	6411660	6416228	SMPD1	NEU_125_SMPD1	Other chromosome
14	3	Commonrare	2	16926494	16926579	PLCL2	Trans-CDS	2.36254e-10	1.58596e-12	6.80754e-05	3.14293e-06	1.79866e-05	6.03473e-12	8.08604e-12	1.58596e-12	6	6	16	57438678	57449974	CCL17	CVD2_165_CCL17	Yes	Primary,Trans,3,rs2228467,42906116,0.070,5.92e-11,16	Conditional 1,Trans,3,rs115792481,16940157,0.091,1.86e-10,16
165	12	Commonrare	2	131514180	131514413	AC078925.1	Trans-Flank	0.0170694	3.53769e-13	4.78009e-10	0.0309763	0.00361294	0.0454003	0.0207539	3.53769e-13	98	157	7	49813256	49961546	VWC2	NEU_108_VWC2	Other chromosome
29	9	MAF weight - B(1,5)	2	136080675	136080836	OBP2B	Trans-Flank	4.77716e-07	3.50644e-13	0.0670632	6.77089e-10	0.000430391	1.6086e-13	3.49567e-12	1.6086e-13	206	329	1	15764934	15775737	CTRC	CVD2_138_CTRC	Yes	Primary,Trans,9,rs77693339,136128558,0.094,1.57e-15,1
16	6	MAF weight - B(1,5)	2	32605195	32605348	HLA-DQA1	Trans-Flank	3.26669e-10	2.40673e-11	0.0472436	3.09386e-10	0.00666038	1.60484e-13	2.17595e-11	1.60484e-13	186	1711	9	34689563	34691274	CCL19	INF_145_CCL19	Yes	Primary,Trans,6,6:32668773,32668773,0.158,5.22e-20,9
96	11	Commonrare	2	123753804	123754099	TMEM225	Trans-Flank	0.00368998	1.21668e-13	2.31759e-08	0.00638686	0.00237363	0.0173304	0.00319009	1.21668e-13	39	80	19	43964938	43969812	LYPD3	ONC2_126_LYPD3	No
37	13	Commonrare	2	102375140	102375357	FGF14	Trans-Flank	0.0042813	1.10898e-13	1.70673e-13	0.0045303	1.467e-07	0.000161664	0.000208838	1.10898e-13	198	177	2	47572296	47614740	EPCAM	CVD3_152_Ep-CAM	Yes	Primary,Trans,13,rs56398830,103701690,0.052,2.27e-18,2
119	9	MAF weight - B(1,5)	2	136325148	136325349	CACFD1	Trans-CDS	0.00138353	6.56971e-13	0.0979577	3.59656e-06	0.00310342	4.05315e-14	1.55648e-08	4.05315e-14	5	3	7	131185020	131242976	PODXL	ONC2_127_PODXL	Yes	Primary,Trans,9,9:136141870,136141870,0.155,1.67e-28,7
140	12	Commonrare	2	102271527	102271738	DRAM1	Trans-Flank	4.35483e-06	1.72293e-14	0.00386547	5.72945e-06	0.0220013	0.000170838	6.95784e-06	1.72293e-14	161	185	11	6411660	6416228	SMPD1	NEU_125_SMPD1	Yes	Primary,Trans,12,rs4764809,102096012,0.482,3.81e-10,11
117	12	Commonrare	2	103981214	103981375	STAB2	Trans-Flank	1.70958e-09	1.00626e-14	1.64237e-06	7.06404e-10	2.94394e-06	8.88729e-09	4.11477e-12	1.00626e-14	135	171	4	55095263	55164414	PDGFRA	NEU_173_PDGF-R-alpha	Yes - Rare	Primary,Trans,12,rs200223643,104098352,0.013,1.05e-19,4
120	19	Commonrare	2	49259453	49259768	FGF21	Trans-Flank	7.44683e-11	7.76288e-15	0.0230044	5.62927e-10	0.223334	1.41396e-06	7.44424e-11	7.76288e-15	139	154	16	2762418	2770552	PRSS27	CVD2_121_PRSS27	Yes	Primary,Trans,19,rs679574,49206108,0.282,1.44e-14,16
143	6	Commonrare	2	31371369	31371519	MICA	Trans-Flank	8.18074e-13	3.26561e-15	0.106292	2.83316e-13	0.326037	3.50819e-14	5.73503e-14	3.26561e-15	212	588	9	27109138	27230173	TEK	CVD2_122_TIE2	Yes	Primary,Trans,6,rs34277309,31329245,0.284,1.19e-17,9
144	9	Commonrare	2	136080675	136080836	OBP2B	Trans-Flank	7.25758e-07	3.90779e-16	0.00249307	1.07885e-09	3.09455e-05	1.39984e-15	1.04078e-12	3.90779e-16	206	329	9	27109138	27230173	TEK	CVD2_122_TIE2	Yes	Primary,Trans,9,rs77693339,136128558,0.094,4.56e-20,9
35	10	Commonrare	2	65281265	65281377	REEP3	Trans-Flank	7.31121e-12	3.2056e-16	0.0726175	5.52377e-12	0.169864	1.42965e-06	1.61259e-12	3.2056e-16	138	140	4	74861358	74864496	CXCL5	INF_154_CXCL5	Yes	Primary,Trans,10,rs7088799,65016174,0.444,2.82e-14,4
30	12	Unweighted	2	102122664	102122798	SYCP3	Trans-Flank	2.98809e-16	5.86759e-17	0.000603375	3.16469e-17	0.00553549	4.00776e-16	3.6408e-17	3.16469e-17	74	99	20	57570239	57582302	CTSZ	CVD3_185_CTSZ	Yes	Primary,Trans,12,rs975431,102185145,0.217,7.48e-22,20
113	2	Commonrare	2	242629985	242630108	ING5	Trans-Flank	8.20407e-12	1.25884e-17	2.67307e-07	1.43482e-11	0.000198362	8.54949e-11	1.30889e-12	1.25884e-17	220	373	19	8959519	9092018	MUC16	ONC2_191_MUC-16	Yes	Primary,Trans,2,rs62193069,242730565,0.140,4.10e-17,19
78	6	Commonrare	2	31686832	31687122	LY6G6C	Trans-Flank	0.0183428	1.06179e-17	2.8818e-16	0.0101457	5.2407e-11	0.00725494	1.03626e-06	1.06179e-17	202	190	4	3508102	3534286	LRPAP1	NEU_127_Alpha-2-MRAP	Yes - Rare	Primary,Trans,6,rs113617295,30719481,0.010,2.23e-12,4
163	3	Rare only	2	52811591	52811788	ITIH1	Trans-CDS	0.0654966	8.7682e-12	4.65377e-18	0.121846	4.01149e-11	0.00316615	0.00101197	4.65377e-18	9	11	7	49813256	49961546	VWC2	NEU_108_VWC2	Yes - Rare	Primary,Trans,3,rs139719930,52859916,0.019,3.01e-24,7
52	9	MAF weight - B(1,5)	2	136130948	136131097	ABO	Trans-Flank	1.88282e-16	1.29733e-16	0.0368154	5.80141e-16	0.000688542	1.45262e-18	4.53401e-18	1.45262e-18	225	331	17	62079953	62097994	ICAM2	CVD3_188_ICAM-2	Yes	Primary,Trans,9,9:136138765,136138765,0.151,3.83e-44,17
40	3	Commonrare	2	98518175	98518725	DCBLD2	Trans-CDS	5.1958e-13	3.52475e-19	0.00297804	2.62062e-13	1.31003e-05	2.58891e-06	1.38607e-11	3.52475e-19	6	7	5	180028505	180076624	FLT4	ONC2_190_VEGFR-3	Yes	Primary,Trans,3,rs10935473,98416900,0.472,2.26e-38,5
118	9	MAF weight - B(1,5)	2	136080675	136080836	OBP2B	Trans-Flank	3.63225e-12	9.71681e-19	0.156686	4.09738e-15	3.70981e-05	2.18375e-20	2.72947e-18	2.18375e-20	208	329	17	62399864	62491136	PECAM1	CVD3_194_PECAM-1	Yes	Primary,Trans,9,9:136151579,136151579,0.151,7.87e-28,17	Conditional 1,Trans,9,rs77693339,136128558,0.096,6.80e-13,17
132	9	Commonrare	2	136130948	136131097	ABO	Trans-Flank	3.96747e-19	8.93466e-25	0.00199287	4.03053e-19	0.000147567	3.15159e-21	1.05026e-21	8.93466e-25	225	331	1	169691781	169733846	SELE	CVD3_136_SELE	Yes	Primary,Trans,9,9:136141870,136141870,0.151,7.35e-68,1
137	3	Commonrare	2	98250837	98252000	GPR15	Trans-Flank	4.57703e-13	2.08372e-25	3.88837e-05	2.42184e-12	2.77514e-10	1.30502e-15	3.42684e-16	2.08372e-25	116	130	19	51628164	51639908	SIGLEC9	NEU_109_Siglec-9	Yes	Primary,Trans,3,rs10935473,98416900,0.472,1.14e-53,19
153	19	Commonrare	2	44111728	44112299	ZNF428	Trans-Flank	9.97614e-18	1.5314e-26	3.49851e-07	4.55338e-16	2.86341e-15	1.93162e-25	2.29124e-25	1.5314e-26	136	111	8	22941867	22974950	TNFRSF10C	CVD3_134_TNFRSF10C	Yes	Primary,Trans,19,rs4760,44153100,0.139,6.49e-90,8
57	5	Commonrare	2	158695883	158696117	UBLCP1	Trans-Flank	2.23752e-16	1.9168e-32	0.00806734	3.10361e-19	2.32703e-07	7.96277e-27	9.03496e-27	1.9168e-32	83	71	3	159706536	159713806	IL12A	NEU_186_IL-12B	Yes	Primary,Trans,5,rs6556416,158818745,0.264,1.64e-33,3
45	1	Commonrare	2	109822702	109822818	PSRC1	Trans-CDS	6.3213e-24	1.745e-34	0.302859	1.50621e-22	0.734366	3.71842e-24	2.22591e-15	1.745e-34	8	1	17	42422453	42430470	GRN	CVD3_118_GRN	Yes	Primary,Trans,1,rs12740374,109817590,0.216,3.26e-42,17
50	3	Commonrare	2	98216979	98217067	CLDND1	Trans-Flank	3.87771e-19	6.05283e-35	1.51912e-05	4.47793e-17	2.01786e-14	6.58433e-21	4.74445e-22	6.05283e-35	119	135	17	62079953	62097994	ICAM2	CVD3_188_ICAM-2	Yes	Primary,Trans,3,rs11927405,98402969,0.471,1.64e-51,17
6	1	Eigen/CADD-weighted	2	159272114	159272249	FCER1A	Trans-Flank	2.0892e-41	3.51204e-29	9.43851e-05	1.30307e-39	8.17268e-08	1.87633e-16	2.06017e-29	2.0892e-41	55	61	17	32683470	32685629	CCL13	INF_136_MCP-4	Yes	Primary,Trans,1,rs12075,159175354,0.472,1.41e-54,17
18	3	Commonrare	2	46449121	46449225	CCRL2	Trans-CDS	9.77944e-06	3.8925e-44	0.0166537	5.3828e-30	0.0891409	3.71765e-36	1.54223e-36	3.8925e-44	5	5	17	34430982	34433014	CCL4	INF_130_CCL4	Yes	Primary,Trans,3,rs113341849,46384204,0.234,3.16e-44,17
27	9	Commonrare	2	136028923	136029688	GBGT1	Trans-Flank	2.79486e-21	3.41222e-47	0.0130199	2.05371e-29	3.03705e-11	3.8298e-46	2.97862e-39	3.41222e-47	256	320	16	66400524	66438689	CDH5	CVD3_127_CDH5	Yes	Primary,Trans,9,rs77693339,136128558,0.096,2.9e-56,16
103	3	Commonrare	2	52870599	52870691	TMEM110	Trans-Flank	2.72947e-41	5.60198e-58	0.000551679	3.52591e-42	1.40689e-05	2.09806e-15	4.83209e-47	5.60198e-58	116	114	3	154741912	154901518	MME	NEU_143_NEP	Yes	Primary,Trans,3,rs35004449,52852897,0.369,2.54e-55,3
26	14	Eigen/CADD-weighted	3	103566516	103566990	EXOC3L4	Trans-Flank	4.25612e-10	1.34683e-09	0.0589152	1.93638e-09	0.141192	6.66124e-07	1.51713e-09	4.25612e-10	237	229	1	160510884	160549306	CD84	CVD2_144_CD84	Yes	Primary,Trans,14,rs7150997,103571874,0.226,3.99e-14,1
158	12	Commonrare	3	103667617	103667701	C12orf42	Trans-Flank	0.00257531	4.02471e-10	3.01175e-06	0.00532899	0.000130356	0.0402454	0.000817302	4.02471e-10	152	108	1	175284329	175712906	TNR	NEU_193_TN-R	No
34	22	Rare only	3	50528477	50528654	MOV10L1	Trans-Flank	0.675844	6.50708e-08	3.61741e-10	0.657405	0.0217539	0.199638	0.194119	3.61741e-10	445	507	4	76942269	76944650	CXCL10	INF_169_CXCL10	No
58	7	Rare only	3	100082894	100083042	NYAP1	Trans-Flank	0.513698	2.34659e-05	3.42379e-10	0.49756	0.00769987	0.295602	0.196584	3.42379e-10	173	96	22	17565843	17596584	IL17RA	CVD3_105_IL-17RA	Other chromosome
87	4	Commonrare	3	110661828	110662001	CFI	Trans-Flank	0.368918	3.33906e-10	0.000330698	0.388311	0.0978056	0.161558	0.316603	3.33906e-10	87	104	19	43964938	43969812	LYPD3	ONC2_126_LYPD3	No
60	1	Commonrare	3	112042531	112043218	ADORA3	Trans-Flank	0.0653391	2.66977e-10	0.000104401	0.0257556	0.442807	0.145336	0.0429933	2.66977e-10	104	111	2	102681003	102796334	IL1R1	CVD3_155_IL-1RT1	No
107	12	Commonrare	3	9093278	9093505	M6PR	Trans-Flank	0.0059965	2.63972e-10	0.0259772	0.00587432	0.28036	0.0890607	0.00520407	2.63972e-10	65	61	8	15965386	16424999	MSR1	NEU_126_MSR1	No
109	16	Commonrare	3	18800262	18800480	RP11-1035H13.3	Trans-Flank	0.0016058	2.63897e-10	0.00160916	0.00186006	0.000375708	0.0004943	0.000113829	2.63897e-10	38	35	8	15965386	16424999	MSR1	NEU_126_MSR1	No
2	1	Rare only	3	223116125	223116714	DISP1	Trans-Flank	0.0585004	2.55096e-07	2.54339e-10	0.0303726	0.000952305	0.0227645	0.00608996	2.54339e-10	86	118	1	159141398	159173103	CADM3	NEU_105_CADM3	Other chromosome
111	17	Commonrare	3	31340942	31341124	ASIC2	Trans-Flank	0.0906369	1.93772e-10	0.000785676	0.0709958	0.171114	0.0423802	0.0660741	1.93772e-10	368	489	8	15965386	16424999	MSR1	NEU_126_MSR1	No
17	19	Commonrare	3	49216483	49216847	MAMSTR	Trans-Flank	7.37409e-06	1.68381e-10	0.000291587	1.60833e-05	0.0256077	0.000124732	1.01178e-05	1.68381e-10	171	172	19	8117650	8127534	CCL25	INF_185_CCL25	Yes	Primary,Trans,19,rs679574,49206108,0.285,1.27e-08,19
81	22	Commonrare	3	19167691	19167791	CLTCL1	Trans-Flank	0.0608156	1.65629e-10	7.55241e-05	0.0305932	0.333068	0.110469	0.0378509	1.65629e-10	226	246	1	160765863	160798051	LY9	ONC2_116_LY9	No
37	13	Commonrare	3	103698442	103698650	SLC10A2	Trans-Flank	3.63609e-05	1.4237e-10	0.001366	0.000314167	2.54631e-05	3.1767e-09	4.61188e-07	1.4237e-10	81	61	2	47572296	47614740	EPCAM	CVD3_152_Ep-CAM	Yes	Primary,Trans,13,rs56398830,103701690,0.052,2.27e-18,2
5	19	Commonrare	3	43716570	43716667	PSG9	Trans-CDS	0.00426673	1.3813e-10	4.13973e-06	3.86588e-05	0.0113176	0.0037413	0.00027646	1.3813e-10	5	4	1	159141398	159173103	CADM3	NEU_105_CADM3	Other chromosome
138	11	Commonrare	3	47270314	47270455	NR1H3	Trans-Flank	0.0411041	9.17202e-11	4.74966e-06	0.04535	0.0130015	0.0557756	0.02769	9.17202e-11	203	210	19	51628164	51639908	SIGLEC9	NEU_109_Siglec-9	Other chromosome
33	22	Commonrare	3	25202252	25202351	SGSM1	Trans-CDS	0.0098899	8.50434e-11	8.72183e-11	0.0212634	0.00104567	0.00198717	0.000863868	8.50434e-11	13	14	4	76942269	76944650	CXCL10	INF_169_CXCL10	No
129	15	Commonrare	3	91447397	91447609	MAN2A2	Trans-Flank	0.184776	7.84936e-11	0.000365517	0.130604	0.0253239	0.0847208	0.0427956	7.84936e-11	160	201	6	127439748	127518910	RSPO3	ONC2_187_RSPO3	No
165	12	Commonrare	3	122958003	122958862	ZCCHC8	Trans-CDS	0.02844	7.60061e-11	1.67317e-08	0.0558058	0.00348725	0.0183289	0.0117276	7.60061e-11	5	5	7	49813256	49961546	VWC2	NEU_108_VWC2	Other chromosome
130	18	Commonrare	3	12785781	12785883	PTPN2	Trans-Flank	0.000286775	7.43006e-11	0.00111132	0.00027611	0.0117025	0.000533388	7.59275e-05	7.43006e-11	106	124	6	127439748	127518910	RSPO3	ONC2_187_RSPO3	No
115	5	Commonrare	3	176784985	176785110	RGS14	Trans-Flank	4.69183e-07	4.51406e-11	0.000145307	2.91801e-06	0.00124115	5.6689e-05	1.89535e-07	4.51406e-11	206	110	2	206546713	206662857	NRP2	NEU_102_NRP2	Yes	Primary,Trans,5,rs2545801,176841339,0.328,1.28e-14,2
139	5	Rare only	3	148753891	148754203	IL17B	Trans-Flank	0.0462524	2.9871e-10	2.43169e-11	0.0367889	0.00120416	0.0508495	0.0069977	2.43169e-11	159	176	11	6411660	6416228	SMPD1	NEU_125_SMPD1	Other chromosome
156	1	Commonrare	3	1534674	1535435	FNDC10	Trans-Flank	0.0150044	1.67757e-11	1.93987e-05	0.0138755	0.0125784	0.00126007	0.00404389	1.67757e-11	198	154	1	175284329	175712906	TNR	NEU_193_TN-R	No
119	9	Commonrare	3	136208314	136208584	MED22	Trans-Flank	2.47634e-08	1.55507e-11	0.0625506	3.24022e-09	0.00429344	3.32071e-09	9.19327e-08	1.55507e-11	213	348	7	131185020	131242976	PODXL	ONC2_127_PODXL	Yes	Primary,Trans,9,9:136141870,136141870,0.155,1.67e-28,7
117	12	Commonrare	3	102796244	102796384	IGF1	Trans-Flank	1.02398e-05	2.89554e-12	5.82832e-06	5.35689e-06	0.000182151	6.64924e-05	2.39475e-06	2.89554e-12	93	91	4	55095263	55164414	PDGFRA	NEU_173_PDGF-R-alpha	Yes - Rare	Primary,Trans,12,rs200223643,104098352,0.013,1.05e-19,4
90	7	Commonrare	3	66236829	66237105	RABGEF1	Trans-Flank	0.0040794	2.89456e-12	0.000882814	0.00291564	0.0291754	0.000953993	0.00110807	2.89456e-12	64	119	19	43964938	43969812	LYPD3	ONC2_126_LYPD3	No
29	9	MAF weight - B(1,5)	3	136130948	136131097	ABO	Trans-CDS	3.67073e-08	8.95211e-12	0.922967	3.55623e-06	0.001214	4.37786e-13	6.91542e-10	4.37786e-13	10	25	1	15764934	15775737	CTRC	CVD2_138_CTRC	Yes	Primary,Trans,9,rs77693339,136128558,0.094,1.57e-15,1
96	11	Commonrare	3	123810283	123811320	OR4D5	Trans-Flank	0.00519286	3.8298e-13	3.36586e-07	0.00435719	0.0150428	0.0199051	0.00312157	3.8298e-13	38	73	19	43964938	43969812	LYPD3	ONC2_126_LYPD3	No
143	6	Commonrare	3	31237227	31237342	HLA-B	Trans-Flank	5.44347e-10	2.14102e-13	0.0088339	3.60389e-10	0.0245667	4.75525e-12	2.23715e-11	2.14102e-13	308	924	9	27109138	27230173	TEK	CVD2_122_TIE2	Yes	Primary,Trans,6,rs34277309,31329245,0.284,1.19e-17,9
16	6	MAF weight - B(1,5)	3	32627972	32628066	HLA-DQB1	Trans-Flank	3.1829e-10	2.16765e-11	0.0455887	2.9446e-10	0.00616182	1.66776e-13	2.09764e-11	1.66776e-13	199	1716	9	34689563	34691274	CCL19	INF_145_CCL19	Yes	Primary,Trans,6,6:32668773,32668773,0.158,5.22e-20,9
37	13	MAF weight - B(1,25)	3	103468798	103468944	BIVM-ERCC5	Trans-CDS	0.000780381	1.31772e-12	0.958212	0.00907545	1.66036e-13	2.31355e-13	8.23107e-09	1.66036e-13	14	7	2	47572296	47614740	EPCAM	CVD3_152_Ep-CAM	Yes	Primary,Trans,13,rs56398830,103701690,0.052,2.27e-18,2
140	12	Commonrare	3	102091599	102091952	CHPT1	Trans-Flank	3.10105e-08	4.41081e-14	3.96071e-05	1.79542e-07	0.106177	6.08357e-07	5.34564e-07	4.41081e-14	81	110	11	6411660	6416228	SMPD1	NEU_125_SMPD1	Yes	Primary,Trans,12,rs4764809,102096012,0.482,3.81e-10,11
163	3	Rare only	3	49308572	49308918	C3orf62	Trans-Flank	0.0105643	7.96599e-12	2.84344e-14	0.00923795	8.51281e-08	0.000404654	0.000792568	2.84344e-14	71	51	7	49813256	49961546	VWC2	NEU_108_VWC2	Yes - Rare	Primary,Trans,3,rs139719930,52859916,0.019,3.01e-24,7
120	19	Commonrare	3	49216483	49216847	MAMSTR	Trans-CDS	3.03882e-12	2.47129e-14	0.00216305	1.40522e-11	0.00247391	9.16339e-08	1.82667e-13	2.47129e-14	3	6	16	2762418	2770552	PRSS27	CVD2_121_PRSS27	Yes	Primary,Trans,19,rs679574,49206108,0.282,1.44e-14,16
144	9	Commonrare	3	136130948	136131097	ABO	Trans-Flank	1.3737e-07	1.35146e-15	0.00568647	4.33505e-08	0.00369383	1.10742e-14	7.85598e-12	1.35146e-15	222	331	9	27109138	27230173	TEK	CVD2_122_TIE2	Yes	Primary,Trans,9,rs77693339,136128558,0.094,4.56e-20,9
113	2	Commonrare	3	242674599	242674971	D2HGDH	Trans-Flank	1.91491e-11	1.17849e-15	2.74315e-07	2.14112e-11	0.000622835	9.80872e-07	6.60831e-11	1.17849e-15	244	434	19	8959519	9092018	MUC16	ONC2_191_MUC-16	Yes	Primary,Trans,2,rs62193069,242730565,0.140,4.10e-17,19
52	9	MAF weight - B(0.5,0.5)	3	136080675	136080836	OBP2B	Trans-Flank	1.45684e-10	5.70237e-14	0.0649672	5.98342e-14	1.63485e-05	1.22329e-15	6.36522e-16	6.36522e-16	208	329	17	62079953	62097994	ICAM2	CVD3_188_ICAM-2	Yes	Primary,Trans,9,9:136138765,136138765,0.151,3.83e-44,17
35	10	Commonrare	3	64893135	64893300	NRBF2	Trans-CDS	1.96447e-11	3.77018e-16	NA	1.96447e-11	1.96447e-11	1.96447e-11	1.96447e-11	3.77018e-16	0	1	4	74861358	74864496	CXCL5	INF_154_CXCL5	Yes	Primary,Trans,10,rs7088799,65016174,0.444,2.82e-14,4
30	12	Unweighted	3	102091599	102091952	CHPT1	Trans-Flank	4.08184e-16	6.43917e-17	0.00105253	3.61031e-17	0.00517855	4.43574e-17	4.25721e-17	3.61031e-17	82	109	20	57570239	57582302	CTSZ	CVD3_185_CTSZ	Yes	Primary,Trans,12,rs975431,102185145,0.217,7.48e-22,20
78	6	Commonrare	3	31654948	31655112	ABHD16A	Trans-Flank	0.0138358	1.12027e-17	2.92513e-16	0.0103927	2.34176e-11	0.00713747	1.00627e-06	1.12027e-17	206	203	4	3508102	3534286	LRPAP1	NEU_127_Alpha-2-MRAP	Yes - Rare	Primary,Trans,6,rs113617295,30719481,0.010,2.23e-12,4
118	9	Commonrare	3	136028923	136029688	GBGT1	Trans-Flank	2.19985e-10	1.11329e-18	0.0665091	1.94909e-13	7.74938e-06	2.4311e-17	1.85737e-16	1.11329e-18	256	320	17	62399864	62491136	PECAM1	CVD3_194_PECAM-1	Yes	Primary,Trans,9,9:136151579,136151579,0.151,7.87e-28,17	Conditional 1,Trans,9,rs77693339,136128558,0.096,6.80e-13,17
40	3	Commonrare	3	98250837	98252000	GPR15	Trans-Flank	2.24395e-09	3.68479e-19	0.00243196	1.04482e-08	6.48405e-08	1.46229e-12	2.64668e-11	3.68479e-19	115	131	5	180028505	180076624	FLT4	ONC2_190_VEGFR-3	Yes	Primary,Trans,3,rs10935473,98416900,0.472,2.26e-38,5
132	9	Commonrare	3	136080675	136080836	OBP2B	Trans-Flank	3.36356e-13	6.92706e-22	0.0152127	6.47557e-18	1.91155e-06	3.50296e-16	2.43227e-19	6.92706e-22	208	329	1	169691781	169733846	SELE	CVD3_136_SELE	Yes	Primary,Trans,9,9:136141870,136141870,0.151,7.35e-68,1
57	5	Commonrare	3	158585637	158586083	RNF145	Trans-Flank	2.30061e-13	1.21507e-23	0.000583732	4.20721e-14	0.00024582	2.12422e-19	2.99712e-18	1.21507e-23	141	106	3	159706536	159713806	IL12A	NEU_186_IL-12B	Yes	Primary,Trans,5,rs6556416,158818745,0.264,1.64e-33,3
137	3	Commonrare	3	98281197	98281326	CPOX	Trans-Flank	1.54123e-17	2.14644e-25	0.00717774	1.81119e-18	2.84762e-06	1.24031e-18	1.09418e-22	2.14644e-25	139	143	19	51628164	51639908	SIGLEC9	NEU_109_Siglec-9	Yes	Primary,Trans,3,rs10935473,98416900,0.472,1.14e-53,19
153	19	Commonrare	3	44116233	44118461	SRRM5	Trans-Flank	9.97158e-18	1.67215e-26	3.83103e-07	4.54715e-16	3.02561e-15	1.93587e-25	2.20443e-25	1.67215e-26	135	111	8	22941867	22974950	TNFRSF10C	CVD3_134_TNFRSF10C	Yes	Primary,Trans,19,rs4760,44153100,0.139,6.49e-90,8
50	3	Commonrare	3	98281197	98281326	CPOX	Trans-Flank	4.96838e-24	4.8335e-33	0.0111119	5.62918e-24	1.46745e-07	1.76215e-24	1.43842e-29	4.8335e-33	140	144	17	62079953	62097994	ICAM2	CVD3_188_ICAM-2	Yes	Primary,Trans,3,rs11927405,98402969,0.471,1.64e-51,17
45	1	Commonrare	3	109756574	109756790	SARS	Trans-Flank	1.97164e-26	2.37285e-34	3.17031e-05	2.7657e-26	2.79077e-06	2.69883e-20	6.1751e-30	2.37285e-34	179	158	17	42422453	42430470	GRN	CVD3_118_GRN	Yes	Primary,Trans,1,rs12740374,109817590,0.216,3.26e-42,17
6	1	Commonrare	3	159174709	159174810	ACKR1	Trans-Flank	7.26293e-34	1.41356e-35	7.34088e-06	2.62316e-32	1.11083e-10	6.56563e-17	7.42098e-28	1.41356e-35	97	74	17	32683470	32685629	CCL13	INF_136_MCP-4	Yes	Primary,Trans,1,rs12075,159175354,0.472,1.41e-54,17
18	3	Commonrare	3	46477645	46477760	LTF	Trans-Flank	1.60616e-40	4.01754e-44	0.0308013	3.00259e-40	0.00196093	7.19856e-14	1.77555e-28	4.01754e-44	104	168	17	34430982	34433014	CCL4	INF_130_CCL4	Yes	Primary,Trans,3,rs113341849,46384204,0.234,3.16e-44,17
27	9	MAF weight - B(1,5)	3	136130948	136131097	ABO	Trans-CDS	5.59459e-28	4.23749e-41	0.373126	3.04292e-19	7.94024e-08	1.17732e-45	5.82019e-34	1.17732e-45	10	25	16	66400524	66438689	CDH5	CVD3_127_CDH5	Yes	Primary,Trans,9,rs77693339,136128558,0.096,2.9e-56,16
103	3	Commonrare	3	52847396	52847546	ITIH4	Trans-Flank	1.46094e-40	1.00816e-57	0.000394966	9.33409e-42	4.72997e-05	1.85756e-15	2.63245e-46	1.00816e-57	108	107	3	154741912	154901518	MME	NEU_143_NEP	Yes	Primary,Trans,3,rs35004449,52852897,0.369,2.54e-55,3
60	1	Commonrare	4	111992123	111992243	ATP5F1	Trans-Flank	0.0638646	3.77057e-10	5.65528e-05	0.0222907	0.443254	0.158662	0.0544533	3.77057e-10	88	102	2	102681003	102796334	IL1R1	CVD3_155_IL-1RT1	No
2	1	Commonrare	4	220702124	220702255	MARK1	Trans-Flank	0.0472173	2.8286e-10	6.47504e-08	0.0361934	0.000282352	0.000594326	0.000241742	2.8286e-10	145	72	1	159141398	159173103	CADM3	NEU_105_CADM3	Other chromosome
30	12	Commonrare	4	102406845	102407010	WASHC3	Trans-Flank	3.3772e-06	2.8168e-10	0.00950134	2.45216e-06	0.00170721	4.5717e-05	2.12138e-06	2.8168e-10	114	127	20	57570239	57582302	CTSZ	CVD3_185_CTSZ	Yes	Primary,Trans,12,rs975431,102185145,0.217,7.48e-22,20
130	18	Commonrare	4	12449596	12449935	SPIRE1	Trans-Flank	0.00100721	2.27648e-10	0.0122237	0.00126596	0.0602558	6.80086e-05	0.000401438	2.27648e-10	167	164	6	127439748	127518910	RSPO3	ONC2_187_RSPO3	No
81	22	Commonrare	4	19118872	19120029	TSSK2	Trans-Flank	0.0475977	2.11578e-10	0.00125269	0.0235305	0.485018	0.0932415	0.0337123	2.11578e-10	215	231	1	160765863	160798051	LY9	ONC2_116_LY9	No
33	22	Rare only	4	25115398	25115595	PIWIL3	Trans-Flank	0.198	2.06129e-07	2.00726e-10	0.245414	0.00563568	0.0175722	0.064492	2.00726e-10	61	61	4	76942269	76944650	CXCL10	INF_169_CXCL10	No
5	19	Commonrare	4	43697483	43697580	PSG4	Trans-Flank	0.00107177	1.44365e-10	0.000124343	0.00085476	0.0463997	0.0040733	0.000594774	1.44365e-10	34	56	1	159141398	159173103	CADM3	NEU_105_CADM3	Other chromosome
117	12	Rare only	4	101674020	101674145	UTP20	Trans-CDS	0.355792	2.41286e-09	1.43486e-10	0.343729	9.77145e-06	0.0938832	0.043822	1.43486e-10	29	25	4	55095263	55164414	PDGFRA	NEU_173_PDGF-R-alpha	Yes - Rare	Primary,Trans,12,rs200223643,104098352,0.013,1.05e-19,4
138	11	Commonrare	4	47376737	47377137	SPI1	Trans-Flank	0.03414	1.3244e-10	0.000125168	0.0312809	0.0300398	0.0845137	0.024656	1.3244e-10	241	231	19	51628164	51639908	SIGLEC9	NEU_109_Siglec-9	Other chromosome
6	1	Commonrare	4	154990979	154991276	DCST2	Trans-CDS	0.00108007	5.67402e-11	0.00117108	0.0485135	2.05312e-05	0.000212605	0.00214105	5.67402e-11	7	3	17	32683470	32685629	CCL13	INF_136_MCP-4	Yes	Primary,Trans,1,rs12075,159175354,0.472,1.41e-54,17
115	5	Commonrare	4	176827123	176827617	PFN3	Trans-Flank	3.12439e-06	5.16227e-11	4.93117e-05	9.49187e-06	0.000503484	2.2262e-05	2.04562e-07	5.16227e-11	247	138	2	206546713	206662857	NRP2	NEU_102_NRP2	Yes	Primary,Trans,5,rs2545801,176841339,0.328,1.28e-14,2
156	1	Commonrare	4	1550799	1551053	MIB2	Trans-Flank	0.0337348	2.48748e-11	1.38044e-05	0.0178462	0.0138594	0.00157631	0.00477207	2.48748e-11	193	154	1	175284329	175712906	TNR	NEU_193_TN-R	No
119	9	Commonrare	4	136080675	136080836	OBP2B	Trans-Flank	2.19674e-06	1.59092e-11	0.131907	2.18081e-09	0.000405888	2.02686e-07	8.19562e-08	1.59092e-11	204	329	7	131185020	131242976	PODXL	ONC2_127_PODXL	Yes	Primary,Trans,9,9:136141870,136141870,0.155,1.67e-28,7
117	12	Rare only	4	104171566	104171899	NT5DC3	Trans-Flank	0.00706714	3.50794e-11	1.21993e-11	0.00551818	4.43025e-07	0.000226137	0.000232562	1.21993e-11	104	197	4	55095263	55164414	PDGFRA	NEU_173_PDGF-R-alpha	Yes - Rare	Primary,Trans,12,rs200223643,104098352,0.013,1.05e-19,4
90	7	Commonrare	4	66220999	66221104	RABGEF1	Trans-Flank	0.00521816	6.01107e-12	0.00157256	0.00486659	0.015637	0.000988194	0.00125586	6.01107e-12	63	129	19	43964938	43969812	LYPD3	ONC2_126_LYPD3	No
143	6	Commonrare	4	31236905	31236990	HLA-C	Trans-Flank	5.9379e-09	2.40549e-12	0.00733819	3.34022e-09	0.0182795	1.12804e-10	3.48473e-08	2.40549e-12	220	788	9	27109138	27230173	TEK	CVD2_122_TIE2	Yes	Primary,Trans,6,rs34277309,31329245,0.284,1.19e-17,9
96	11	Commonrare	4	123813533	123814585	OR6T1	Trans-Flank	0.00464794	6.01135e-13	4.31475e-07	0.00386216	0.0190438	0.0197753	0.00384775	6.01135e-13	37	70	19	43964938	43969812	LYPD3	ONC2_126_LYPD3	No
29	9	Commonrare	4	136130948	136131097	ABO	Trans-Flank	9.48304e-08	5.22875e-13	0.075795	4.35198e-08	0.0173424	6.48461e-12	5.19004e-11	5.22875e-13	222	331	1	15764934	15775737	CTRC	CVD2_138_CTRC	Yes	Primary,Trans,9,rs77693339,136128558,0.094,1.57e-15,1
163	3	Commonrare	4	53902705	53902929	ACTR8	Trans-CDS	0.142931	4.58055e-13	3.46277e-12	0.0512973	5.58703e-08	1.26068e-06	3.45711e-07	4.58055e-13	6	8	7	49813256	49961546	VWC2	NEU_108_VWC2	Yes - Rare	Primary,Trans,3,rs139719930,52859916,0.019,3.01e-24,7
16	6	MAF weight - B(1,5)	4	32546827	32546921	HLA-DRB1	Trans-Flank	1.69116e-07	1.61622e-10	0.0241486	1.83376e-07	0.00358414	3.85615e-13	5.14637e-11	3.85615e-13	139	1620	9	34689563	34691274	CCL19	INF_145_CCL19	Yes	Primary,Trans,6,6:32668773,32668773,0.158,5.22e-20,9
113	2	Commonrare	4	242615501	242615692	DTYMK	Trans-Flank	1.26438e-09	5.54755e-14	2.40473e-06	6.06756e-09	0.000211877	3.13322e-06	6.98712e-08	5.54755e-14	164	278	19	8959519	9092018	MUC16	ONC2_191_MUC-16	Yes	Primary,Trans,2,rs62193069,242730565,0.140,4.10e-17,19
140	12	Commonrare	4	101988808	101988913	MYBPC1	Trans-Flank	1.00441e-07	4.58323e-14	4.19972e-05	2.16063e-07	0.0798672	8.15016e-06	2.04543e-06	4.58323e-14	105	118	11	6411660	6416228	SMPD1	NEU_125_SMPD1	Yes	Primary,Trans,12,rs4764809,102096012,0.482,3.81e-10,11
120	19	Commonrare	4	49253400	49254578	FUT1	Trans-Flank	8.41608e-11	2.68416e-14	0.0214852	7.42813e-10	0.303885	2.58771e-06	1.52037e-10	2.68416e-14	136	150	16	2762418	2770552	PRSS27	CVD2_121_PRSS27	Yes	Primary,Trans,19,rs679574,49206108,0.282,1.44e-14,16
35	10	Commonrare	4	64893135	64893300	NRBF2	Trans-Flank	3.5245e-10	1.46949e-14	0.0783914	3.9348e-11	0.23334	2.193e-06	1.53794e-10	1.46949e-14	95	85	4	74861358	74864496	CXCL5	INF_154_CXCL5	Yes	Primary,Trans,10,rs7088799,65016174,0.444,2.82e-14,4
144	9	Commonrare	4	136028923	136029688	GBGT1	Trans-Flank	1.43019e-05	9.03994e-15	0.014417	1.72136e-07	0.000178746	1.78988e-14	1.06751e-10	9.03994e-15	254	320	9	27109138	27230173	TEK	CVD2_122_TIE2	Yes	Primary,Trans,9,rs77693339,136128558,0.094,4.56e-20,9
52	9	Unweighted	4	136230299	136230391	SURF4	Trans-Flank	2.41474e-15	3.31664e-10	0.0392867	9.1882e-16	0.0628036	5.71663e-13	2.72024e-12	9.1882e-16	231	334	17	62079953	62097994	ICAM2	CVD3_188_ICAM-2	Yes	Primary,Trans,9,9:136138765,136138765,0.151,3.83e-44,17
118	9	Commonrare	4	135973933	135974189	RALGDS	Trans-Flank	2.05662e-08	3.26786e-16	0.00955835	5.67339e-11	0.00011869	3.81463e-13	3.41283e-13	3.26786e-16	274	291	17	62399864	62491136	PECAM1	CVD3_194_PECAM-1	Yes	Primary,Trans,9,9:136151579,136151579,0.151,7.87e-28,17	Conditional 1,Trans,9,rs77693339,136128558,0.096,6.80e-13,17
30	12	Commonrare	4	101988808	101988913	MYBPC1	Trans-Flank	2.80189e-15	7.84372e-17	0.000870431	1.21796e-15	0.00436065	1.59887e-14	1.7821e-15	7.84372e-17	106	117	20	57570239	57582302	CTSZ	CVD3_185_CTSZ	Yes	Primary,Trans,12,rs975431,102185145,0.217,7.48e-22,20
78	6	Rare only	4	31926929	31927031	SKIV2L	Trans-Flank	0.120789	4.21575e-14	1.20493e-17	0.107745	8.03205e-06	0.0386595	2.00909e-05	1.20493e-17	111	107	4	3508102	3534286	LRPAP1	NEU_127_Alpha-2-MRAP	Yes - Rare	Primary,Trans,6,rs113617295,30719481,0.010,2.23e-12,4
57	5	Commonrare	4	159343872	159344901	ADRA1B	Trans-Flank	4.25653e-10	1.45232e-18	5.81821e-05	3.24432e-10	0.00753259	2.13475e-10	1.466e-10	1.45232e-18	133	92	3	159706536	159713806	IL12A	NEU_186_IL-12B	Yes	Primary,Trans,5,rs6556416,158818745,0.264,1.64e-33,3
40	3	Commonrare	4	98281197	98281326	CPOX	Trans-Flank	4.48171e-12	4.00594e-19	0.0207491	1.98732e-12	9.52326e-06	2.20372e-14	2.75987e-15	4.00594e-19	137	144	5	180028505	180076624	FLT4	ONC2_190_VEGFR-3	Yes	Primary,Trans,3,rs10935473,98416900,0.472,2.26e-38,5
132	9	Unweighted	4	136230299	136230391	SURF4	Trans-Flank	8.54584e-19	4.04689e-16	0.000238083	2.12113e-20	0.0176899	1.95025e-19	2.03945e-17	2.12113e-20	231	334	1	169691781	169733846	SELE	CVD3_136_SELE	Yes	Primary,Trans,9,9:136141870,136141870,0.151,7.35e-68,1
137	3	Commonrare	4	98216979	98217067	CLDND1	Trans-Flank	9.96692e-13	2.00417e-24	5.13605e-05	9.69841e-12	9.26975e-11	5.74149e-15	2.11434e-15	2.00417e-24	118	134	19	51628164	51639908	SIGLEC9	NEU_109_Siglec-9	Yes	Primary,Trans,3,rs10935473,98416900,0.472,1.14e-53,19
153	19	Commonrare	4	44127441	44127631	CADM4	Trans-Flank	1.3298e-17	2.19261e-25	1.4616e-06	8.21524e-16	2.02529e-15	7.1725e-24	2.9897e-25	2.19261e-25	145	120	8	22941867	22974950	TNFRSF10C	CVD3_134_TNFRSF10C	Yes	Primary,Trans,19,rs4760,44153100,0.139,6.49e-90,8
50	3	Commonrare	4	98451667	98451895	ST3GAL6	Trans-Flank	1.95888e-21	1.42491e-31	0.0572402	1.25342e-23	1.11666e-05	1.98787e-16	6.53439e-29	1.42491e-31	89	91	17	62079953	62097994	ICAM2	CVD3_188_ICAM-2	Yes	Primary,Trans,3,rs11927405,98402969,0.471,1.64e-51,17
6	1	Eigen/CADD-weighted	4	159141515	159141683	CADM3	Trans-Flank	5.68067e-34	1.39703e-33	2.22555e-06	2.2314e-32	9.21327e-11	1.88014e-14	1.44574e-25	5.68067e-34	109	86	17	32683470	32685629	CCL13	INF_136_MCP-4	Yes	Primary,Trans,1,rs12075,159175354,0.472,1.41e-54,17
45	1	Commonrare	4	109822702	109822818	PSRC1	Trans-Flank	6.63028e-27	5.63833e-34	5.36087e-05	7.37845e-29	9.04403e-06	6.51598e-20	1.2415e-29	5.63833e-34	163	131	17	42422453	42430470	GRN	CVD3_118_GRN	Yes	Primary,Trans,1,rs12740374,109817590,0.216,3.26e-42,17
18	3	Commonrare	4	46449121	46449225	CCRL2	Trans-Flank	7.33845e-43	8.703e-44	0.0215594	7.42439e-42	0.0131558	1.39791e-15	3.36878e-30	8.703e-44	98	147	17	34430982	34433014	CCL4	INF_130_CCL4	Yes	Primary,Trans,3,rs113341849,46384204,0.234,3.16e-44,17
27	9	MAF weight - B(1,5)	4	136130948	136131097	ABO	Trans-Flank	5.34576e-28	1.34008e-44	0.0372086	2.28585e-30	6.88545e-06	2.90981e-45	1.68941e-38	2.90981e-45	225	331	16	66400524	66438689	CDH5	CVD3_127_CDH5	Yes	Primary,Trans,9,rs77693339,136128558,0.096,2.9e-56,16
103	3	Commonrare	4	52867122	52867303	RP5-966M1.6	Trans-Flank	4.86778e-41	1.37913e-57	0.000601328	4.67052e-42	3.88719e-05	1.70584e-15	2.09477e-46	1.37913e-57	101	106	3	154741912	154901518	MME	NEU_143_NEP	Yes	Primary,Trans,3,rs35004449,52852897,0.369,2.54e-55,3
60	1	Commonrare	5	111957045	111958006	OVGP1	Trans-Flank	0.0564099	4.46726e-10	3.67785e-05	0.0185039	0.545534	0.0969432	0.0417623	4.46726e-10	87	119	2	102681003	102796334	IL1R1	CVD3_155_IL-1RT1	No
33	22	Rare only	5	31032397	31033096	SLC35E4	Trans-Flank	0.149602	1.11968e-07	4.41895e-10	0.139841	0.0219545	0.13173	0.0222031	4.41895e-10	170	131	4	76942269	76944650	CXCL10	INF_169_CXCL10	No
81	22	Commonrare	5	19026337	19026674	DGCR2	Trans-Flank	0.0527411	3.64652e-10	0.000466132	0.0286378	0.180624	0.0657962	0.0313077	3.64652e-10	267	307	1	160765863	160798051	LY9	ONC2_116_LY9	No
143	6	Commonrare	5	31939733	31940033	STK19	Trans-Flank	3.40947e-05	3.3217e-10	0.00266684	2.48418e-05	0.000212541	4.30226e-05	5.68225e-06	3.3217e-10	111	98	9	27109138	27230173	TEK	CVD2_122_TIE2	Yes	Primary,Trans,6,rs34277309,31329245,0.284,1.19e-17,9
6	1	Commonrare	5	156785581	156785670	NTRK1	Trans-CDS	0.00129099	1.37524e-10	0.000108908	0.00132789	3.16442e-05	0.000514425	2.6419e-06	1.37524e-10	14	7	17	32683470	32685629	CCL13	INF_136_MCP-4	Yes	Primary,Trans,1,rs12075,159175354,0.472,1.41e-54,17
29	9	Commonrare	5	135973933	135974189	RALGDS	Trans-Flank	1.37105e-05	9.8297e-11	0.037165	3.48224e-08	0.00348734	9.91481e-10	1.88144e-09	9.8297e-11	271	291	1	15764934	15775737	CTRC	CVD2_138_CTRC	Yes	Primary,Trans,9,rs77693339,136128558,0.094,1.57e-15,1
6	1	Commonrare	5	159141515	159141683	CADM3	Trans-CDS	0.000132321	9.81168e-11	0.00649159	1.69446e-08	9.71424e-05	3.07714e-10	1.36292e-07	9.81168e-11	7	2	17	32683470	32685629	CCL13	INF_136_MCP-4	Yes	Primary,Trans,1,rs12075,159175354,0.472,1.41e-54,17
143	6	Commonrare	5	32724189	32724283	HLA-DQB2	Trans-Flank	6.02697e-05	8.37466e-11	0.000307178	5.39199e-05	0.000999433	0.00129026	3.5336e-05	8.37466e-11	171	839	9	27109138	27230173	TEK	CVD2_122_TIE2	Yes	Primary,Trans,6,rs34277309,31329245,0.284,1.19e-17,9
156	1	Commonrare	5	1447608	1447893	ATAD3A	Trans-Flank	0.032115	8.15117e-11	9.13588e-07	0.022702	0.0163782	0.00924855	0.0101171	8.15117e-11	275	241	1	175284329	175712906	TNR	NEU_193_TN-R	No
115	5	Commonrare	5	176812702	176812891	SLC34A1	Trans-Flank	3.02271e-06	5.51731e-11	5.2448e-05	9.36981e-06	0.000532155	2.33008e-05	2.09038e-07	5.51731e-11	252	140	2	206546713	206662857	NRP2	NEU_102_NRP2	Yes	Primary,Trans,5,rs2545801,176841339,0.328,1.28e-14,2
144	9	Commonrare	5	132652777	132652865	FNBP1	Trans-CDS	0.00390909	2.91091e-11	0.00907813	0.000173777	0.00683902	8.58979e-06	0.000213437	2.91091e-11	8	3	9	27109138	27230173	TEK	CVD2_122_TIE2	Yes	Primary,Trans,9,rs77693339,136128558,0.094,4.56e-20,9
119	9	Commonrare	5	136215058	136215141	RPL7A	Trans-Flank	7.68151e-08	2.25391e-11	0.0662346	5.97477e-08	0.0041792	3.33294e-09	8.76007e-08	2.25391e-11	202	338	7	131185020	131242976	PODXL	ONC2_127_PODXL	Yes	Primary,Trans,9,9:136141870,136141870,0.155,1.67e-28,7
16	6	MAF weight - B(1,5)	5	32724189	32724283	HLA-DQB2	Trans-Flank	1.52577e-07	4.33771e-10	0.452287	2.0141e-07	0.00303428	1.92497e-11	8.50202e-11	1.92497e-11	171	839	9	34689563	34691274	CCL19	INF_145_CCL19	Yes	Primary,Trans,6,6:32668773,32668773,0.158,5.22e-20,9
35	10	Eigen/CADD-weighted	5	64927764	64927934	JMJD1C	Trans-CDS	1.00793e-11	1.71582e-11	0.236235	3.17419e-10	0.249872	1.31922e-05	2.53484e-08	1.00793e-11	20	12	4	74861358	74864496	CXCL5	INF_154_CXCL5	Yes	Primary,Trans,10,rs7088799,65016174,0.444,2.82e-14,4
90	7	Commonrare	5	66220999	66221104	RABGEF1	Trans-Flank	0.00521816	6.01107e-12	0.00157256	0.00486659	0.015637	0.000988194	0.00125586	6.01107e-12	63	129	19	43964938	43969812	LYPD3	ONC2_126_LYPD3	No
96	11	Commonrare	5	123777098	123778123	OR8D4	Trans-Flank	0.00512988	7.14792e-13	2.87759e-07	0.00752403	0.00513492	0.0254792	0.00471502	7.14792e-13	41	82	19	43964938	43969812	LYPD3	ONC2_126_LYPD3	No
163	3	Rare only	5	52446855	52446976	PHF7	Trans-Flank	0.463663	2.03651e-05	5.18347e-13	0.476794	0.078992	0.331436	0.132543	5.18347e-13	239	180	7	49813256	49961546	VWC2	NEU_108_VWC2	Yes - Rare	Primary,Trans,3,rs139719930,52859916,0.019,3.01e-24,7
113	2	Commonrare	5	242577089	242577179	ATG4B	Trans-Flank	1.10769e-07	2.5707e-13	1.04643e-06	2.79662e-08	1.24129e-05	1.73721e-05	5.20246e-08	2.5707e-13	200	357	19	8959519	9092018	MUC16	ONC2_191_MUC-16	Yes	Primary,Trans,2,rs62193069,242730565,0.140,4.10e-17,19
140	12	Commonrare	5	102122664	102122798	SYCP3	Trans-Flank	4.07285e-08	1.71304e-13	3.35986e-05	3.40681e-08	0.0888571	2.84659e-06	6.85145e-07	1.71304e-13	73	100	11	6411660	6416228	SMPD1	NEU_125_SMPD1	Yes	Primary,Trans,12,rs4764809,102096012,0.482,3.81e-10,11
120	19	Commonrare	5	49244124	49244325	IZUMO1	Trans-Flank	8.24166e-11	3.3196e-14	0.0267088	7.09645e-10	0.335127	2.17888e-06	1.45152e-10	3.3196e-14	139	155	16	2762418	2770552	PRSS27	CVD2_121_PRSS27	Yes	Primary,Trans,19,rs679574,49206108,0.282,1.44e-14,16
52	9	Eigen/CADD-weighted	5	136223428	136223586	SURF2	Trans-Flank	6.86379e-15	1.48831e-10	0.0518822	7.5911e-15	0.0464273	3.56611e-12	6.68301e-12	6.86379e-15	206	339	17	62079953	62097994	ICAM2	CVD3_188_ICAM-2	Yes	Primary,Trans,9,9:136138765,136138765,0.151,3.83e-44,17
30	12	Commonrare	5	102271527	102271738	DRAM1	Trans-Flank	7.88623e-09	3.13266e-15	0.0038515	2.23478e-08	0.0114746	9.36734e-08	1.23635e-08	3.13266e-15	160	187	20	57570239	57582302	CTSZ	CVD3_185_CTSZ	Yes	Primary,Trans,12,rs975431,102185145,0.217,7.48e-22,20
57	5	Commonrare	5	159437495	159437905	TTC1	Trans-Flank	1.97499e-09	1.59243e-15	0.000654761	1.85387e-08	0.030319	5.20999e-08	9.33988e-08	1.59243e-15	130	98	3	159706536	159713806	IL12A	NEU_186_IL-12B	Yes	Primary,Trans,5,rs6556416,158818745,0.264,1.64e-33,3
118	9	Unweighted	5	136080675	136080836	OBP2B	Trans-CDS	1.93928e-05	2.39008e-14	0.193155	3.89556e-16	0.00199057	8.38805e-14	1.96556e-12	3.89556e-16	3	3	17	62399864	62491136	PECAM1	CVD3_194_PECAM-1	Yes	Primary,Trans,9,9:136151579,136151579,0.151,7.87e-28,17	Conditional 1,Trans,9,rs77693339,136128558,0.096,6.80e-13,17
78	6	Commonrare	5	31683238	31683441	XXbac-BPG32J3.19	Trans-Flank	0.0185196	1.45035e-17	2.76248e-16	0.0104919	1.22853e-10	0.00729321	1.47529e-06	1.45035e-17	200	193	4	3508102	3534286	LRPAP1	NEU_127_Alpha-2-MRAP	Yes - Rare	Primary,Trans,6,rs113617295,30719481,0.010,2.23e-12,4
40	3	Commonrare	5	98216979	98217067	CLDND1	Trans-Flank	3.05262e-09	7.67229e-19	0.00300777	1.94387e-08	2.42762e-08	3.36483e-12	9.56275e-11	7.67229e-19	117	135	5	180028505	180076624	FLT4	ONC2_190_VEGFR-3	Yes	Primary,Trans,3,rs10935473,98416900,0.472,2.26e-38,5
132	9	Eigen/CADD-weighted	5	136243304	136243471	STKLD1	Trans-CDS	2.9955e-20	1.44866e-06	0.0615658	6.92709e-08	0.123614	2.53689e-08	6.35689e-06	2.9955e-20	6	15	1	169691781	169733846	SELE	CVD3_136_SELE	Yes	Primary,Trans,9,9:136141870,136141870,0.151,7.35e-68,1
137	3	Commonrare	5	98216484	98217515	OR5K2	Trans-Flank	4.36873e-11	9.77992e-21	0.000156819	1.76291e-09	1.19418e-10	6.11491e-14	6.6601e-13	9.77992e-21	110	126	19	51628164	51639908	SIGLEC9	NEU_109_Siglec-9	Yes	Primary,Trans,3,rs10935473,98416900,0.472,1.14e-53,19
6	1	Commonrare	5	159409508	159410551	OR10J1	Trans-CDS	1.83528e-12	7.46042e-22	0.00473741	4.77822e-12	0.0144485	5.34921e-14	4.01797e-14	7.46042e-22	6	3	17	32683470	32685629	CCL13	INF_136_MCP-4	Yes	Primary,Trans,1,rs12075,159175354,0.472,1.41e-54,17
153	19	MAF weight - B(1,5)	5	44101220	44101385	ZNF576	Trans-Flank	3.17658e-15	6.02689e-23	1.67677e-06	3.33643e-14	1.3737e-16	5.32519e-23	6.37188e-21	5.32519e-23	137	119	8	22941867	22974950	TNFRSF10C	CVD3_134_TNFRSF10C	Yes	Primary,Trans,19,rs4760,44153100,0.139,6.49e-90,8
50	3	Commonrare	5	98216484	98217515	OR5K2	Trans-Flank	3.59321e-17	1.85618e-31	1.38807e-05	2.73059e-14	1.44171e-14	9.21815e-20	4.97626e-19	1.85618e-31	112	126	17	62079953	62097994	ICAM2	CVD3_188_ICAM-2	Yes	Primary,Trans,3,rs11927405,98402969,0.471,1.64e-51,17
27	9	Commonrare	5	135973933	135974189	RALGDS	Trans-Flank	3.31707e-15	1.57676e-33	0.0108618	1.93917e-21	5.26447e-07	1.39795e-29	3.64779e-27	1.57676e-33	274	291	16	66400524	66438689	CDH5	CVD3_127_CDH5	Yes	Primary,Trans,9,rs77693339,136128558,0.096,2.9e-56,16
45	1	Commonrare	5	109792661	109796051	CELSR2	Trans-Flank	2.37993e-26	6.22831e-34	5.86374e-05	3.76532e-26	7.89831e-06	4.86681e-20	1.57694e-29	6.22831e-34	174	143	17	42422453	42430470	GRN	CVD3_118_GRN	Yes	Primary,Trans,1,rs12740374,109817590,0.216,3.26e-42,17
18	3	Commonrare	5	46414353	46415492	CCR5	Trans-Flank	2.1777e-38	1.6285e-42	0.0122501	4.86028e-37	0.0210471	6.39032e-16	6.30401e-29	1.6285e-42	100	143	17	34430982	34433014	CCL4	INF_130_CCL4	Yes	Primary,Trans,3,rs113341849,46384204,0.234,3.16e-44,17
103	3	Commonrare	5	52867299	52867486	MUSTN1	Trans-Flank	4.86778e-41	1.37913e-57	0.000601328	4.67052e-42	3.88719e-05	1.70584e-15	2.09477e-46	1.37913e-57	101	106	3	154741912	154901518	MME	NEU_143_NEP	Yes	Primary,Trans,3,rs35004449,52852897,0.369,2.54e-55,3
156	1	Commonrare	6	1567557	1567793	MMP23B	Trans-Flank	0.0475466	2.62306e-10	2.11173e-05	0.0336615	0.0160144	0.00361277	0.00889347	2.62306e-10	183	138	1	175284329	175712906	TNR	NEU_193_TN-R	No
144	9	Commonrare	6	136208314	136208584	MED22	Trans-Flank	1.72459e-06	2.11038e-10	0.00348232	1.31234e-07	0.0611482	2.25725e-09	6.72292e-07	2.11038e-10	214	348	9	27109138	27230173	TEK	CVD2_122_TIE2	Yes	Primary,Trans,9,rs77693339,136128558,0.094,4.56e-20,9
40	3	Eigen/CADD-weighted	6	97805976	97806986	OR5AC2	Trans-CDS	1.74013e-10	2.24172e-08	0.0415039	3.30296e-09	0.696349	0.064054	0.0001504	1.74013e-10	2	6	5	180028505	180076624	FLT4	ONC2_190_VEGFR-3	Yes	Primary,Trans,3,rs10935473,98416900,0.472,2.26e-38,5
6	1	Commonrare	6	159683274	159683433	CRP	Trans-Flank	0.329636	1.39508e-10	3.39635e-07	0.287685	0.00013875	0.00507213	0.0157388	1.39508e-10	42	47	17	32683470	32685629	CCL13	INF_136_MCP-4	Yes	Primary,Trans,1,rs12075,159175354,0.472,1.41e-54,17
143	6	Commonrare	6	32709180	32709342	HLA-DQA2	Trans-Flank	6.47704e-05	9.20971e-11	0.000301655	5.70579e-05	0.000891192	0.00109322	3.95503e-05	9.20971e-11	164	878	9	27109138	27230173	TEK	CVD2_122_TIE2	Yes	Primary,Trans,6,rs34277309,31329245,0.284,1.19e-17,9
137	3	Commonrare	6	99509486	99509894	COL8A1	Trans-Flank	0.0476099	6.91341e-11	6.32046e-07	0.0321296	2.2608e-06	0.00201442	0.00608825	6.91341e-11	90	69	19	51628164	51639908	SIGLEC9	NEU_109_Siglec-9	Yes	Primary,Trans,3,rs10935473,98416900,0.472,1.14e-53,19
115	5	Commonrare	6	176882028	176882535	PRR7	Trans-Flank	8.41604e-06	6.44676e-11	1.71655e-05	2.55862e-05	0.000587825	4.26281e-05	5.36784e-07	6.44676e-11	242	138	2	206546713	206662857	NRP2	NEU_102_NRP2	Yes	Primary,Trans,5,rs2545801,176841339,0.328,1.28e-14,2
50	3	MAF weight - B(1,5)	6	97705486	97705866	GABRR3	Trans-Flank	5.72266e-06	1.90126e-10	0.0747331	7.64321e-06	0.000880145	6.19694e-11	7.01317e-07	6.19694e-11	52	65	17	62079953	62097994	ICAM2	CVD3_188_ICAM-2	Yes	Primary,Trans,3,rs11927405,98402969,0.471,1.64e-51,17
144	9	Commonrare	6	136198664	136199224	SURF6	Trans-Flank	1.10535e-06	3.82971e-11	0.00400013	2.27218e-08	0.0477083	3.20486e-09	4.04113e-07	3.82971e-11	212	343	9	27109138	27230173	TEK	CVD2_122_TIE2	Yes	Primary,Trans,9,rs77693339,136128558,0.094,4.56e-20,9
119	9	Commonrare	6	136198664	136199224	SURF6	Trans-Flank	1.38061e-08	3.17933e-11	0.0673011	3.50987e-09	0.004581	1.07895e-08	1.58736e-07	3.17933e-11	211	343	7	131185020	131242976	PODXL	ONC2_127_PODXL	Yes	Primary,Trans,9,9:136141870,136141870,0.155,1.67e-28,7
16	6	MAF weight - B(1,5)	6	32709180	32709342	HLA-DQA2	Trans-Flank	3.53739e-09	7.58915e-10	0.340199	1.19177e-08	0.00437829	3.14078e-11	2.65909e-10	3.14078e-11	164	878	9	34689563	34691274	CCL19	INF_145_CCL19	Yes	Primary,Trans,6,6:32668773,32668773,0.158,5.22e-20,9
96	11	Commonrare	6	123624247	123625266	OR6X1	Trans-Flank	0.018946	1.72541e-11	4.35713e-07	0.0256806	0.0202651	0.0757593	0.0154416	1.72541e-11	43	85	19	43964938	43969812	LYPD3	ONC2_126_LYPD3	No
90	7	Commonrare	6	64451549	64453444	ERV3-1	Trans-Flank	0.0801845	7.71768e-12	0.00022647	0.096763	0.000865392	0.00162237	0.00940765	7.71768e-12	53	95	19	43964938	43969812	LYPD3	ONC2_126_LYPD3	No
113	2	Commonrare	6	242752483	242752596	NEU4	Trans-Flank	7.71465e-10	1.68336e-12	7.65588e-07	2.34741e-09	2.07899e-05	2.48563e-05	1.66141e-07	1.68336e-12	265	487	19	8959519	9092018	MUC16	ONC2_191_MUC-16	Yes	Primary,Trans,2,rs62193069,242730565,0.140,4.10e-17,19
140	12	Commonrare	6	102140901	102141059	GNPTAB	Trans-CDS	0.00271839	6.9304e-13	9.39121e-05	3.25159e-06	0.039327	0.0018874	2.2766e-06	6.9304e-13	10	6	11	6411660	6416228	SMPD1	NEU_125_SMPD1	Yes	Primary,Trans,12,rs4764809,102096012,0.482,3.81e-10,11
163	3	Rare only	6	52870599	52870691	TMEM110	Trans-Flank	0.217717	5.47598e-08	6.66478e-13	0.276549	2.27056e-05	0.0232601	0.0333676	6.66478e-13	116	114	7	49813256	49961546	VWC2	NEU_108_VWC2	Yes - Rare	Primary,Trans,3,rs139719930,52859916,0.019,3.01e-24,7
30	12	Commonrare	6	102140901	102141059	GNPTAB	Trans-CDS	0.00299255	3.76864e-13	0.000678548	4.28368e-07	0.00403792	5.87804e-06	2.85852e-07	3.76864e-13	10	6	20	57570239	57582302	CTSZ	CVD3_185_CTSZ	Yes	Primary,Trans,12,rs975431,102185145,0.217,7.48e-22,20
120	19	Commonrare	6	49224014	49224294	RASIP1	Trans-Flank	8.87345e-11	9.92039e-14	0.0364842	6.41801e-10	0.379782	2.1961e-06	1.31736e-10	9.92039e-14	163	171	16	2762418	2770552	PRSS27	CVD2_121_PRSS27	Yes	Primary,Trans,19,rs679574,49206108,0.282,1.44e-14,16
118	9	MAF weight - B(1,5)	6	136130948	136131097	ABO	Trans-CDS	6.72396e-08	1.09218e-11	0.316025	6.18574e-06	0.000439933	3.79433e-14	1.86061e-10	3.79433e-14	10	25	17	62399864	62491136	PECAM1	CVD3_194_PECAM-1	Yes	Primary,Trans,9,9:136151579,136151579,0.151,7.87e-28,17	Conditional 1,Trans,9,rs77693339,136128558,0.096,6.80e-13,17
52	9	Eigen/CADD-weighted	6	136243304	136243471	STKLD1	Trans-CDS	9.59788e-15	3.49068e-05	0.557149	7.70615e-08	0.172603	5.01237e-06	8.49756e-05	9.59788e-15	6	15	17	62079953	62097994	ICAM2	CVD3_188_ICAM-2	Yes	Primary,Trans,9,9:136138765,136138765,0.151,3.83e-44,17
57	5	Commonrare	6	158126078	158126190	EBF1	Trans-Flank	3.95231e-06	1.96032e-15	4.75463e-05	1.80188e-06	0.00122103	1.68062e-07	5.35507e-08	1.96032e-15	398	317	3	159706536	159713806	IL12A	NEU_186_IL-12B	Yes	Primary,Trans,5,rs6556416,158818745,0.264,1.64e-33,3
78	6	Commonrare	6	31680077	31680357	LY6G6E	Trans-Flank	0.0145144	1.70765e-17	2.70094e-16	0.010672	5.48565e-11	0.00808203	1.49843e-06	1.70765e-17	199	190	4	3508102	3534286	LRPAP1	NEU_127_Alpha-2-MRAP	Yes - Rare	Primary,Trans,6,rs113617295,30719481,0.010,2.23e-12,4
6	1	Commonrare	6	159409508	159410551	OR10J1	Trans-Flank	5.44962e-12	1.55016e-17	0.00268034	7.92701e-13	0.00215956	1.61867e-13	8.37618e-13	1.55016e-17	51	34	17	32683470	32685629	CCL13	INF_136_MCP-4	Yes	Primary,Trans,1,rs12075,159175354,0.472,1.41e-54,17
40	3	Commonrare	6	98518175	98518725	DCBLD2	Trans-Flank	5.14192e-11	8.0941e-19	0.000712399	5.32577e-11	5.22636e-05	2.80918e-08	5.11801e-14	8.0941e-19	113	154	5	180028505	180076624	FLT4	ONC2_190_VEGFR-3	Yes	Primary,Trans,3,rs10935473,98416900,0.472,2.26e-38,5
132	9	MAF weight - B(1,5)	6	136243304	136243471	STKLD1	Trans-Flank	6.01615e-17	1.71758e-15	3.70221e-05	1.24312e-17	0.00771243	4.31579e-20	2.7439e-17	4.31579e-20	254	361	1	169691781	169733846	SELE	CVD3_136_SELE	Yes	Primary,Trans,9,9:136141870,136141870,0.151,7.35e-68,1
137	3	Commonrare	6	98518175	98518725	DCBLD2	Trans-Flank	1.64535e-13	3.24734e-20	0.0136126	2.70173e-13	4.78864e-08	7.20288e-09	8.48629e-18	3.24734e-20	113	154	19	51628164	51639908	SIGLEC9	NEU_109_Siglec-9	Yes	Primary,Trans,3,rs10935473,98416900,0.472,1.14e-53,19
153	19	MAF weight - B(1,5)	6	44096137	44097559	IRGQ	Trans-Flank	3.26048e-15	1.9149e-21	0.000140034	3.58274e-14	4.27145e-15	1.26397e-22	1.45049e-20	1.26397e-22	136	118	8	22941867	22974950	TNFRSF10C	CVD3_134_TNFRSF10C	Yes	Primary,Trans,19,rs4760,44153100,0.139,6.49e-90,8
50	3	Commonrare	6	98188380	98189387	OR5K1	Trans-Flank	9.26163e-16	4.53785e-30	3.01205e-06	3.13334e-13	8.24561e-13	4.44162e-15	3.85327e-16	4.53785e-30	96	103	17	62079953	62097994	ICAM2	CVD3_188_ICAM-2	Yes	Primary,Trans,3,rs11927405,98402969,0.471,1.64e-51,17
27	9	Commonrare	6	136198664	136199224	SURF6	Trans-Flank	6.89753e-24	6.79125e-31	0.0512375	6.51096e-27	0.00341628	9.22788e-27	5.13521e-24	6.79125e-31	215	343	16	66400524	66438689	CDH5	CVD3_127_CDH5	Yes	Primary,Trans,9,rs77693339,136128558,0.096,2.9e-56,16
45	1	Commonrare	6	109836820	109836911	MYBPHL	Trans-Flank	2.46893e-26	3.31714e-33	4.1037e-05	2.56311e-22	8.89052e-06	2.14533e-20	1.31335e-26	3.31714e-33	176	130	17	42422453	42430470	GRN	CVD3_118_GRN	Yes	Primary,Trans,1,rs12740374,109817590,0.216,3.26e-42,17
18	3	Commonrare	6	46398978	46399423	CCR2	Trans-Flank	1.74459e-37	1.15717e-41	0.0136012	3.8109e-36	0.0255196	1.06563e-15	3.1758e-28	1.15717e-41	94	139	17	34430982	34433014	CCL4	INF_130_CCL4	Yes	Primary,Trans,3,rs113341849,46384204,0.234,3.16e-44,17
103	3	Commonrare	6	52828779	52828952	ITIH3	Trans-Flank	1.1844e-37	9.71683e-56	0.000621217	2.17297e-39	2.27789e-05	5.39702e-18	2.04478e-43	9.71683e-56	120	110	3	154741912	154901518	MME	NEU_143_NEP	Yes	Primary,Trans,3,rs35004449,52852897,0.369,2.54e-55,3
156	1	Rare only	7	1853685	1853867	CFAP74	Trans-Flank	0.29205	1.08492e-07	2.63296e-10	0.202018	0.00170211	0.00857587	0.0110849	2.63296e-10	285	335	1	175284329	175712906	TNR	NEU_193_TN-R	No
90	7	Commonrare	7	64437244	64437641	ZNF117	Trans-Flank	0.114759	1.74163e-10	0.000655398	0.138957	0.00119082	0.00133852	0.0154646	1.74163e-10	66	129	19	43964938	43969812	LYPD3	ONC2_126_LYPD3	No
16	6	Unweighted	7	32256358	32256486	C6orf10	Trans-Flank	1.28362e-10	2.00182e-07	0.273388	1.01177e-10	0.0787701	5.47121e-07	5.17519e-10	1.01177e-10	165	449	9	34689563	34691274	CCL19	INF_145_CCL19	Yes	Primary,Trans,6,6:32668773,32668773,0.158,5.22e-20,9
50	3	Commonrare	7	99509486	99509894	COL8A1	Trans-Flank	0.0568467	8.86485e-11	4.05578e-08	0.0375289	2.62241e-07	0.000830786	0.000586939	8.86485e-11	93	69	17	62079953	62097994	ICAM2	CVD3_188_ICAM-2	Yes	Primary,Trans,3,rs11927405,98402969,0.471,1.64e-51,17
115	5	Commonrare	7	176884393	176884544	DBN1	Trans-Flank	8.42242e-06	7.47242e-11	1.70431e-05	2.55552e-05	0.000865925	0.000108375	6.00879e-07	7.47242e-11	253	142	2	206546713	206662857	NRP2	NEU_102_NRP2	Yes	Primary,Trans,5,rs2545801,176841339,0.328,1.28e-14,2
119	9	Commonrare	7	136218727	136218877	SURF1	Trans-Flank	7.41615e-08	6.82467e-11	0.0589721	3.84479e-08	0.00431311	3.05278e-09	9.32e-08	6.82467e-11	208	339	7	131185020	131242976	PODXL	ONC2_127_PODXL	Yes	Primary,Trans,9,9:136141870,136141870,0.155,1.67e-28,7
50	3	MAF weight - B(1,5)	7	97805976	97806986	OR5AC2	Trans-Flank	3.05696e-06	3.08782e-10	0.00901759	7.60896e-06	0.0108726	6.48553e-11	6.71298e-07	6.48553e-11	32	59	17	62079953	62097994	ICAM2	CVD3_188_ICAM-2	Yes	Primary,Trans,3,rs11927405,98402969,0.471,1.64e-51,17
50	3	Eigen/CADD-weighted	7	97805976	97806986	OR5AC2	Trans-CDS	3.48114e-11	3.82793e-06	0.522226	1.17591e-10	0.972018	0.0426116	6.34149e-05	3.48114e-11	2	6	17	62079953	62097994	ICAM2	CVD3_188_ICAM-2	Yes	Primary,Trans,3,rs11927405,98402969,0.471,1.64e-51,17
140	12	Commonrare	7	102091599	102091952	CHPT1	Trans-CDS	0.000130815	2.16648e-11	0.000256799	3.89374e-07	0.0464178	0.000428385	3.04259e-07	2.16648e-11	2	5	11	6411660	6416228	SMPD1	NEU_125_SMPD1	Yes	Primary,Trans,12,rs4764809,102096012,0.482,3.81e-10,11
96	11	Commonrare	7	133711893	133712040	SPATA19	Trans-Flank	0.00148719	1.85696e-11	0.0436212	0.00124387	0.363069	0.0244009	0.00230781	1.85696e-11	107	120	19	43964938	43969812	LYPD3	ONC2_126_LYPD3	No
30	12	Commonrare	7	102796244	102796384	IGF1	Trans-Flank	1.34693e-08	8.70894e-12	4.54422e-05	5.48654e-08	0.00420506	0.000647504	4.96902e-07	8.70894e-12	93	91	20	57570239	57582302	CTSZ	CVD3_185_CTSZ	Yes	Primary,Trans,12,rs975431,102185145,0.217,7.48e-22,20
120	19	Commonrare	7	49216483	49216847	MAMSTR	Trans-Flank	1.67582e-10	2.2022e-12	0.176008	8.43053e-10	0.557359	6.40905e-06	3.70538e-10	2.2022e-12	169	172	16	2762418	2770552	PRSS27	CVD2_121_PRSS27	Yes	Primary,Trans,19,rs679574,49206108,0.282,1.44e-14,16
113	2	Commonrare	7	242674599	242674971	D2HGDH	Trans-CDS	1.66021e-06	1.75475e-12	2.11204e-05	2.23851e-06	7.65367e-05	2.39284e-07	2.46665e-07	1.75475e-12	7	17	19	8959519	9092018	MUC16	ONC2_191_MUC-16	Yes	Primary,Trans,2,rs62193069,242730565,0.140,4.10e-17,19
163	3	Rare only	7	52867405	52867486	TMEM110-MUSTN1	Trans-Flank	0.219118	6.49584e-08	7.03331e-13	0.278875	2.57335e-05	0.023723	0.0353331	7.03331e-13	118	116	7	49813256	49961546	VWC2	NEU_108_VWC2	Yes - Rare	Primary,Trans,3,rs139719930,52859916,0.019,3.01e-24,7
118	9	MAF weight - B(1,5)	7	136325148	136325349	CACFD1	Trans-CDS	0.0339208	3.99754e-11	0.416854	1.83828e-06	0.0171132	3.92246e-14	6.31008e-09	3.92246e-14	5	3	17	62399864	62491136	PECAM1	CVD3_194_PECAM-1	Yes	Primary,Trans,9,9:136151579,136151579,0.151,7.87e-28,17	Conditional 1,Trans,9,rs77693339,136128558,0.096,6.80e-13,17
52	9	Unweighted	7	136208314	136208584	MED22	Trans-Flank	1.80829e-14	5.07766e-12	0.118234	1.01566e-14	0.0427215	1.02961e-12	2.53589e-12	1.01566e-14	217	348	17	62079953	62097994	ICAM2	CVD3_188_ICAM-2	Yes	Primary,Trans,9,9:136138765,136138765,0.151,3.83e-44,17
57	5	Commonrare	7	158695883	158696117	UBLCP1	Trans-CDS	6.05172e-05	8.06307e-15	0.0553826	2.57876e-09	4.36366e-05	1.74177e-06	9.10467e-09	8.06307e-15	1	2	3	159706536	159713806	IL12A	NEU_186_IL-12B	Yes	Primary,Trans,5,rs6556416,158818745,0.264,1.64e-33,3
6	1	Unweighted	7	159283419	159284489	OR10J3	Trans-Flank	3.78048e-15	1.18862e-14	0.000325395	1.69254e-16	1.02886e-05	1.22333e-12	2.7671e-15	1.69254e-16	35	38	17	32683470	32685629	CCL13	INF_136_MCP-4	Yes	Primary,Trans,1,rs12075,159175354,0.472,1.41e-54,17
78	6	Commonrare	7	31679838	31679932	XXbac-BPG32J3.20	Trans-Flank	0.0145144	1.70765e-17	2.70094e-16	0.010672	5.48565e-11	0.00808203	1.49843e-06	1.70765e-17	199	190	4	3508102	3534286	LRPAP1	NEU_127_Alpha-2-MRAP	Yes - Rare	Primary,Trans,6,rs113617295,30719481,0.010,2.23e-12,4
40	3	Commonrare	7	98109469	98110515	OR5K3	Trans-Flank	1.11329e-10	2.47074e-18	1.27237e-05	6.40095e-11	1.40598e-07	1.59597e-07	2.46356e-11	2.47074e-18	33	51	5	180028505	180076624	FLT4	ONC2_190_VEGFR-3	Yes	Primary,Trans,3,rs10935473,98416900,0.472,2.26e-38,5
132	9	Commonrare	7	136080675	136080836	OBP2B	Trans-CDS	1.02413e-05	1.2679e-19	0.664672	1.5168e-12	3.99454e-07	1.43462e-17	6.31904e-15	1.2679e-19	3	3	1	169691781	169733846	SELE	CVD3_136_SELE	Yes	Primary,Trans,9,9:136141870,136141870,0.151,7.35e-68,1
137	3	Commonrare	7	98188380	98189387	OR5K1	Trans-Flank	7.96253e-11	6.25887e-20	7.09864e-05	3.32503e-09	1.10667e-07	8.46428e-11	2.7016e-11	6.25887e-20	94	103	19	51628164	51639908	SIGLEC9	NEU_109_Siglec-9	Yes	Primary,Trans,3,rs10935473,98416900,0.472,1.14e-53,19
153	19	MAF weight - B(1,5)	7	44081231	44081453	PINLYP	Trans-Flank	2.99562e-15	2.31713e-21	0.000168675	3.59144e-14	8.60659e-15	7.53166e-22	1.94336e-20	7.53166e-22	134	115	8	22941867	22974950	TNFRSF10C	CVD3_134_TNFRSF10C	Yes	Primary,Trans,19,rs4760,44153100,0.139,6.49e-90,8
50	3	Commonrare	7	98518175	98518725	DCBLD2	Trans-Flank	2.1597e-17	1.15735e-23	0.0102211	2.76032e-17	4.57567e-05	3.34535e-08	2.86741e-20	1.15735e-23	117	152	17	62079953	62097994	ICAM2	CVD3_188_ICAM-2	Yes	Primary,Trans,3,rs11927405,98402969,0.471,1.64e-51,17
27	9	Commonrare	7	136208314	136208584	MED22	Trans-Flank	4.51367e-23	2.23893e-29	0.0464175	6.83994e-26	0.0053674	6.43232e-25	4.38171e-23	2.23893e-29	217	348	16	66400524	66438689	CDH5	CVD3_127_CDH5	Yes	Primary,Trans,9,rs77693339,136128558,0.096,2.9e-56,16
45	1	Commonrare	7	109792661	109796051	CELSR2	Trans-CDS	1.84007e-22	8.63284e-32	0.000275491	7.81619e-18	0.000205002	3.81394e-22	1.78882e-23	8.63284e-32	29	18	17	42422453	42430470	GRN	CVD3_118_GRN	Yes	Primary,Trans,1,rs12740374,109817590,0.216,3.26e-42,17
18	3	Unweighted	7	46398978	46399423	CCR2	Trans-CDS	5.61949e-35	1.06606e-32	0.998183	3.438e-35	0.702568	2.65015e-21	2.71379e-31	3.438e-35	1	3	17	34430982	34433014	CCL4	INF_130_CCL4	Yes	Primary,Trans,3,rs113341849,46384204,0.234,3.16e-44,17
103	3	Commonrare	7	52939111	52939332	SFMBT1	Trans-Flank	8.17604e-43	3.7975e-55	0.000934746	2.62864e-42	6.10702e-05	3.44375e-15	8.71374e-47	3.7975e-55	102	113	3	154741912	154901518	MME	NEU_143_NEP	Yes	Primary,Trans,3,rs35004449,52852897,0.369,2.54e-55,3
50	3	Commonrare	8	97887503	97888525	OR5H15	Trans-CDS	8.48821e-05	2.06014e-10	0.303841	0.00128457	0.000985826	4.74764e-06	4.95922e-05	2.06014e-10	4	8	17	62079953	62097994	ICAM2	CVD3_188_ICAM-2	Yes	Primary,Trans,3,rs11927405,98402969,0.471,1.64e-51,17
119	9	MAF weight - B(1,5)	8	136230299	136230391	SURF4	Trans-Flank	2.2185e-08	4.28824e-08	0.0205298	3.88668e-10	0.00451922	1.99072e-10	6.33275e-08	1.99072e-10	226	336	7	131185020	131242976	PODXL	ONC2_127_PODXL	Yes	Primary,Trans,9,9:136141870,136141870,0.155,1.67e-28,7
90	7	Commonrare	8	71252719	71252927	CALN1	Trans-Flank	0.231215	1.91553e-10	0.000174632	0.268959	0.397816	0.316383	0.434296	1.91553e-10	133	121	19	43964938	43969812	LYPD3	ONC2_126_LYPD3	No
115	5	Commonrare	8	176853806	176853938	GRK6	Trans-Flank	7.6513e-06	7.78806e-11	1.86026e-05	2.19639e-05	0.000301995	1.6043e-05	3.39545e-07	7.78806e-11	253	144	2	206546713	206662857	NRP2	NEU_102_NRP2	Yes	Primary,Trans,5,rs2545801,176841339,0.328,1.28e-14,2
96	11	Commonrare	8	123676075	123677097	OR6M1	Trans-Flank	0.0161144	5.75634e-11	4.59599e-07	0.0275423	0.0100441	0.0390429	0.00978001	5.75634e-11	36	74	19	43964938	43969812	LYPD3	ONC2_126_LYPD3	No
30	12	Commonrare	8	102590389	102590519	PMCH	Trans-Flank	7.02934e-06	5.66372e-11	0.00136132	7.55023e-06	1.79177e-05	3.29088e-05	3.6279e-07	5.66372e-11	59	72	20	57570239	57582302	CTSZ	CVD3_185_CTSZ	Yes	Primary,Trans,12,rs975431,102185145,0.217,7.48e-22,20
120	19	Commonrare	8	49206173	49206913	FUT2	Trans-Flank	2.8346e-10	5.23379e-12	0.292662	1.37916e-09	0.69757	8.56106e-06	7.84398e-10	5.23379e-12	176	170	16	2762418	2770552	PRSS27	CVD2_121_PRSS27	Yes	Primary,Trans,19,rs679574,49206108,0.282,1.44e-14,16
113	2	Commonrare	8	242716330	242716439	GAL3ST2	Trans-Flank	1.06409e-09	3.43133e-12	9.03841e-07	7.62111e-08	0.000317969	6.35143e-05	3.31046e-07	3.43133e-12	263	506	19	8959519	9092018	MUC16	ONC2_191_MUC-16	Yes	Primary,Trans,2,rs62193069,242730565,0.140,4.10e-17,19
6	1	Commonrare	8	155108107	155108196	SLC50A1	Trans-CDS	4.17449e-05	1.00317e-12	0.00416359	1.99887e-05	6.87536e-05	1.78293e-05	3.47308e-05	1.00317e-12	1	1	17	32683470	32685629	CCL13	INF_136_MCP-4	Yes	Primary,Trans,1,rs12075,159175354,0.472,1.41e-54,17
118	9	Commonrare	8	136198664	136199224	SURF6	Trans-Flank	6.57437e-12	8.55819e-13	0.179579	8.54524e-12	0.0560228	1.3938e-12	1.03105e-10	8.55819e-13	215	343	17	62399864	62491136	PECAM1	CVD3_194_PECAM-1	Yes	Primary,Trans,9,9:136151579,136151579,0.151,7.87e-28,17	Conditional 1,Trans,9,rs77693339,136128558,0.096,6.80e-13,17
163	3	Rare only	8	52867299	52867486	MUSTN1	Trans-Flank	0.211896	3.78795e-08	7.49789e-13	0.268401	3.54462e-06	0.0176677	0.0263742	7.49789e-13	101	106	7	49813256	49961546	VWC2	NEU_108_VWC2	Yes - Rare	Primary,Trans,3,rs139719930,52859916,0.019,3.01e-24,7
57	5	Commonrare	8	159343872	159344901	ADRA1B	Trans-CDS	4.13148e-08	3.39753e-14	0.653086	5.6925e-08	8.70967e-08	9.72352e-09	3.26646e-08	3.39753e-14	2	3	3	159706536	159713806	IL12A	NEU_186_IL-12B	Yes	Primary,Trans,5,rs6556416,158818745,0.264,1.64e-33,3
52	9	Unweighted	8	136198664	136199224	SURF6	Trans-Flank	1.40569e-14	4.32055e-12	0.0965396	1.02764e-14	0.0392775	1.32946e-12	3.95641e-12	1.02764e-14	215	343	17	62079953	62097994	ICAM2	CVD3_188_ICAM-2	Yes	Primary,Trans,9,9:136138765,136138765,0.151,3.83e-44,17
137	3	Commonrare	8	98518175	98518725	DCBLD2	Trans-CDS	6.55238e-13	4.38375e-17	0.210568	8.6954e-13	4.75291e-08	2.75476e-05	3.05481e-11	4.38375e-17	6	7	19	51628164	51639908	SIGLEC9	NEU_109_Siglec-9	Yes	Primary,Trans,3,rs10935473,98416900,0.472,1.14e-53,19
78	6	Commonrare	8	31683092	31683227	LY6G6D	Trans-Flank	0.0187805	1.76607e-17	2.76248e-16	0.0111911	1.22853e-10	0.00733798	1.85162e-06	1.76607e-17	200	195	4	3508102	3534286	LRPAP1	NEU_127_Alpha-2-MRAP	Yes - Rare	Primary,Trans,6,rs113617295,30719481,0.010,2.23e-12,4
40	3	Commonrare	8	98072657	98073703	OR5K4	Trans-Flank	2.44787e-10	1.54249e-17	0.000106954	4.36667e-10	5.99956e-05	1.87718e-06	4.8823e-10	1.54249e-17	31	53	5	180028505	180076624	FLT4	ONC2_190_VEGFR-3	Yes	Primary,Trans,3,rs10935473,98416900,0.472,2.26e-38,5
132	9	Unweighted	8	136223428	136223586	SURF2	Trans-Flank	3.8024e-18	1.21555e-16	0.0013788	5.18504e-19	0.0175554	1.18377e-17	2.40966e-16	5.18504e-19	206	339	1	169691781	169733846	SELE	CVD3_136_SELE	Yes	Primary,Trans,9,9:136141870,136141870,0.151,7.35e-68,1
153	19	MAF weight - B(1,25)	8	44150568	44150740	PLAUR	Trans-Flank	4.27608e-12	2.70704e-18	7.52948e-07	7.00214e-11	7.88868e-21	1.43131e-17	1.50254e-16	7.88868e-21	165	144	8	22941867	22974950	TNFRSF10C	CVD3_134_TNFRSF10C	Yes	Primary,Trans,19,rs4760,44153100,0.139,6.49e-90,8
50	3	Commonrare	8	98518175	98518725	DCBLD2	Trans-CDS	1.46328e-18	2.13613e-23	0.371189	9.66134e-19	7.04068e-06	5.3935e-06	5.3648e-16	2.13613e-23	7	7	17	62079953	62097994	ICAM2	CVD3_188_ICAM-2	Yes	Primary,Trans,3,rs11927405,98402969,0.471,1.64e-51,17
45	1	Commonrare	8	109856624	109856719	SORT1	Trans-Flank	3.04097e-15	2.39924e-25	2.44722e-05	3.03782e-11	2.09343e-06	3.48817e-22	4.9926e-16	2.39924e-25	226	160	17	42422453	42430470	GRN	CVD3_118_GRN	Yes	Primary,Trans,1,rs12740374,109817590,0.216,3.26e-42,17
27	9	Commonrare	8	136215058	136215141	RPL7A	Trans-Flank	8.65374e-21	6.38132e-26	0.0610255	4.21726e-24	0.00796477	4.09474e-21	1.14724e-20	6.38132e-26	207	337	16	66400524	66438689	CDH5	CVD3_127_CDH5	Yes	Primary,Trans,9,rs77693339,136128558,0.096,2.9e-56,16
18	3	Commonrare	8	46560463	46560593	LRRC2	Trans-Flank	3.71184e-29	1.73281e-33	0.0850142	2.54848e-30	0.0180854	1.16124e-10	2.59069e-23	1.73281e-33	86	167	17	34430982	34433014	CCL4	INF_130_CCL4	Yes	Primary,Trans,3,rs113341849,46384204,0.234,3.16e-44,17
103	3	Commonrare	8	52811591	52811788	ITIH1	Trans-Flank	2.78939e-36	2.48716e-53	0.00053354	5.01523e-38	1.9201e-05	3.96003e-19	1.4026e-41	2.48716e-53	124	115	3	154741912	154901518	MME	NEU_143_NEP	Yes	Primary,Trans,3,rs35004449,52852897,0.369,2.54e-55,3
50	3	Commonrare	9	98109469	98110515	OR5K3	Trans-Flank	9.93511e-10	2.77485e-10	0.0239202	5.65094e-10	7.41734e-05	2.75603e-06	3.33236e-08	2.77485e-10	33	51	17	62079953	62097994	ICAM2	CVD3_188_ICAM-2	Yes	Primary,Trans,3,rs11927405,98402969,0.471,1.64e-51,17
119	9	Commonrare	9	136223428	136223586	SURF2	Trans-Flank	4.78295e-08	2.37701e-10	0.0211364	2.78281e-08	0.00399382	1.2863e-09	7.04558e-08	2.37701e-10	202	340	7	131185020	131242976	PODXL	ONC2_127_PODXL	Yes	Primary,Trans,9,9:136141870,136141870,0.155,1.67e-28,7
90	7	Commonrare	9	64363655	64363837	ZNF273	Trans-Flank	0.115683	2.2603e-10	0.000522049	0.131427	0.0014226	0.00118825	0.0135665	2.2603e-10	66	137	19	43964938	43969812	LYPD3	ONC2_126_LYPD3	No
115	5	Commonrare	9	176829252	176829500	F12	Trans-Flank	3.62932e-06	9.01683e-11	6.31638e-05	1.13776e-05	0.000444609	1.30152e-05	2.11815e-07	9.01683e-11	248	144	2	206546713	206662857	NRP2	NEU_102_NRP2	Yes	Primary,Trans,5,rs2545801,176841339,0.328,1.28e-14,2
113	2	Commonrare	9	242168975	242169142	HDLBP	Trans-CDS	0.00668176	8.24055e-11	1.05608e-06	3.61444e-05	3.46277e-07	9.03445e-07	1.0643e-06	8.24055e-11	12	12	19	8959519	9092018	MUC16	ONC2_191_MUC-16	Yes	Primary,Trans,2,rs62193069,242730565,0.140,4.10e-17,19
113	2	Commonrare	9	242793169	242793489	PDCD1	Trans-Flank	7.77202e-08	1.33722e-11	8.17143e-08	3.626e-07	5.38843e-05	4.23087e-05	3.87427e-07	1.33722e-11	236	458	19	8959519	9092018	MUC16	ONC2_191_MUC-16	Yes	Primary,Trans,2,rs62193069,242730565,0.140,4.10e-17,19
120	19	Unweighted	9	49224014	49224294	RASIP1	Trans-CDS	1.67928e-11	2.94736e-10	0.0768878	1.16344e-11	0.231506	0.000641286	1.28824e-06	1.16344e-11	9	3	16	2762418	2770552	PRSS27	CVD2_121_PRSS27	Yes	Primary,Trans,19,rs679574,49206108,0.282,1.44e-14,16
118	9	Commonrare	9	136208314	136208584	MED22	Trans-Flank	2.35596e-11	3.73346e-12	0.231465	3.77377e-11	0.0662848	4.59276e-12	2.73292e-10	3.73346e-12	217	348	17	62399864	62491136	PECAM1	CVD3_194_PECAM-1	Yes	Primary,Trans,9,9:136151579,136151579,0.151,7.87e-28,17	Conditional 1,Trans,9,rs77693339,136128558,0.096,6.80e-13,17
163	3	Rare only	9	52867122	52867303	RP5-966M1.6	Trans-Flank	0.211896	3.78795e-08	7.49789e-13	0.268401	3.54462e-06	0.0176677	0.0263742	7.49789e-13	101	106	7	49813256	49961546	VWC2	NEU_108_VWC2	Yes - Rare	Primary,Trans,3,rs139719930,52859916,0.019,3.01e-24,7
52	9	Commonrare	9	136399822	136400079	ADAMTSL2	Trans-Flank	5.1495e-11	1.60644e-14	0.00069079	1.92498e-10	4.185e-06	4.35167e-11	8.30181e-13	1.60644e-14	349	565	17	62079953	62097994	ICAM2	CVD3_188_ICAM-2	Yes	Primary,Trans,9,9:136138765,136138765,0.151,3.83e-44,17
137	3	Commonrare	9	98451667	98451895	ST3GAL6	Trans-CDS	9.87652e-13	2.69738e-16	0.276728	1.04652e-11	0.000604175	3.31466e-05	1.22309e-12	2.69738e-16	11	7	19	51628164	51639908	SIGLEC9	NEU_109_Siglec-9	Yes	Primary,Trans,3,rs10935473,98416900,0.472,1.14e-53,19
40	3	Commonrare	9	98216484	98217515	OR5K2	Trans-Flank	2.25339e-08	7.90361e-17	0.00340559	6.00296e-07	2.8407e-08	1.17911e-11	1.98727e-08	7.90361e-17	110	126	5	180028505	180076624	FLT4	ONC2_190_VEGFR-3	Yes	Primary,Trans,3,rs10935473,98416900,0.472,2.26e-38,5
78	6	Commonrare	9	31674643	31674775	LY6G6F	Trans-Flank	0.0145264	1.77148e-17	2.72247e-16	0.0107422	5.41229e-11	0.00782068	1.53132e-06	1.77148e-17	197	192	4	3508102	3534286	LRPAP1	NEU_127_Alpha-2-MRAP	Yes - Rare	Primary,Trans,6,rs113617295,30719481,0.010,2.23e-12,4
132	9	Commonrare	9	136379717	136379947	TMEM8C	Trans-Flank	2.3831e-11	6.3228e-19	2.94965e-08	1.02524e-10	6.12128e-08	3.54722e-17	2.85569e-16	6.3228e-19	260	460	1	169691781	169733846	SELE	CVD3_136_SELE	Yes	Primary,Trans,9,9:136141870,136141870,0.151,7.35e-68,1
50	3	Commonrare	9	98451667	98451895	ST3GAL6	Trans-CDS	8.10776e-14	5.54785e-19	0.675887	4.17556e-14	0.0360439	2.81663e-05	4.46719e-10	5.54785e-19	11	7	17	62079953	62097994	ICAM2	CVD3_188_ICAM-2	Yes	Primary,Trans,3,rs11927405,98402969,0.471,1.64e-51,17
153	19	Commonrare	9	44047503	44047697	XRCC1	Trans-Flank	1.47404e-14	9.00533e-21	3.47671e-05	1.99941e-13	3.75371e-15	4.0827e-20	2.82145e-19	9.00533e-21	143	139	8	22941867	22974950	TNFRSF10C	CVD3_134_TNFRSF10C	Yes	Primary,Trans,19,rs4760,44153100,0.139,6.49e-90,8
45	1	Commonrare	9	109648609	109648760	C1orf194	Trans-Flank	8.16335e-11	5.39593e-24	7.2993e-06	1.55629e-11	0.000955648	5.13312e-09	3.83734e-12	5.39593e-24	78	116	17	42422453	42430470	GRN	CVD3_118_GRN	Yes	Primary,Trans,1,rs12740374,109817590,0.216,3.26e-42,17
27	9	Commonrare	9	136218727	136218877	SURF1	Trans-Flank	8.81148e-21	1.41767e-24	0.0488772	4.22876e-24	0.00776506	6.52757e-21	2.02661e-20	1.41767e-24	213	338	16	66400524	66438689	CDH5	CVD3_127_CDH5	Yes	Primary,Trans,9,rs77693339,136128558,0.096,2.9e-56,16
18	3	Commonrare	9	46539512	46539747	RTP3	Trans-Flank	7.37446e-28	4.1363e-30	0.230262	1.84133e-29	0.023489	1.72971e-09	8.87866e-21	4.1363e-30	81	141	17	34430982	34433014	CCL4	INF_130_CCL4	Yes	Primary,Trans,3,rs113341849,46384204,0.234,3.16e-44,17
103	3	Commonrare	9	52847396	52847546	ITIH4	Trans-CDS	1.24026e-42	9.11383e-51	0.0587983	3.1353e-45	0.0146165	1.69053e-23	1.86423e-50	9.11383e-51	8	13	3	154741912	154901518	MME	NEU_143_NEP	Yes	Primary,Trans,3,rs35004449,52852897,0.369,2.54e-55,3
119	9	MAF weight - B(1,5)	10	136243304	136243471	STKLD1	Trans-Flank	7.79208e-08	7.77283e-08	0.00746765	3.59007e-08	0.00345715	2.49765e-10	1.08423e-07	2.49765e-10	248	363	7	131185020	131242976	PODXL	ONC2_127_PODXL	Yes	Primary,Trans,9,9:136141870,136141870,0.155,1.67e-28,7
118	9	Commonrare	10	136218727	136218877	SURF1	Trans-Flank	1.37868e-10	8.66332e-11	0.148542	1.33539e-10	0.0682531	1.01494e-10	4.94096e-08	8.66332e-11	213	338	17	62399864	62491136	PECAM1	CVD3_194_PECAM-1	Yes	Primary,Trans,9,9:136151579,136151579,0.151,7.87e-28,17	Conditional 1,Trans,9,rs77693339,136128558,0.096,6.80e-13,17
118	9	Eigen/CADD-weighted	10	136230299	136230391	SURF4	Trans-Flank	7.4065e-11	6.58044e-08	0.0529682	9.06111e-11	0.0906886	1.98702e-10	7.08637e-08	7.4065e-11	231	334	17	62399864	62491136	PECAM1	CVD3_194_PECAM-1	Yes	Primary,Trans,9,9:136151579,136151579,0.151,7.87e-28,17	Conditional 1,Trans,9,rs77693339,136128558,0.096,6.80e-13,17
118	9	Commonrare	10	136215058	136215141	RPL7A	Trans-Flank	1.29806e-10	2.34268e-11	0.131783	1.37912e-10	0.0680976	8.21142e-11	4.10713e-08	2.34268e-11	207	337	17	62399864	62491136	PECAM1	CVD3_194_PECAM-1	Yes	Primary,Trans,9,9:136151579,136151579,0.151,7.87e-28,17	Conditional 1,Trans,9,rs77693339,136128558,0.096,6.80e-13,17
120	19	Commonrare	10	49164893	49165338	NTN5	Trans-Flank	3.10302e-10	1.71347e-11	0.371558	7.19204e-08	0.784398	1.76667e-05	2.463e-09	1.71347e-11	189	189	16	2762418	2770552	PRSS27	CVD2_121_PRSS27	Yes	Primary,Trans,19,rs679574,49206108,0.282,1.44e-14,16
163	3	Rare only	10	52529389	52529547	STAB1	Trans-CDS	0.00179159	9.51807e-09	1.14325e-12	0.280936	1.39141e-06	0.00536927	0.00489991	1.14325e-12	26	17	7	49813256	49961546	VWC2	NEU_108_VWC2	Yes - Rare	Primary,Trans,3,rs139719930,52859916,0.019,3.01e-24,7
137	3	Eigen/CADD-weighted	10	97805976	97806986	OR5AC2	Trans-CDS	7.01419e-13	7.76335e-10	0.0807664	1.36832e-11	0.354627	0.00684754	4.48199e-06	7.01419e-13	2	6	19	51628164	51639908	SIGLEC9	NEU_109_Siglec-9	Yes	Primary,Trans,3,rs10935473,98416900,0.472,1.14e-53,19
50	3	Commonrare	10	98216979	98217067	CLDND1	Trans-CDS	1.03355e-07	8.00657e-14	0.00671661	7.20936e-08	0.0173637	3.23507e-05	8.94245e-07	8.00657e-14	2	2	17	62079953	62097994	ICAM2	CVD3_188_ICAM-2	Yes	Primary,Trans,3,rs11927405,98402969,0.471,1.64e-51,17
52	9	Unweighted	10	136218727	136218877	SURF1	Trans-Flank	4.41877e-14	2.35805e-11	0.0483792	1.75633e-14	0.0432659	6.05169e-12	8.26222e-12	1.75633e-14	213	338	17	62079953	62097994	ICAM2	CVD3_188_ICAM-2	Yes	Primary,Trans,9,9:136138765,136138765,0.151,3.83e-44,17
40	3	Commonrare	10	98188380	98189387	OR5K1	Trans-Flank	8.98648e-09	4.50546e-16	0.00164261	7.4886e-07	1.22386e-06	8.9991e-08	1.55558e-07	4.50546e-16	94	103	5	180028505	180076624	FLT4	ONC2_190_VEGFR-3	Yes	Primary,Trans,3,rs10935473,98416900,0.472,2.26e-38,5
78	6	Commonrare	10	31694933	31695170	DDAH2	Trans-Flank	0.0181474	1.93234e-17	1.43677e-16	0.00932308	4.22659e-08	0.0119448	1.553e-06	1.93234e-17	202	184	4	3508102	3534286	LRPAP1	NEU_127_Alpha-2-MRAP	Yes - Rare	Primary,Trans,6,rs113617295,30719481,0.010,2.23e-12,4
132	9	Commonrare	10	136215058	136215141	RPL7A	Trans-Flank	1.92607e-17	1.05653e-18	0.00479373	2.56126e-18	0.019237	4.62079e-17	4.80115e-16	1.05653e-18	207	337	1	169691781	169733846	SELE	CVD3_136_SELE	Yes	Primary,Trans,9,9:136141870,136141870,0.151,7.35e-68,1
153	19	Commonrare	10	44058803	44058996	L34079.2	Trans-Flank	1.584e-14	2.2959e-20	0.000171339	2.19959e-13	3.75754e-15	4.18202e-20	3.54278e-19	2.2959e-20	147	138	8	22941867	22974950	TNFRSF10C	CVD3_134_TNFRSF10C	Yes	Primary,Trans,19,rs4760,44153100,0.139,6.49e-90,8
27	9	Unweighted	10	136223428	136223586	SURF2	Trans-Flank	3.12436e-19	3.37543e-20	0.0160937	1.55265e-21	0.00868176	9.48931e-19	4.06762e-18	1.55265e-21	206	339	16	66400524	66438689	CDH5	CVD3_127_CDH5	Yes	Primary,Trans,9,rs77693339,136128558,0.096,2.9e-56,16
45	1	Commonrare	10	109836820	109836911	MYBPHL	Trans-CDS	1.11378e-15	8.39321e-24	6.72834e-05	1.23171e-11	3.96603e-08	1.33547e-17	1.34906e-17	8.39321e-24	5	8	17	42422453	42430470	GRN	CVD3_118_GRN	Yes	Primary,Trans,1,rs12740374,109817590,0.216,3.26e-42,17
18	3	Eigen/CADD-weighted	10	46477645	46477760	LTF	Trans-CDS	4.68213e-28	1.00632e-17	0.146034	8.75711e-14	0.104301	2.21991e-07	2.90348e-12	4.68213e-28	9	13	17	34430982	34433014	CCL4	INF_130_CCL4	Yes	Primary,Trans,3,rs113341849,46384204,0.234,3.16e-44,17
103	3	Commonrare	10	52745752	52745925	NEK4	Trans-Flank	4.93087e-35	3.79377e-49	0.00190144	6.18837e-36	0.000172644	6.57759e-19	2.0455e-39	3.79377e-49	135	114	3	154741912	154901518	MME	NEU_143_NEP	Yes	Primary,Trans,3,rs35004449,52852897,0.369,2.54e-55,3
119	9	Eigen/CADD-weighted	11	136243304	136243471	STKLD1	Trans-CDS	3.24702e-10	5.45785e-05	0.636254	7.53202e-05	0.0115718	2.23582e-05	0.000282253	3.24702e-10	6	15	7	131185020	131242976	PODXL	ONC2_127_PODXL	Yes	Primary,Trans,9,9:136141870,136141870,0.155,1.67e-28,7
118	9	Eigen/CADD-weighted	11	136243304	136243471	STKLD1	Trans-CDS	9.17029e-11	0.00016621	0.922392	2.24769e-07	0.308028	0.000225185	0.000627063	9.17029e-11	6	15	17	62399864	62491136	PECAM1	CVD3_194_PECAM-1	Yes	Primary,Trans,9,9:136151579,136151579,0.151,7.87e-28,17	Conditional 1,Trans,9,rs77693339,136128558,0.096,6.80e-13,17
45	1	MAF weight - B(1,5)	11	110026535	110026742	ATXN7L2	Trans-Flank	0.00299796	4.65768e-08	4.46879e-06	0.0022889	2.30762e-06	9.13988e-11	0.000143532	9.13988e-11	133	94	17	42422453	42430470	GRN	CVD3_118_GRN	Yes	Primary,Trans,1,rs12740374,109817590,0.216,3.26e-42,17
120	19	Commonrare	11	49298642	49298761	BCAT2	Trans-Flank	1.70811e-09	7.71777e-11	0.0129156	2.95447e-08	0.235203	0.00120933	9.57176e-07	7.71777e-11	136	204	16	2762418	2770552	PRSS27	CVD2_121_PRSS27	Yes	Primary,Trans,19,rs679574,49206108,0.282,1.44e-14,16
118	9	Eigen/CADD-weighted	11	136223428	136223586	SURF2	Trans-Flank	4.54572e-11	4.28201e-08	0.0993149	1.1731e-10	0.0699739	1.38356e-10	5.10518e-08	4.54572e-11	206	339	17	62399864	62491136	PECAM1	CVD3_194_PECAM-1	Yes	Primary,Trans,9,9:136151579,136151579,0.151,7.87e-28,17	Conditional 1,Trans,9,rs77693339,136128558,0.096,6.80e-13,17
163	3	Commonrare	11	53919544	53919628	SELENOK	Trans-Flank	0.144588	2.22226e-12	3.23499e-12	0.139618	2.6977e-07	6.90915e-05	0.000919174	2.22226e-12	95	109	7	49813256	49961546	VWC2	NEU_108_VWC2	Yes - Rare	Primary,Trans,3,rs139719930,52859916,0.019,3.01e-24,7
50	3	Commonrare	11	98216484	98217515	OR5K2	Trans-CDS	6.64245e-12	1.08821e-13	0.330713	3.2883e-12	0.00933969	4.13983e-11	3.87653e-09	1.08821e-13	2	3	17	62079953	62097994	ICAM2	CVD3_188_ICAM-2	Yes	Primary,Trans,3,rs11927405,98402969,0.471,1.64e-51,17
40	3	Commonrare	11	98451667	98451895	ST3GAL6	Trans-CDS	6.89697e-09	5.87613e-14	0.00208488	7.19292e-08	0.00220209	2.44005e-05	3.42193e-08	5.87613e-14	11	7	5	180028505	180076624	FLT4	ONC2_190_VEGFR-3	Yes	Primary,Trans,3,rs10935473,98416900,0.472,2.26e-38,5
52	9	Unweighted	11	136215058	136215141	RPL7A	Trans-Flank	4.1746e-14	5.89883e-12	0.0404919	1.905e-14	0.0402326	4.75889e-12	6.02556e-12	1.905e-14	207	337	17	62079953	62097994	ICAM2	CVD3_188_ICAM-2	Yes	Primary,Trans,9,9:136138765,136138765,0.151,3.83e-44,17
78	6	Commonrare	11	31698578	31698820	CLIC1	Trans-Flank	0.0173401	1.99354e-17	1.29064e-16	0.00918464	3.67266e-08	0.0112286	1.93233e-06	1.99354e-17	203	200	4	3508102	3534286	LRPAP1	NEU_127_Alpha-2-MRAP	Yes - Rare	Primary,Trans,6,rs113617295,30719481,0.010,2.23e-12,4
153	19	MAF weight - B(1,25)	11	43910616	43910711	TEX101	Trans-Flank	4.43618e-10	7.55778e-17	3.80374e-11	9.66966e-10	4.05254e-18	1.6654e-06	3.23705e-11	4.05254e-18	67	86	8	22941867	22974950	TNFRSF10C	CVD3_134_TNFRSF10C	Yes	Primary,Trans,19,rs4760,44153100,0.139,6.49e-90,8
132	9	Unweighted	11	136218727	136218877	SURF1	Trans-Flank	1.92731e-17	1.1843e-17	0.00507778	2.46471e-18	0.0194402	6.02809e-17	6.45327e-16	2.46471e-18	213	338	1	169691781	169733846	SELE	CVD3_136_SELE	Yes	Primary,Trans,9,9:136141870,136141870,0.151,7.35e-68,1
27	9	Unweighted	11	136230299	136230391	SURF4	Trans-Flank	7.10364e-17	4.30968e-16	0.0127054	6.60983e-20	0.0136756	1.40416e-15	8.57496e-16	6.60983e-20	231	334	16	66400524	66438689	CDH5	CVD3_127_CDH5	Yes	Primary,Trans,9,rs77693339,136128558,0.096,2.9e-56,16
45	1	Commonrare	11	109607104	109607355	TAF13	Trans-Flank	3.86827e-09	4.20713e-23	0.000659469	7.01313e-11	0.00248418	6.30726e-11	1.96741e-12	4.20713e-23	79	90	17	42422453	42430470	GRN	CVD3_118_GRN	Yes	Primary,Trans,1,rs12740374,109817590,0.216,3.26e-42,17
18	3	Eigen/CADD-weighted	11	46654115	46654228	RP11-509I21.2	Trans-Flank	4.44305e-26	1.62211e-21	0.06521	2.95258e-25	0.00855923	3.06635e-11	7.321e-21	4.44305e-26	129	199	17	34430982	34433014	CCL4	INF_130_CCL4	Yes	Primary,Trans,3,rs113341849,46384204,0.234,3.16e-44,17
103	3	Commonrare	11	52870599	52870691	TMEM110	Trans-CDS	2.87463e-44	1.04238e-47	0.393233	7.1597e-42	0.453845	1.34307e-44	1.27004e-44	1.04238e-47	1	2	3	154741912	154901518	MME	NEU_143_NEP	Yes	Primary,Trans,3,rs35004449,52852897,0.369,2.54e-55,3
120	19	Commonrare	12	49141335	49141441	CA11	Trans-Flank	4.12601e-10	2.0065e-10	0.294018	2.90695e-09	0.699796	0.000119419	7.09527e-08	2.0065e-10	194	185	16	2762418	2770552	PRSS27	CVD2_121_PRSS27	Yes	Primary,Trans,19,rs679574,49206108,0.282,1.44e-14,16
45	1	Commonrare	12	110230455	110230571	GSTM1	Trans-Flank	3.94163e-05	1.05618e-10	0.000125469	4.84459e-05	0.00049591	3.02427e-05	1.65297e-05	1.05618e-10	137	123	17	42422453	42430470	GRN	CVD3_118_GRN	Yes	Primary,Trans,1,rs12740374,109817590,0.216,3.26e-42,17
50	3	Commonrare	12	98281197	98281326	CPOX	Trans-CDS	0.000137029	3.11091e-12	0.508396	1.36128e-09	1.80271e-06	1.77565e-10	1.8985e-10	3.11091e-12	4	5	17	62079953	62097994	ICAM2	CVD3_188_ICAM-2	Yes	Primary,Trans,3,rs11927405,98402969,0.471,1.64e-51,17
163	3	Rare only	12	52847396	52847546	ITIH4	Trans-Flank	0.214769	7.12322e-08	2.9801e-12	0.270142	4.30418e-06	0.0174234	0.0262379	2.9801e-12	108	107	7	49813256	49961546	VWC2	NEU_108_VWC2	Yes - Rare	Primary,Trans,3,rs139719930,52859916,0.019,3.01e-24,7
40	3	Commonrare	12	97983088	97984146	OR5H6	Trans-Flank	4.6222e-08	8.65552e-14	0.000463534	6.44965e-06	9.92314e-06	2.15262e-07	5.73114e-07	8.65552e-14	35	72	5	180028505	180076624	FLT4	ONC2_190_VEGFR-3	Yes	Primary,Trans,3,rs10935473,98416900,0.472,2.26e-38,5
52	9	Eigen/CADD-weighted	12	136243304	136243471	STKLD1	Trans-Flank	4.20961e-14	5.58584e-08	0.0197823	4.30436e-14	0.0466065	1.11395e-12	4.5645e-12	4.20961e-14	254	361	17	62079953	62097994	ICAM2	CVD3_188_ICAM-2	Yes	Primary,Trans,9,9:136138765,136138765,0.151,3.83e-44,17
27	9	Commonrare	12	136379717	136379947	TMEM8C	Trans-Flank	6.43944e-12	2.9513e-16	0.00476361	1.46475e-12	8.89301e-05	1.66915e-10	8.64786e-14	2.9513e-16	260	460	16	66400524	66438689	CDH5	CVD3_127_CDH5	Yes	Primary,Trans,9,rs77693339,136128558,0.096,2.9e-56,16
78	6	Commonrare	12	31630002	31630527	GPANK1	Trans-CDS	0.0914646	2.33683e-17	1.93158e-14	0.00468089	9.00026e-08	0.00497265	7.4047e-09	2.33683e-17	2	3	4	3508102	3534286	LRPAP1	NEU_127_Alpha-2-MRAP	Yes - Rare	Primary,Trans,6,rs113617295,30719481,0.010,2.23e-12,4
153	19	Commonrare	12	43965462	43966039	LYPD3	Trans-Flank	1.1336e-07	5.757e-18	2.72134e-13	4.89958e-09	3.27081e-12	1.38937e-08	7.02681e-12	5.757e-18	86	108	8	22941867	22974950	TNFRSF10C	CVD3_134_TNFRSF10C	Yes	Primary,Trans,19,rs4760,44153100,0.139,6.49e-90,8
132	9	MAF weight - B(1,5)	12	136337102	136337338	SLC2A6	Trans-Flank	1.00265e-12	8.92227e-15	1.99546e-07	4.23814e-12	0.00269999	2.55648e-18	4.0959e-15	2.55648e-18	261	398	1	169691781	169733846	SELE	CVD3_136_SELE	Yes	Primary,Trans,9,9:136141870,136141870,0.151,7.35e-68,1
45	1	Commonrare	12	109633454	109633544	TMEM167B	Trans-Flank	2.43665e-09	2.34899e-21	0.00159671	6.53707e-11	0.00294828	5.46691e-09	1.56791e-11	2.34899e-21	80	107	17	42422453	42430470	GRN	CVD3_118_GRN	Yes	Primary,Trans,1,rs12740374,109817590,0.216,3.26e-42,17
18	3	Eigen/CADD-weighted	12	46622599	46622724	AC104304.4	Trans-Flank	6.15084e-26	5.45281e-25	0.107191	1.21374e-25	0.0164991	2.47107e-09	5.45859e-21	6.15084e-26	91	153	17	34430982	34433014	CCL4	INF_130_CCL4	Yes	Primary,Trans,3,rs113341849,46384204,0.234,3.16e-44,17
103	3	Unweighted	12	52867405	52867486	TMEM110-MUSTN1	Trans-CDS	2.30721e-08	3.23079e-39	0.19199	2.10132e-40	0.00129058	9.57025e-14	1.84446e-33	2.10132e-40	2	2	3	154741912	154901518	MME	NEU_143_NEP	Yes	Primary,Trans,3,rs35004449,52852897,0.369,2.54e-55,3
52	9	Unweighted	13	136337102	136337338	SLC2A6	Trans-CDS	0.0594497	3.81861e-07	0.946592	3.60231e-10	0.776889	0.000399351	0.000548201	3.60231e-10	12	7	17	62079953	62097994	ICAM2	CVD3_188_ICAM-2	Yes	Primary,Trans,9,9:136138765,136138765,0.151,3.83e-44,17
45	1	MAF weight - B(1,5)	13	110009425	110009559	SYPL2	Trans-Flank	0.00326605	4.49878e-08	1.18289e-06	0.00268779	2.7958e-06	1.59268e-10	0.000194202	1.59268e-10	132	93	17	42422453	42430470	GRN	CVD3_118_GRN	Yes	Primary,Trans,1,rs12740374,109817590,0.216,3.26e-42,17
163	3	Rare only	13	53902705	53902929	ACTR8	Trans-Flank	0.14733	4.15394e-12	3.72628e-12	0.145974	3.03706e-07	0.000128854	0.00108911	3.72628e-12	109	115	7	49813256	49961546	VWC2	NEU_108_VWC2	Yes - Rare	Primary,Trans,3,rs139719930,52859916,0.019,3.01e-24,7
40	3	Commonrare	13	98001691	98002716	OR5H2	Trans-Flank	3.57566e-08	9.84555e-14	0.00045602	5.72754e-06	2.2841e-05	7.12083e-07	5.04433e-07	9.84555e-14	34	69	5	180028505	180076624	FLT4	ONC2_190_VEGFR-3	Yes	Primary,Trans,3,rs10935473,98416900,0.472,2.26e-38,5
52	9	MAF weight - B(1,5)	13	136080675	136080836	OBP2B	Trans-CDS	0.000284879	1.20527e-13	1	3.77922e-12	9.17255e-05	5.68428e-14	1.83058e-11	5.68428e-14	3	3	17	62079953	62097994	ICAM2	CVD3_188_ICAM-2	Yes	Primary,Trans,9,9:136138765,136138765,0.151,3.83e-44,17
27	9	Unweighted	13	136243304	136243471	STKLD1	Trans-Flank	4.6641e-14	9.55367e-12	0.00583468	1.02633e-15	0.0262533	5.99538e-09	5.98441e-12	1.02633e-15	254	361	16	66400524	66438689	CDH5	CVD3_127_CDH5	Yes	Primary,Trans,9,rs77693339,136128558,0.096,2.9e-56,16
153	19	MAF weight - B(1,25)	13	44222559	44223464	IRGC	Trans-Flank	1.15288e-07	1.5441e-14	4.94958e-08	4.3618e-06	5.01767e-17	4.75144e-13	1.31604e-10	5.01767e-17	156	158	8	22941867	22974950	TNFRSF10C	CVD3_134_TNFRSF10C	Yes	Primary,Trans,19,rs4760,44153100,0.139,6.49e-90,8
78	6	Rare only	13	31982582	31982727	C4B	Trans-Flank	0.253189	8.07671e-13	2.41852e-17	0.212131	1.85594e-05	0.0731068	3.02363e-05	2.41852e-17	126	113	4	3508102	3534286	LRPAP1	NEU_127_Alpha-2-MRAP	Yes - Rare	Primary,Trans,6,rs113617295,30719481,0.010,2.23e-12,4
132	9	Unweighted	13	136208314	136208584	MED22	Trans-Flank	1.81913e-17	3.50332e-18	0.0267102	2.74199e-18	0.0239057	5.02253e-17	5.02439e-16	2.74199e-18	217	348	1	169691781	169733846	SELE	CVD3_136_SELE	Yes	Primary,Trans,9,9:136141870,136141870,0.151,7.35e-68,1
45	1	Commonrare	13	109514011	109514234	WDR47	Trans-Flank	3.74636e-08	5.15807e-19	9.91563e-05	6.49825e-09	0.00716559	2.68233e-08	1.38459e-08	5.15807e-19	92	101	17	42422453	42430470	GRN	CVD3_118_GRN	Yes	Primary,Trans,1,rs12740374,109817590,0.216,3.26e-42,17
18	3	Eigen/CADD-weighted	13	46619419	46619534	TDGF1	Trans-Flank	9.21649e-26	1.23885e-24	0.146099	2.34887e-25	0.0183039	2.70805e-09	9.05303e-21	9.21649e-26	90	151	17	34430982	34433014	CCL4	INF_130_CCL4	Yes	Primary,Trans,3,rs113341849,46384204,0.234,3.16e-44,17
103	3	Unweighted	13	52867122	52867303	RP5-966M1.6	Trans-CDS	9.84789e-35	8.58175e-33	0.134096	1.06396e-35	0.00130348	1.21217e-07	1.75496e-28	1.06396e-35	2	2	3	154741912	154901518	MME	NEU_143_NEP	Yes	Primary,Trans,3,rs35004449,52852897,0.369,2.54e-55,3
45	1	Commonrare	14	110162850	110162940	AMPD2	Trans-Flank	5.18772e-05	2.77503e-10	5.53866e-05	0.000129878	0.00154272	6.63938e-06	1.68357e-05	2.77503e-10	131	88	17	42422453	42430470	GRN	CVD3_118_GRN	Yes	Primary,Trans,1,rs12740374,109817590,0.216,3.26e-42,17
163	3	Rare only	14	52811591	52811788	ITIH1	Trans-Flank	0.233954	4.61942e-07	1.13411e-10	0.272708	5.04958e-06	0.00812016	0.0345381	1.13411e-10	124	115	7	49813256	49961546	VWC2	NEU_108_VWC2	Yes - Rare	Primary,Trans,3,rs139719930,52859916,0.019,3.01e-24,7
163	3	Rare only	14	53880575	53880715	IL17RB	Trans-Flank	0.207965	2.6567e-11	4.95024e-12	0.220002	7.96435e-07	0.000876607	0.00378762	4.95024e-12	122	125	7	49813256	49961546	VWC2	NEU_108_VWC2	Yes - Rare	Primary,Trans,3,rs139719930,52859916,0.019,3.01e-24,7
40	3	Commonrare	14	98072657	98073703	OR5K4	Trans-CDS	2.47888e-08	4.76009e-12	0.227095	7.15273e-07	0.0783303	0.0116936	1.37667e-06	4.76009e-12	3	2	5	180028505	180076624	FLT4	ONC2_190_VEGFR-3	Yes	Primary,Trans,3,rs10935473,98416900,0.472,2.26e-38,5
45	1	Commonrare	14	110145935	110146206	GNAT2	Trans-Flank	1.60478e-06	3.49811e-12	4.87254e-05	5.85801e-06	0.00132312	2.00452e-06	1.11077e-06	3.49811e-12	131	96	17	42422453	42430470	GRN	CVD3_118_GRN	Yes	Primary,Trans,1,rs12740374,109817590,0.216,3.26e-42,17
52	9	Commonrare	14	136379717	136379947	TMEM8C	Trans-Flank	3.95099e-10	8.05165e-14	0.000274689	8.04499e-10	2.42287e-05	4.218e-11	3.08981e-12	8.05165e-14	260	460	17	62079953	62097994	ICAM2	CVD3_188_ICAM-2	Yes	Primary,Trans,9,9:136138765,136138765,0.151,3.83e-44,17
27	9	Commonrare	14	135906245	135906337	GTF3C5	Trans-Flank	4.749e-07	1.25624e-14	0.00911037	4.5045e-08	1.68569e-05	3.81608e-12	6.73461e-10	1.25624e-14	212	221	16	66400524	66438689	CDH5	CVD3_127_CDH5	Yes	Primary,Trans,9,rs77693339,136128558,0.096,2.9e-56,16
153	19	MAF weight - B(1,25)	14	44030603	44030818	ZNF575	Trans-Flank	1.38331e-11	3.72724e-16	7.84201e-05	1.57689e-11	7.85343e-17	2.32969e-13	8.39132e-16	7.85343e-17	120	127	8	22941867	22974950	TNFRSF10C	CVD3_134_TNFRSF10C	Yes	Primary,Trans,19,rs4760,44153100,0.139,6.49e-90,8
78	6	Rare only	14	31949844	31949989	C4A	Trans-Flank	0.147555	3.11026e-15	2.75016e-17	0.117742	3.99341e-07	0.0229922	5.1754e-07	2.75016e-17	134	108	4	3508102	3534286	LRPAP1	NEU_127_Alpha-2-MRAP	Yes - Rare	Primary,Trans,6,rs113617295,30719481,0.010,2.23e-12,4
132	9	Unweighted	14	136198664	136199224	SURF6	Trans-Flank	2.23976e-17	8.48367e-18	0.0163688	6.97707e-18	0.0248802	8.65296e-16	3.46659e-15	6.97707e-18	215	343	1	169691781	169733846	SELE	CVD3_136_SELE	Yes	Primary,Trans,9,9:136141870,136141870,0.151,7.35e-68,1
18	3	Eigen/CADD-weighted	14	46712433	46712594	ALS2CL	Trans-Flank	2.71819e-20	6.10715e-15	0.0199037	2.28203e-19	0.00638533	8.90785e-06	1.19749e-12	2.71819e-20	134	197	17	34430982	34433014	CCL4	INF_130_CCL4	Yes	Primary,Trans,3,rs113341849,46384204,0.234,3.16e-44,17
103	3	Commonrare	14	52582038	52582291	PBRM1	Trans-CDS	7.19607e-26	1.38183e-33	0.374597	6.64871e-26	0.000471963	3.31725e-18	1.25204e-28	1.38183e-33	6	7	3	154741912	154901518	MME	NEU_143_NEP	Yes	Primary,Trans,3,rs35004449,52852897,0.369,2.54e-55,3
52	9	Commonrare	15	135973933	135974189	RALGDS	Trans-Flank	8.62004e-05	3.293e-10	0.00188226	9.03024e-06	7.14086e-06	7.39424e-08	9.57298e-08	3.293e-10	274	291	17	62079953	62097994	ICAM2	CVD3_188_ICAM-2	Yes	Primary,Trans,9,9:136138765,136138765,0.151,3.83e-44,17
45	1	MAF weight - B(1,5)	15	110009425	110009559	SYPL2	Trans-CDS	0.0102003	2.52993e-07	0.529759	0.00459617	0.00188437	3.12369e-10	1.0756e-05	3.12369e-10	3	4	17	42422453	42430470	GRN	CVD3_118_GRN	Yes	Primary,Trans,1,rs12740374,109817590,0.216,3.26e-42,17
163	3	Rare only	15	48636520	48636665	UQCRC1	Trans-CDS	0.72784	6.49977e-07	1.24509e-10	0.0137379	3.78203e-05	0.00714371	8.34925e-05	1.24509e-10	7	1	7	49813256	49961546	VWC2	NEU_108_VWC2	Yes - Rare	Primary,Trans,3,rs139719930,52859916,0.019,3.01e-24,7
163	3	Rare only	15	52828779	52828952	ITIH3	Trans-Flank	0.230341	3.60625e-07	2.09072e-11	0.272483	2.54146e-06	0.0107888	0.031584	2.09072e-11	120	110	7	49813256	49961546	VWC2	NEU_108_VWC2	Yes - Rare	Primary,Trans,3,rs139719930,52859916,0.019,3.01e-24,7
52	9	MAF weight - B(1,5)	15	136337102	136337338	SLC2A6	Trans-Flank	3.02724e-11	5.34629e-08	0.000630767	5.87341e-11	0.0183924	4.43571e-12	1.73954e-11	4.43571e-12	261	398	17	62079953	62097994	ICAM2	CVD3_188_ICAM-2	Yes	Primary,Trans,9,9:136138765,136138765,0.151,3.83e-44,17
45	1	Commonrare	15	110210697	110210813	GSTM2	Trans-Flank	3.17454e-05	4.05908e-12	1.37689e-05	3.68725e-05	2.88302e-05	1.11706e-05	4.6641e-06	4.05908e-12	166	139	17	42422453	42430470	GRN	CVD3_118_GRN	Yes	Primary,Trans,1,rs12740374,109817590,0.216,3.26e-42,17
27	9	Commonrare	15	135937340	135937495	CEL	Trans-Flank	4.55758e-07	7.76344e-14	0.00978502	1.97867e-08	0.000363291	1.85695e-11	8.72953e-10	7.76344e-14	215	234	16	66400524	66438689	CDH5	CVD3_127_CDH5	Yes	Primary,Trans,9,rs77693339,136128558,0.096,2.9e-56,16
153	19	Commonrare	15	43979521	43979736	PHLDB3	Trans-Flank	2.75838e-10	9.56024e-17	3.1673e-07	2.7579e-10	2.72318e-15	7.44733e-12	3.33676e-14	9.56024e-17	104	125	8	22941867	22974950	TNFRSF10C	CVD3_134_TNFRSF10C	Yes	Primary,Trans,19,rs4760,44153100,0.139,6.49e-90,8
78	6	Commonrare	15	31606867	31607043	BAG6	Trans-CDS	0.0133868	3.32158e-17	2.65078e-15	0.0164282	1.86802e-12	0.00772209	3.14005e-07	3.32158e-17	7	8	4	3508102	3534286	LRPAP1	NEU_127_Alpha-2-MRAP	Yes - Rare	Primary,Trans,6,rs113617295,30719481,0.010,2.23e-12,4
132	9	Commonrare	15	136399822	136400079	ADAMTSL2	Trans-Flank	5.22405e-11	1.10926e-17	1.14993e-06	5.11395e-10	4.04087e-11	6.53212e-17	1.07438e-15	1.10926e-17	349	565	1	169691781	169733846	SELE	CVD3_136_SELE	Yes	Primary,Trans,9,9:136141870,136141870,0.151,7.35e-68,1
18	3	Commonrare	15	45867765	45867864	LZTFL1	Trans-Flank	4.70689e-14	6.05068e-18	0.0120006	9.35001e-17	0.0143616	2.81612e-07	1.37427e-14	6.05068e-18	113	122	17	34430982	34433014	CCL4	INF_130_CCL4	Yes	Primary,Trans,3,rs113341849,46384204,0.234,3.16e-44,17
103	3	Commonrare	15	52740021	52740338	SPCS1	Trans-Flank	5.3184e-26	2.0441e-33	0.00459106	5.15801e-26	0.00135004	5.52608e-26	3.75698e-28	2.0441e-33	101	68	3	154741912	154901518	MME	NEU_143_NEP	Yes	Primary,Trans,3,rs35004449,52852897,0.369,2.54e-55,3
163	3	Rare only	16	52233217	52233496	ALAS1	Trans-Flank	0.262679	1.66607e-05	2.54817e-10	0.405313	0.194595	0.207576	0.152558	2.54817e-10	142	117	7	49813256	49961546	VWC2	NEU_108_VWC2	Yes - Rare	Primary,Trans,3,rs139719930,52859916,0.019,3.01e-24,7
45	1	Commonrare	16	110198971	110199084	GSTM4	Trans-Flank	5.94451e-05	3.28375e-11	1.92741e-05	6.73169e-05	0.00070638	2.88148e-05	1.75135e-05	3.28375e-11	133	109	17	42422453	42430470	GRN	CVD3_118_GRN	Yes	Primary,Trans,1,rs12740374,109817590,0.216,3.26e-42,17
52	9	Commonrare	16	136028923	136029688	GBGT1	Trans-Flank	2.0866e-06	1.28014e-11	0.0059223	1.98434e-08	4.27063e-07	1.04979e-10	8.82699e-11	1.28014e-11	256	320	17	62079953	62097994	ICAM2	CVD3_188_ICAM-2	Yes	Primary,Trans,9,9:136138765,136138765,0.151,3.83e-44,17
45	1	MAF weight - B(1,5)	16	110036721	110036816	CYB561D1	Trans-Flank	0.00131716	9.75939e-11	4.16028e-06	0.000693534	3.79073e-06	5.66457e-12	2.39735e-05	5.66457e-12	134	89	17	42422453	42430470	GRN	CVD3_118_GRN	Yes	Primary,Trans,1,rs12740374,109817590,0.216,3.26e-42,17
27	9	Commonrare	16	136399822	136400079	ADAMTSL2	Trans-Flank	8.08282e-10	1.22969e-13	0.0211086	1.1752e-09	0.000110809	2.85467e-08	6.46436e-11	1.22969e-13	349	565	16	66400524	66438689	CDH5	CVD3_127_CDH5	Yes	Primary,Trans,9,rs77693339,136128558,0.096,2.9e-56,16
153	19	MAF weight - B(1,25)	16	44010961	44011094	ETHE1	Trans-Flank	4.16549e-11	4.42748e-16	2.44532e-05	4.12378e-11	3.74349e-16	2.77257e-12	2.76127e-15	3.74349e-16	121	133	8	22941867	22974950	TNFRSF10C	CVD3_134_TNFRSF10C	Yes	Primary,Trans,19,rs4760,44153100,0.139,6.49e-90,8
132	9	MAF weight - B(1,5)	16	136379717	136379947	TMEM8C	Trans-CDS	1.27922e-16	1.16383e-11	0.776528	4.11102e-05	0.000164503	6.50009e-17	4.68647e-11	6.50009e-17	2	3	1	169691781	169733846	SELE	CVD3_136_SELE	Yes	Primary,Trans,9,9:136141870,136141870,0.151,7.35e-68,1
78	6	Rare only	16	31805065	31805252	C6orf48	Trans-Flank	0.0393629	8.28191e-16	3.84553e-17	0.0450842	3.08127e-06	0.0204261	9.42548e-06	3.84553e-17	142	142	4	3508102	3534286	LRPAP1	NEU_127_Alpha-2-MRAP	Yes - Rare	Primary,Trans,6,rs113617295,30719481,0.010,2.23e-12,4
18	3	Commonrare	16	46539512	46539747	RTP3	Trans-CDS	1.68745e-16	1.52064e-17	1	2.53121e-16	1	4.3648e-05	8.28669e-13	1.52064e-17	2	1	17	34430982	34433014	CCL4	INF_130_CCL4	Yes	Primary,Trans,3,rs113341849,46384204,0.234,3.16e-44,17
103	3	Commonrare	16	52728820	52729091	GLT8D1	Trans-Flank	5.5764e-26	1.13273e-32	0.00919913	5.69515e-26	0.002196	6.13545e-27	2.63896e-28	1.13273e-32	98	67	3	154741912	154901518	MME	NEU_143_NEP	Yes	Primary,Trans,3,rs35004449,52852897,0.369,2.54e-55,3
52	9	Eigen/CADD-weighted	17	136287523	136287708	ADAMTS13	Trans-Flank	1.60619e-11	3.64708e-08	0.000787959	1.15161e-10	0.0275764	7.15632e-11	2.56914e-10	1.60619e-11	322	466	17	62079953	62097994	ICAM2	CVD3_188_ICAM-2	Yes	Primary,Trans,9,9:136138765,136138765,0.151,3.83e-44,17
45	1	Commonrare	17	110085604	110087040	GPR61	Trans-Flank	0.000249348	6.60581e-12	6.69096e-06	0.000173957	0.000172506	9.27855e-08	4.39882e-06	6.60581e-12	158	118	17	42422453	42430470	GRN	CVD3_118_GRN	Yes	Primary,Trans,1,rs12740374,109817590,0.216,3.26e-42,17
27	9	Unweighted	17	136080675	136080836	OBP2B	Trans-CDS	0.000793257	1.51061e-11	0.699611	2.49288e-13	0.127345	1.18965e-07	4.40882e-08	2.49288e-13	3	3	16	66400524	66438689	CDH5	CVD3_127_CDH5	Yes	Primary,Trans,9,rs77693339,136128558,0.096,2.9e-56,16
153	19	MAF weight - B(0.5,0.5)	17	44116233	44118461	SRRM5	Trans-CDS	5.17822e-15	2.01946e-11	0.313731	2.57484e-15	0.0236494	1.29882e-07	2.02928e-15	2.02928e-15	4	6	8	22941867	22974950	TNFRSF10C	CVD3_134_TNFRSF10C	Yes	Primary,Trans,19,rs4760,44153100,0.139,6.49e-90,8
132	9	MAF weight - B(1,5)	17	136325148	136325349	CACFD1	Trans-Flank	2.40465e-12	4.40128e-14	1.21954e-07	1.33408e-11	0.00417101	6.92337e-17	6.53248e-14	6.92337e-17	285	418	1	169691781	169733846	SELE	CVD3_136_SELE	Yes	Primary,Trans,9,9:136141870,136141870,0.151,7.35e-68,1
18	3	Eigen/CADD-weighted	17	46742937	46743110	TMIE	Trans-Flank	6.03974e-17	8.27136e-13	0.0200974	5.03537e-16	0.00252235	3.75339e-05	7.73389e-11	6.03974e-17	124	165	17	34430982	34433014	CCL4	INF_130_CCL4	Yes	Primary,Trans,3,rs113341849,46384204,0.234,3.16e-44,17
78	6	Rare only	17	27114867	27115334	HIST1H2AH	Trans-Flank	0.126264	2.35454e-11	3.8623e-17	0.0895236	4.8824e-08	0.0298677	2.6486e-05	3.8623e-17	154	100	4	3508102	3534286	LRPAP1	NEU_127_Alpha-2-MRAP	Yes - Rare	Primary,Trans,6,rs113617295,30719481,0.010,2.23e-12,4
103	3	Commonrare	17	52745752	52745925	NEK4	Trans-CDS	1.76843e-25	1.44874e-32	0.00446717	1.28457e-25	0.000363745	2.89915e-10	2.44324e-28	1.44874e-32	5	6	3	154741912	154901518	MME	NEU_143_NEP	Yes	Primary,Trans,3,rs35004449,52852897,0.369,2.54e-55,3
27	9	Commonrare	18	134001051	134001176	NUP214	Trans-Flank	0.00127874	1.22232e-10	3.04189e-07	0.00562184	0.00243291	0.00343704	0.00177623	1.22232e-10	211	215	16	66400524	66438689	CDH5	CVD3_127_CDH5	Yes	Primary,Trans,9,rs77693339,136128558,0.096,2.9e-56,16
52	9	Commonrare	18	136444103	136444591	FAM163B	Trans-Flank	3.56803e-07	1.78288e-11	0.000995221	3.69383e-07	6.42381e-06	2.228e-06	2.74337e-09	1.78288e-11	278	507	17	62079953	62097994	ICAM2	CVD3_188_ICAM-2	Yes	Primary,Trans,9,9:136138765,136138765,0.151,3.83e-44,17
45	1	MAF weight - B(1,5)	18	109856624	109856719	SORT1	Trans-CDS	0.000850996	1.05841e-07	0.316052	9.47015e-05	0.0207012	8.05448e-12	1.61763e-06	8.05448e-12	6	6	17	42422453	42430470	GRN	CVD3_118_GRN	Yes	Primary,Trans,1,rs12740374,109817590,0.216,3.26e-42,17
27	9	Unweighted	18	136337102	136337338	SLC2A6	Trans-Flank	5.41727e-13	6.30233e-12	0.00278277	3.48982e-13	0.0115637	5.44644e-08	6.47019e-12	3.48982e-13	261	398	16	66400524	66438689	CDH5	CVD3_127_CDH5	Yes	Primary,Trans,9,rs77693339,136128558,0.096,2.9e-56,16
153	19	Commonrare	18	45175163	45175298	CEACAM19	Trans-Flank	0.0188353	8.2567e-15	2.20679e-07	0.00639142	4.29989e-11	4.46652e-06	9.33116e-08	8.2567e-15	197	136	8	22941867	22974950	TNFRSF10C	CVD3_134_TNFRSF10C	Yes	Primary,Trans,19,rs4760,44153100,0.139,6.49e-90,8
132	9	MAF weight - B(1,5)	18	136287523	136287708	ADAMTS13	Trans-Flank	2.61037e-12	8.69594e-14	1.05769e-07	4.21319e-11	0.00488172	2.10547e-16	3.56398e-13	2.10547e-16	322	466	1	169691781	169733846	SELE	CVD3_136_SELE	Yes	Primary,Trans,9,9:136141870,136141870,0.151,7.35e-68,1
18	3	Eigen/CADD-weighted	18	46753695	46754012	PRSS50	Trans-Flank	1.24595e-16	1.80275e-12	0.0203582	1.16285e-15	0.00251681	5.46539e-05	2.00525e-10	1.24595e-16	123	160	17	34430982	34433014	CCL4	INF_130_CCL4	Yes	Primary,Trans,3,rs113341849,46384204,0.234,3.16e-44,17
78	6	Rare only	18	27114156	27114617	HIST1H2BK	Trans-Flank	0.126264	2.35454e-11	3.8623e-17	0.0895236	4.8824e-08	0.0298677	2.6486e-05	3.8623e-17	154	100	4	3508102	3534286	LRPAP1	NEU_127_Alpha-2-MRAP	Yes - Rare	Primary,Trans,6,rs113617295,30719481,0.010,2.23e-12,4
103	3	Commonrare	18	52720068	52720161	GNL3	Trans-Flank	4.90625e-26	5.56762e-32	0.0195314	5.16214e-26	0.00523935	2.25882e-26	2.30394e-28	5.56762e-32	87	60	3	154741912	154901518	MME	NEU_143_NEP	Yes	Primary,Trans,3,rs35004449,52852897,0.369,2.54e-55,3
18	3	Commonrare	19	46560463	46560593	LRRC2	Trans-CDS	2.69742e-07	1.96143e-10	0.788174	2.93245e-07	0.344332	0.000154501	5.63757e-07	1.96143e-10	5	5	17	34430982	34433014	CCL4	INF_130_CCL4	Yes	Primary,Trans,3,rs113341849,46384204,0.234,3.16e-44,17
27	9	Commonrare	19	134136168	134136777	FAM78A	Trans-Flank	0.000473365	1.27175e-10	1.11378e-07	0.00170081	0.00401552	0.000491193	0.000542431	1.27175e-10	155	142	16	66400524	66438689	CDH5	CVD3_127_CDH5	Yes	Primary,Trans,9,rs77693339,136128558,0.096,2.9e-56,16
27	9	Commonrare	19	136444103	136444591	FAM163B	Trans-Flank	4.15466e-07	4.91198e-11	0.0862977	5.5997e-07	0.000283524	1.93892e-07	6.23058e-09	4.91198e-11	278	507	16	66400524	66438689	CDH5	CVD3_127_CDH5	Yes	Primary,Trans,9,rs77693339,136128558,0.096,2.9e-56,16
52	9	Eigen/CADD-weighted	19	136272036	136272236	REXO4	Trans-Flank	1.81196e-11	3.57039e-08	0.00202915	1.39736e-10	0.0381993	5.43332e-10	5.12948e-08	1.81196e-11	269	346	17	62079953	62097994	ICAM2	CVD3_188_ICAM-2	Yes	Primary,Trans,9,9:136138765,136138765,0.151,3.83e-44,17
45	1	Commonrare	19	110091302	110091500	GNAI3	Trans-Flank	0.000266592	9.28994e-12	6.68359e-06	0.000212136	0.000180106	1.03812e-09	5.18248e-06	9.28994e-12	168	129	17	42422453	42430470	GRN	CVD3_118_GRN	Yes	Primary,Trans,1,rs12740374,109817590,0.216,3.26e-42,17
27	9	Commonrare	19	135139585	135140412	SETX	Trans-Flank	0.000415883	4.05032e-13	0.000250926	0.00132589	0.00072115	1.57444e-05	0.000136114	4.05032e-13	182	171	16	66400524	66438689	CDH5	CVD3_127_CDH5	Yes	Primary,Trans,9,rs77693339,136128558,0.096,2.9e-56,16
153	19	Commonrare	19	45147356	45147515	PVR	Trans-Flank	0.00665791	1.03852e-14	2.34204e-07	0.00257925	1.1918e-11	2.67235e-06	1.63142e-07	1.03852e-14	193	143	8	22941867	22974950	TNFRSF10C	CVD3_134_TNFRSF10C	Yes	Primary,Trans,19,rs4760,44153100,0.139,6.49e-90,8
132	9	Eigen/CADD-weighted	19	136130948	136131097	ABO	Trans-CDS	4.60843e-16	3.52828e-07	0.566033	1.34584e-07	0.223525	3.38066e-05	8.69437e-07	4.60843e-16	10	25	1	169691781	169733846	SELE	CVD3_136_SELE	Yes	Primary,Trans,9,9:136141870,136141870,0.151,7.35e-68,1
18	3	Eigen/CADD-weighted	19	46761448	46761533	PRSS46	Trans-Flank	1.25428e-16	1.78867e-12	0.023292	1.12673e-15	0.00243544	5.23723e-05	1.96214e-10	1.25428e-16	133	163	17	34430982	34433014	CCL4	INF_130_CCL4	Yes	Primary,Trans,3,rs113341849,46384204,0.234,3.16e-44,17
78	6	Rare only	19	31937613	31937841	DXO	Trans-Flank	0.139484	1.92112e-13	4.0344e-17	0.102913	1.34469e-05	0.0495316	2.826e-05	4.0344e-17	108	101	4	3508102	3534286	LRPAP1	NEU_127_Alpha-2-MRAP	Yes - Rare	Primary,Trans,6,rs113617295,30719481,0.010,2.23e-12,4
103	3	Commonrare	19	52811591	52811788	ITIH1	Trans-CDS	3.19231e-21	9.66114e-31	0.000711358	3.18136e-23	0.000104861	3.74009e-07	5.60652e-25	9.66114e-31	9	11	3	154741912	154901518	MME	NEU_143_NEP	Yes	Primary,Trans,3,rs35004449,52852897,0.369,2.54e-55,3
27	9	Commonrare	20	131103001	131103157	SLC27A4	Trans-CDS	0.000274814	1.80753e-10	1.6031e-07	0.00710667	6.01411e-05	0.00177573	0.000268676	1.80753e-10	3	6	16	66400524	66438689	CDH5	CVD3_127_CDH5	Yes	Primary,Trans,9,rs77693339,136128558,0.096,2.9e-56,16
52	9	Eigen/CADD-weighted	20	136130948	136131097	ABO	Trans-CDS	8.99219e-11	1.0798e-05	0.59948	9.34127e-06	0.0358693	2.84934e-07	1.29027e-06	8.99219e-11	10	25	17	62079953	62097994	ICAM2	CVD3_188_ICAM-2	Yes	Primary,Trans,9,9:136138765,136138765,0.151,3.83e-44,17
103	3	Commonrare	20	50644997	50645613	CISH	Trans-Flank	7.231e-08	8.70974e-11	7.56638e-05	4.32546e-08	0.0255751	5.31691e-08	8.60158e-08	8.70974e-11	140	101	3	154741912	154901518	MME	NEU_143_NEP	Yes	Primary,Trans,3,rs35004449,52852897,0.369,2.54e-55,3
52	9	MAF weight - B(1,5)	20	136379717	136379947	TMEM8C	Trans-CDS	5.24602e-11	3.52007e-10	0.0103519	0.00043303	0.000418134	2.0926e-11	6.47696e-08	2.0926e-11	2	3	17	62079953	62097994	ICAM2	CVD3_188_ICAM-2	Yes	Primary,Trans,9,9:136138765,136138765,0.151,3.83e-44,17
45	1	Rare only	20	110655116	110655721	UBL4B	Trans-Flank	0.0261304	1.27255e-10	1.09311e-11	0.00867882	6.87423e-07	0.00276423	0.00097361	1.09311e-11	139	125	17	42422453	42430470	GRN	CVD3_118_GRN	Yes	Primary,Trans,1,rs12740374,109817590,0.216,3.26e-42,17
27	9	Unweighted	20	136287523	136287708	ADAMTS13	Trans-Flank	1.20725e-12	1.3084e-11	0.00178491	4.11681e-13	0.0220845	3.29013e-07	8.90122e-11	4.11681e-13	322	466	16	66400524	66438689	CDH5	CVD3_127_CDH5	Yes	Primary,Trans,9,rs77693339,136128558,0.096,2.9e-56,16
153	19	Eigen/CADD-weighted	20	45754806	45754937	MARK4	Trans-CDS	2.54514e-14	1.47944e-08	0.0032721	0.0759529	3.16698e-13	2.85941e-14	4.83481e-08	2.54514e-14	6	3	8	22941867	22974950	TNFRSF10C	CVD3_134_TNFRSF10C	Yes	Primary,Trans,19,rs4760,44153100,0.139,6.49e-90,8
18	3	Eigen/CADD-weighted	20	46783799	46784113	PRSS45	Trans-Flank	1.09327e-15	1.29723e-11	0.0289966	1.77804e-14	0.00419588	8.56632e-05	4.59871e-08	1.09327e-15	133	151	17	34430982	34433014	CCL4	INF_130_CCL4	Yes	Primary,Trans,3,rs113341849,46384204,0.234,3.16e-44,17
132	9	Commonrare	20	135545945	135546382	GTF3C4	Trans-Flank	0.000432283	5.62585e-16	9.03526e-08	0.000917703	8.50477e-11	1.20989e-06	7.41413e-06	5.62585e-16	133	122	1	169691781	169733846	SELE	CVD3_136_SELE	Yes	Primary,Trans,9,9:136141870,136141870,0.151,7.35e-68,1
78	6	Rare only	20	31939733	31940033	STK19	Trans-Flank	0.184152	5.84123e-13	4.10394e-17	0.145965	2.74652e-05	0.0523517	2.80135e-05	4.10394e-17	111	98	4	3508102	3534286	LRPAP1	NEU_127_Alpha-2-MRAP	Yes - Rare	Primary,Trans,6,rs113617295,30719481,0.010,2.23e-12,4
103	3	Commonrare	20	52582038	52582291	PBRM1	Trans-Flank	1.23959e-25	1.26432e-30	0.013971	3.38937e-26	0.000506561	1.77068e-08	1.34754e-29	1.26432e-30	236	170	3	154741912	154901518	MME	NEU_143_NEP	Yes	Primary,Trans,3,rs35004449,52852897,0.369,2.54e-55,3
27	9	Commonrare	21	134165344	134165875	PLPP7	Trans-Flank	0.000424203	2.30733e-10	3.9065e-06	0.00139886	0.00169935	0.000142935	0.000295931	2.30733e-10	172	151	16	66400524	66438689	CDH5	CVD3_127_CDH5	Yes	Primary,Trans,9,rs77693339,136128558,0.096,2.9e-56,16
27	9	Commonrare	21	134735884	134736099	MED27	Trans-Flank	0.000281859	1.90961e-10	0.000181193	0.000216089	0.00107911	5.0175e-05	6.35237e-05	1.90961e-10	289	281	16	66400524	66438689	CDH5	CVD3_127_CDH5	Yes	Primary,Trans,9,rs77693339,136128558,0.096,2.9e-56,16
103	3	Commonrare	21	50654956	50655255	MAPKAPK3	Trans-Flank	9.01742e-08	9.51914e-11	4.75035e-05	4.74646e-08	0.0129806	1.09036e-07	7.67525e-08	9.51914e-11	148	106	3	154741912	154901518	MME	NEU_143_NEP	Yes	Primary,Trans,3,rs35004449,52852897,0.369,2.54e-55,3
52	9	MAF weight - B(1,5)	21	136325148	136325349	CACFD1	Trans-Flank	4.52029e-11	5.89717e-08	0.000529747	9.74937e-11	0.0252916	3.8378e-11	1.11692e-10	3.8378e-11	285	418	17	62079953	62097994	ICAM2	CVD3_188_ICAM-2	Yes	Primary,Trans,9,9:136138765,136138765,0.151,3.83e-44,17
45	1	MAF weight - B(1,5)	21	110050012	110051574	AMIGO1	Trans-Flank	0.000981769	5.63464e-11	6.00783e-06	0.000480239	9.25188e-06	1.34591e-11	1.62735e-05	1.34591e-11	131	87	17	42422453	42430470	GRN	CVD3_118_GRN	Yes	Primary,Trans,1,rs12740374,109817590,0.216,3.26e-42,17
27	9	Unweighted	21	136325148	136325349	CACFD1	Trans-Flank	6.44235e-13	1.29986e-11	0.00267747	4.55539e-13	0.0162949	1.20238e-07	3.19481e-11	4.55539e-13	285	418	16	66400524	66438689	CDH5	CVD3_127_CDH5	Yes	Primary,Trans,9,rs77693339,136128558,0.096,2.9e-56,16
153	19	MAF weight - B(1,25)	21	44235707	44235866	SMG9	Trans-Flank	1.18143e-05	5.94307e-12	1.10662e-07	0.000378841	2.83423e-14	1.97796e-11	1.05063e-06	2.83423e-14	154	186	8	22941867	22974950	TNFRSF10C	CVD3_134_TNFRSF10C	Yes	Primary,Trans,19,rs4760,44153100,0.139,6.49e-90,8
18	3	Eigen/CADD-weighted	21	46244696	46245844	CCR1	Trans-Flank	1.76606e-15	1.02055e-10	0.0934512	6.81573e-15	0.125655	0.000472622	2.72932e-06	1.76606e-15	72	86	17	34430982	34433014	CCL4	INF_130_CCL4	Yes	Primary,Trans,3,rs113341849,46384204,0.234,3.16e-44,17
132	9	MAF weight - B(1,5)	21	136272036	136272236	REXO4	Trans-Flank	3.83254e-12	1.06941e-12	5.18597e-07	4.85352e-11	0.00547393	6.7857e-16	1.0175e-12	6.7857e-16	269	346	1	169691781	169733846	SELE	CVD3_136_SELE	Yes	Primary,Trans,9,9:136141870,136141870,0.151,7.35e-68,1
78	6	Rare only	21	31765493	31765699	LSM2	Trans-Flank	0.0303288	9.23094e-16	4.23945e-17	0.0282121	1.44532e-06	0.0177341	7.56736e-06	4.23945e-17	170	171	4	3508102	3534286	LRPAP1	NEU_127_Alpha-2-MRAP	Yes - Rare	Primary,Trans,6,rs113617295,30719481,0.010,2.23e-12,4
103	3	Commonrare	21	52828779	52828952	ITIH3	Trans-CDS	4.81646e-06	1.80281e-30	0.00119148	4.32673e-25	0.00107	4.24446e-07	5.67162e-22	1.80281e-30	14	4	3	154741912	154901518	MME	NEU_143_NEP	Yes	Primary,Trans,3,rs35004449,52852897,0.369,2.54e-55,3
27	9	Commonrare	22	135042178	135042471	NTNG2	Trans-Flank	0.00126848	2.56518e-11	0.000536736	0.00341092	0.000779875	3.71555e-05	0.000426612	2.56518e-11	199	173	16	66400524	66438689	CDH5	CVD3_127_CDH5	Yes	Primary,Trans,9,rs77693339,136128558,0.096,2.9e-56,16
45	1	Commonrare	22	110254894	110255010	GSTM5	Trans-Flank	0.000112138	1.68086e-11	1.41611e-05	0.000145825	1.22136e-05	2.94299e-05	8.12316e-06	1.68086e-11	143	125	17	42422453	42430470	GRN	CVD3_118_GRN	Yes	Primary,Trans,1,rs12740374,109817590,0.216,3.26e-42,17
27	9	Commonrare	22	136198664	136199224	SURF6	Trans-CDS	9.06171e-08	3.23617e-12	0.891922	6.92634e-08	0.689589	0.000168465	2.59947e-07	3.23617e-12	4	2	16	66400524	66438689	CDH5	CVD3_127_CDH5	Yes	Primary,Trans,9,rs77693339,136128558,0.096,2.9e-56,16
153	19	Eigen/CADD-weighted	22	45252007	45252343	BCL3	Trans-CDS	7.48028e-14	1.68059e-11	0.00104029	1.49838e-05	5.51569e-10	5.55134e-06	3.26069e-06	7.48028e-14	9	3	8	22941867	22974950	TNFRSF10C	CVD3_134_TNFRSF10C	Yes	Primary,Trans,19,rs4760,44153100,0.139,6.49e-90,8
18	3	Commonrare	22	45936385	45936486	CCR9	Trans-Flank	1.0526e-12	2.60424e-15	0.0228203	8.2573e-15	0.0185679	2.58509e-06	6.63866e-13	2.60424e-15	90	99	17	34430982	34433014	CCL4	INF_130_CCL4	Yes	Primary,Trans,3,rs113341849,46384204,0.234,3.16e-44,17
132	9	Commonrare	22	136028923	136029688	GBGT1	Trans-Flank	1.38829e-06	1.04338e-15	0.000788202	9.98364e-09	4.35859e-08	8.4235e-08	8.10056e-11	1.04338e-15	256	320	1	169691781	169733846	SELE	CVD3_136_SELE	Yes	Primary,Trans,9,9:136141870,136141870,0.151,7.35e-68,1
78	6	Rare only	22	31973904	31974015	AL645922.1	Trans-Flank	0.235044	1.06407e-13	4.44347e-17	0.203544	1.04823e-05	0.0630472	1.29902e-05	4.44347e-17	105	97	4	3508102	3534286	LRPAP1	NEU_127_Alpha-2-MRAP	Yes - Rare	Primary,Trans,6,rs113617295,30719481,0.010,2.23e-12,4
103	3	MAF weight - B(0.5,0.5)	22	52720068	52720161	GNL3	Trans-CDS	9.73179e-26	2.50237e-27	0.433367	6.11368e-26	0.0489068	1.96969e-07	1.16878e-29	1.16878e-29	4	7	3	154741912	154901518	MME	NEU_143_NEP	Yes	Primary,Trans,3,rs35004449,52852897,0.369,2.54e-55,3
153	19	Rare only	23	42817488	42817688	TMEM145	Trans-Flank	0.0422267	5.62666e-06	9.78891e-11	0.0261898	1.82991e-06	0.0263095	0.000677931	9.78891e-11	188	87	8	22941867	22974950	TNFRSF10C	CVD3_134_TNFRSF10C	Yes	Primary,Trans,19,rs4760,44153100,0.139,6.49e-90,8
18	3	Commonrare	23	52745752	52745925	NEK4	Trans-Flank	1.66538e-06	7.72203e-11	0.0017069	1.55547e-06	0.00313602	6.26976e-05	9.81748e-07	7.72203e-11	135	114	17	34430982	34433014	CCL4	INF_130_CCL4	Yes	Primary,Trans,3,rs113341849,46384204,0.234,3.16e-44,17
27	9	Commonrare	23	130928435	130928725	CIZ1	Trans-CDS	2.01723e-05	3.89423e-12	0.00403357	6.62852e-06	0.0211486	0.00016622	4.30259e-06	3.89423e-12	6	6	16	66400524	66438689	CDH5	CVD3_127_CDH5	Yes	Primary,Trans,9,rs77693339,136128558,0.096,2.9e-56,16
153	19	Commonrare	23	45204686	45204803	CEACAM16	Trans-Flank	0.0227665	2.05564e-13	4.19307e-06	0.00679278	1.15817e-07	4.7642e-06	8.52608e-08	2.05564e-13	205	136	8	22941867	22974950	TNFRSF10C	CVD3_134_TNFRSF10C	Yes	Primary,Trans,19,rs4760,44153100,0.139,6.49e-90,8
132	9	Commonrare	23	135973933	135974189	RALGDS	Trans-Flank	7.73364e-05	1.11305e-14	7.14255e-05	4.96856e-06	2.49467e-07	3.62546e-07	1.19711e-08	1.11305e-14	274	291	1	169691781	169733846	SELE	CVD3_136_SELE	Yes	Primary,Trans,9,9:136141870,136141870,0.151,7.35e-68,1
18	3	Commonrare	23	52847396	52847546	ITIH4	Trans-CDS	1.72198e-07	2.90479e-15	5.81585e-08	1.96342e-07	0.00160582	7.35647e-05	4.79319e-07	2.90479e-15	8	13	17	34430982	34433014	CCL4	INF_130_CCL4	Yes	Primary,Trans,3,rs113341849,46384204,0.234,3.16e-44,17
78	6	Commonrare	23	31708203	31708430	MSH5	Trans-Flank	0.0178266	4.70291e-17	1.25756e-16	0.0113667	1.57386e-07	0.0134975	3.7739e-06	4.70291e-17	194	187	4	3508102	3534286	LRPAP1	NEU_127_Alpha-2-MRAP	Yes - Rare	Primary,Trans,6,rs113617295,30719481,0.010,2.23e-12,4
103	3	Commonrare	23	53111756	53111884	RP11-894J14.5	Trans-Flank	4.34655e-21	7.29896e-29	0.000482647	4.44368e-27	4.77201e-06	1.44264e-13	2.52424e-26	7.29896e-29	120	131	3	154741912	154901518	MME	NEU_143_NEP	Yes	Primary,Trans,3,rs35004449,52852897,0.369,2.54e-55,3
153	19	MAF weight - B(1,5)	24	47258667	47258760	FKRP	Trans-Flank	1.55782e-06	2.79435e-06	0.0422668	6.06906e-07	0.00268509	1.77117e-10	1.32353e-09	1.77117e-10	169	131	8	22941867	22974950	TNFRSF10C	CVD3_134_TNFRSF10C	Yes	Primary,Trans,19,rs4760,44153100,0.139,6.49e-90,8
153	19	MAF weight - B(1,25)	24	43428919	43429016	PSG7	Trans-Flank	0.000264673	6.44909e-07	1.93929e-06	0.000255883	1.01208e-10	0.000764225	2.82806e-05	1.01208e-10	37	45	8	22941867	22974950	TNFRSF10C	CVD3_134_TNFRSF10C	Yes	Primary,Trans,19,rs4760,44153100,0.139,6.49e-90,8
27	9	Commonrare	24	135862025	135862205	GFI1B	Trans-Flank	0.000165816	4.1643e-12	0.142181	3.59548e-05	2.05158e-05	1.91685e-07	7.79041e-07	4.1643e-12	156	134	16	66400524	66438689	CDH5	CVD3_127_CDH5	Yes	Primary,Trans,9,rs77693339,136128558,0.096,2.9e-56,16
153	19	MAF weight - B(1,25)	24	44271654	44271899	KCNN4	Trans-Flank	0.0335376	7.23336e-08	8.24405e-08	0.0499509	9.04213e-13	0.000118238	0.00105472	9.04213e-13	140	181	8	22941867	22974950	TNFRSF10C	CVD3_134_TNFRSF10C	Yes	Primary,Trans,19,rs4760,44153100,0.139,6.49e-90,8
18	3	Unweighted	24	46305854	46305986	CCR3	Trans-Flank	2.05918e-13	9.25934e-13	0.0282592	5.28707e-14	0.067851	9.79984e-05	3.10135e-07	5.28707e-14	75	99	17	34430982	34433014	CCL4	INF_130_CCL4	Yes	Primary,Trans,3,rs113341849,46384204,0.234,3.16e-44,17
132	9	Commonrare	24	135937340	135937495	CEL	Trans-Flank	0.000701097	2.19442e-14	9.29595e-07	4.46185e-05	3.15693e-08	7.31555e-07	4.91546e-07	2.19442e-14	215	234	1	169691781	169733846	SELE	CVD3_136_SELE	Yes	Primary,Trans,9,9:136141870,136141870,0.151,7.35e-68,1
78	6	Rare only	24	31795687	31797693	HSPA1B	Trans-Flank	0.0357042	1.25245e-15	4.72927e-17	0.039678	2.37465e-06	0.0204595	9.44152e-06	4.72927e-17	161	155	4	3508102	3534286	LRPAP1	NEU_127_Alpha-2-MRAP	Yes - Rare	Primary,Trans,6,rs113617295,30719481,0.010,2.23e-12,4
103	3	Commonrare	24	52740021	52740338	SPCS1	Trans-CDS	0.193372	1.52615e-27	0.229735	4.94169e-26	0.193374	3.21519e-05	2.48384e-24	1.52615e-27	1	1	3	154741912	154901518	MME	NEU_143_NEP	Yes	Primary,Trans,3,rs35004449,52852897,0.369,2.54e-55,3
153	19	MAF weight - B(1,25)	25	41949034	41949288	ERICH4	Trans-Flank	0.0300319	7.24565e-06	1.22347e-06	0.014367	2.15242e-10	0.000431328	0.000477854	2.15242e-10	105	108	8	22941867	22974950	TNFRSF10C	CVD3_134_TNFRSF10C	Yes	Primary,Trans,19,rs4760,44153100,0.139,6.49e-90,8
153	19	Rare only	25	42801189	42801557	PAFAH1B3	Trans-Flank	0.00763533	1.97924e-06	2.0213e-10	0.00344037	3.50604e-06	0.00549956	0.000311041	2.0213e-10	178	92	8	22941867	22974950	TNFRSF10C	CVD3_134_TNFRSF10C	Yes	Primary,Trans,19,rs4760,44153100,0.139,6.49e-90,8
153	19	MAF weight - B(1,5)	25	47223818	47224068	STRN4	Trans-Flank	1.46116e-06	1.67055e-06	0.0337232	7.41139e-07	0.00108949	1.17801e-10	9.23856e-10	1.17801e-10	189	154	8	22941867	22974950	TNFRSF10C	CVD3_134_TNFRSF10C	Yes	Primary,Trans,19,rs4760,44153100,0.139,6.49e-90,8
27	9	Unweighted	25	136287523	136287708	ADAMTS13	Trans-CDS	5.38183e-06	3.88583e-10	0.152488	6.35287e-12	0.129011	0.00068047	3.64659e-11	6.35287e-12	13	19	16	66400524	66438689	CDH5	CVD3_127_CDH5	Yes	Primary,Trans,9,rs77693339,136128558,0.096,2.9e-56,16
153	19	Commonrare	25	45116915	45117120	IGSF23	Trans-Flank	0.00585421	1.01095e-12	1.10938e-06	0.00260638	2.19679e-10	6.06161e-06	8.36875e-07	1.01095e-12	148	121	8	22941867	22974950	TNFRSF10C	CVD3_134_TNFRSF10C	Yes	Primary,Trans,19,rs4760,44153100,0.139,6.49e-90,8
18	3	Commonrare	25	45799888	45799983	SLC6A20	Trans-Flank	2.99996e-09	5.49206e-14	0.0380994	5.7736e-09	0.00094175	1.3826e-10	1.13986e-10	5.49206e-14	95	120	17	34430982	34433014	CCL4	INF_130_CCL4	Yes	Primary,Trans,3,rs113341849,46384204,0.234,3.16e-44,17
132	9	Commonrare	25	135906245	135906337	GTF3C5	Trans-Flank	0.000922653	2.86142e-14	1.67965e-07	9.17286e-05	1.35309e-09	2.65861e-06	1.28688e-06	2.86142e-14	212	221	1	169691781	169733846	SELE	CVD3_136_SELE	Yes	Primary,Trans,9,9:136141870,136141870,0.151,7.35e-68,1
78	6	Commonrare	25	31644693	31644937	LY6G5C	Trans-Flank	0.0151544	5.13701e-17	2.46262e-16	0.0105479	1.21193e-10	0.009354	1.50582e-06	5.13701e-17	223	206	4	3508102	3534286	LRPAP1	NEU_127_Alpha-2-MRAP	Yes - Rare	Primary,Trans,6,rs113617295,30719481,0.010,2.23e-12,4
103	3	Commonrare	25	52529389	52529547	STAB1	Trans-CDS	7.59399e-19	1.8724e-27	3.95782e-05	2.41859e-19	1.07021e-06	1.17238e-07	9.83398e-24	1.8724e-27	26	17	3	154741912	154901518	MME	NEU_143_NEP	Yes	Primary,Trans,3,rs35004449,52852897,0.369,2.54e-55,3
153	19	Rare only	26	42905923	42906267	LIPE	Trans-Flank	0.01291	2.8476e-06	2.99121e-10	0.0267035	3.24214e-08	0.0234795	0.000349245	2.99121e-10	116	63	8	22941867	22974950	TNFRSF10C	CVD3_134_TNFRSF10C	Yes	Primary,Trans,19,rs4760,44153100,0.139,6.49e-90,8
153	19	MAF weight - B(1,5)	26	47278726	47279044	SLC1A5	Trans-Flank	9.84323e-07	2.33022e-06	0.043448	4.89641e-07	0.00272618	2.28357e-10	1.20435e-09	2.28357e-10	186	139	8	22941867	22974950	TNFRSF10C	CVD3_134_TNFRSF10C	Yes	Primary,Trans,19,rs4760,44153100,0.139,6.49e-90,8
153	19	MAF weight - B(1,25)	26	44301702	44302021	LYPD5	Trans-Flank	0.0343147	1.17951e-06	6.22222e-07	0.051452	1.19414e-10	0.000173661	0.00189861	1.19414e-10	123	174	8	22941867	22974950	TNFRSF10C	CVD3_134_TNFRSF10C	Yes	Primary,Trans,19,rs4760,44153100,0.139,6.49e-90,8
27	9	Unweighted	26	136272036	136272236	REXO4	Trans-Flank	1.38544e-11	2.89638e-08	0.00412645	8.43227e-12	0.0477084	1.34544e-05	7.05451e-08	8.43227e-12	269	346	16	66400524	66438689	CDH5	CVD3_127_CDH5	Yes	Primary,Trans,9,rs77693339,136128558,0.096,2.9e-56,16
153	19	MAF weight - B(1,25)	26	42502982	42503491	GRIK5	Trans-Flank	0.000279632	3.39581e-10	4.9448e-06	0.000188816	1.10827e-12	1.56333e-05	4.08248e-07	1.10827e-12	211	115	8	22941867	22974950	TNFRSF10C	CVD3_134_TNFRSF10C	Yes	Primary,Trans,19,rs4760,44153100,0.139,6.49e-90,8
18	3	Unweighted	26	45987933	45989042	CXCR6	Trans-Flank	1.53518e-11	1.60154e-11	0.0259724	6.9029e-13	0.0119028	3.23553e-05	9.65876e-10	6.9029e-13	84	92	17	34430982	34433014	CCL4	INF_130_CCL4	Yes	Primary,Trans,3,rs113341849,46384204,0.234,3.16e-44,17
132	9	Commonrare	26	135862025	135862205	GFI1B	Trans-Flank	3.79013e-05	5.4096e-14	2.57462e-08	2.13342e-05	4.57735e-07	1.98273e-05	1.34396e-07	5.4096e-14	156	134	1	169691781	169733846	SELE	CVD3_136_SELE	Yes	Primary,Trans,9,9:136141870,136141870,0.151,7.35e-68,1
78	6	Commonrare	26	31708203	31708430	MSH5	Trans-CDS	0.00172557	5.29618e-17	1.51696e-16	0.0266476	5.71327e-11	0.00238845	4.43791e-08	5.29618e-17	11	8	4	3508102	3534286	LRPAP1	NEU_127_Alpha-2-MRAP	Yes - Rare	Primary,Trans,6,rs113617295,30719481,0.010,2.23e-12,4
103	3	Commonrare	26	53125878	53126126	RFT1	Trans-Flank	1.85456e-20	1.47053e-26	0.000169302	1.52521e-23	4.12691e-06	4.15535e-14	1.83745e-23	1.47053e-26	126	164	3	154741912	154901518	MME	NEU_143_NEP	Yes	Primary,Trans,3,rs35004449,52852897,0.369,2.54e-55,3
153	19	Rare only	27	42932995	42933173	CXCL17	Trans-Flank	0.0234853	3.04893e-06	3.92143e-10	0.0351227	1.64211e-07	0.0329616	0.000578354	3.92143e-10	107	59	8	22941867	22974950	TNFRSF10C	CVD3_134_TNFRSF10C	Yes	Primary,Trans,19,rs4760,44153100,0.139,6.49e-90,8
153	19	Commonrare	27	36103656	36103834	HAUS5	Trans-Flank	0.00630963	3.20049e-10	2.93518e-05	0.0149613	4.06022e-07	0.000220327	0.000187788	3.20049e-10	113	134	8	22941867	22974950	TNFRSF10C	CVD3_134_TNFRSF10C	Yes	Primary,Trans,19,rs4760,44153100,0.139,6.49e-90,8
153	19	Rare only	27	49055469	49055620	SULT2B1	Trans-CDS	0.393581	2.04934e-07	3.05086e-10	0.276822	3.6303e-05	0.00503885	0.00445401	3.05086e-10	8	6	8	22941867	22974950	TNFRSF10C	CVD3_134_TNFRSF10C	Yes	Primary,Trans,19,rs4760,44153100,0.139,6.49e-90,8
153	19	MAF weight - B(1,25)	27	43406523	43406638	PSG6	Trans-Flank	0.000242564	3.94481e-06	6.02891e-05	0.000247049	2.43002e-10	0.00086782	3.01108e-05	2.43002e-10	30	44	8	22941867	22974950	TNFRSF10C	CVD3_134_TNFRSF10C	Yes	Primary,Trans,19,rs4760,44153100,0.139,6.49e-90,8
103	3	Rare only	27	48725665	48726246	IP6K2	Trans-Flank	0.147782	8.52216e-06	4.62597e-11	0.165761	9.2899e-08	0.106834	0.0196864	4.62597e-11	158	83	3	154741912	154901518	MME	NEU_143_NEP	Yes	Primary,Trans,3,rs35004449,52852897,0.369,2.54e-55,3
18	3	Commonrare	27	52847396	52847546	ITIH4	Trans-Flank	2.28821e-07	7.05453e-12	0.000422675	2.04921e-07	0.00790786	0.000573208	2.04408e-07	7.05453e-12	108	107	17	34430982	34433014	CCL4	INF_130_CCL4	Yes	Primary,Trans,3,rs113341849,46384204,0.234,3.16e-44,17
153	19	Rare only	27	42830355	42830622	MEGF8	Trans-Flank	0.0417034	2.65902e-06	1.79696e-12	0.0250373	4.4004e-06	0.0263982	0.000966083	1.79696e-12	195	93	8	22941867	22974950	TNFRSF10C	CVD3_134_TNFRSF10C	Yes	Primary,Trans,19,rs4760,44153100,0.139,6.49e-90,8
132	9	Commonrare	27	135285618	135285893	CFAP77	Trans-Flank	0.000655951	2.2459e-13	1.20113e-06	0.00226374	1.68669e-06	1.79178e-05	2.15016e-05	2.2459e-13	211	246	1	169691781	169733846	SELE	CVD3_136_SELE	Yes	Primary,Trans,9,9:136141870,136141870,0.151,7.35e-68,1
78	6	Rare only	27	31783493	31783648	HSPA1A	Trans-Flank	0.0339527	1.20693e-15	5.37494e-17	0.0342333	2.93228e-06	0.0224119	1.06281e-05	5.37494e-17	156	161	4	3508102	3534286	LRPAP1	NEU_127_Alpha-2-MRAP	Yes - Rare	Primary,Trans,6,rs113617295,30719481,0.010,2.23e-12,4
103	3	Unweighted	27	52489617	52489790	NISCH	Trans-Flank	1.12043e-23	1.34117e-18	0.000132036	8.83746e-26	0.000548965	1.01161e-05	2.83297e-17	8.83746e-26	258	183	3	154741912	154901518	MME	NEU_143_NEP	Yes	Primary,Trans,3,rs35004449,52852897,0.369,2.54e-55,3
153	19	MAF weight - B(1,5)	28	39904686	39904875	PLEKHG2	Trans-Flank	0.000690293	4.19193e-07	0.0253019	0.000356024	4.27102e-07	4.07667e-10	6.79444e-07	4.07667e-10	170	157	8	22941867	22974950	TNFRSF10C	CVD3_134_TNFRSF10C	Yes	Primary,Trans,19,rs4760,44153100,0.139,6.49e-90,8
153	19	Commonrare	28	45312341	45312503	BCAM	Trans-Flank	0.0188878	3.44193e-10	2.36239e-06	0.00331446	5.97828e-05	0.000745766	3.8767e-06	3.44193e-10	196	162	8	22941867	22974950	TNFRSF10C	CVD3_134_TNFRSF10C	Yes	Primary,Trans,19,rs4760,44153100,0.139,6.49e-90,8
103	3	Rare only	28	48601798	48601895	COL7A1	Trans-Flank	0.0336739	1.91621e-06	5.02015e-11	0.0744774	6.31435e-05	0.0374136	0.00481931	5.02015e-11	228	123	3	154741912	154901518	MME	NEU_143_NEP	Yes	Primary,Trans,3,rs35004449,52852897,0.369,2.54e-55,3
18	3	Commonrare	28	52828779	52828952	ITIH3	Trans-Flank	6.72758e-07	7.77898e-12	0.000459308	4.73716e-07	0.00245433	0.000162512	3.35996e-07	7.77898e-12	120	110	17	34430982	34433014	CCL4	INF_130_CCL4	Yes	Primary,Trans,3,rs113341849,46384204,0.234,3.16e-44,17
153	19	Commonrare	28	45252007	45252343	BCL3	Trans-Flank	0.0264859	3.74358e-12	3.68898e-06	0.0126837	1.42948e-06	4.14244e-05	3.98581e-07	3.74358e-12	221	140	8	22941867	22974950	TNFRSF10C	CVD3_134_TNFRSF10C	Yes	Primary,Trans,19,rs4760,44153100,0.139,6.49e-90,8
132	9	Commonrare	28	135470212	135470539	DDX31	Trans-Flank	0.0031618	4.2487e-13	7.10072e-07	0.0072367	3.02097e-07	3.51077e-06	2.07614e-05	4.2487e-13	180	210	1	169691781	169733846	SELE	CVD3_136_SELE	Yes	Primary,Trans,9,9:136141870,136141870,0.151,7.35e-68,1
78	6	Rare only	28	31730791	31730985	SAPCD1	Trans-Flank	0.0247337	3.20333e-16	5.56954e-17	0.0178405	2.32108e-06	0.0214285	1.01791e-05	5.56954e-17	166	165	4	3508102	3534286	LRPAP1	NEU_127_Alpha-2-MRAP	Yes - Rare	Primary,Trans,6,rs113617295,30719481,0.010,2.23e-12,4
103	3	Commonrare	28	52570731	52570829	SMIM4	Trans-Flank	1.14145e-23	1.16783e-25	0.00939794	1.75259e-25	0.000582774	7.30938e-07	6.34712e-25	1.16783e-25	193	138	3	154741912	154901518	MME	NEU_143_NEP	Yes	Primary,Trans,3,rs35004449,52852897,0.369,2.54e-55,3
153	19	Eigen/CADD-weighted	29	39798232	39799222	LRFN1	Trans-CDS	4.17845e-10	3.3438e-09	1.23052e-05	2.92551e-08	3.27382e-07	4.00073e-08	6.97064e-10	4.17845e-10	1	2	8	22941867	22974950	TNFRSF10C	CVD3_134_TNFRSF10C	Yes	Primary,Trans,19,rs4760,44153100,0.139,6.49e-90,8
18	3	Commonrare	29	56763257	56763690	ARHGEF3	Trans-Flank	0.000747189	2.17753e-11	1.53727e-10	0.000623008	1.62523e-05	0.000122524	2.59343e-05	2.17753e-11	205	309	17	34430982	34433014	CCL4	INF_130_CCL4	Yes	Primary,Trans,3,rs113341849,46384204,0.234,3.16e-44,17
153	19	Commonrare	29	45281148	45281581	CBLC	Trans-Flank	0.010779	1.97502e-11	5.86563e-06	0.00222052	5.16631e-06	4.18083e-05	5.15698e-07	1.97502e-11	213	169	8	22941867	22974950	TNFRSF10C	CVD3_134_TNFRSF10C	Yes	Primary,Trans,19,rs4760,44153100,0.139,6.49e-90,8
18	3	Unweighted	29	45963216	45963372	FYCO1	Trans-Flank	6.45582e-11	1.51844e-11	0.0107167	8.8893e-12	0.0163893	4.86167e-05	1.49044e-09	8.8893e-12	102	131	17	34430982	34433014	CCL4	INF_130_CCL4	Yes	Primary,Trans,3,rs113341849,46384204,0.234,3.16e-44,17
153	19	Rare only	29	42775895	42776408	CIC	Trans-Flank	0.00398565	1.99532e-07	8.00301e-12	0.000989683	3.36209e-06	0.00179874	0.000135213	8.00301e-12	185	92	8	22941867	22974950	TNFRSF10C	CVD3_134_TNFRSF10C	Yes	Primary,Trans,19,rs4760,44153100,0.139,6.49e-90,8
132	9	Commonrare	29	136444103	136444591	FAM163B	Trans-Flank	1.92049e-06	2.26307e-12	5.4203e-06	5.64513e-06	6.1809e-09	2.29899e-07	3.28172e-09	2.26307e-12	278	507	1	169691781	169733846	SELE	CVD3_136_SELE	Yes	Primary,Trans,9,9:136141870,136141870,0.151,7.35e-68,1
78	6	Rare only	29	31777783	31779789	HSPA1L	Trans-Flank	0.0311752	1.75821e-15	6.78707e-17	0.0292161	3.81092e-06	0.0213094	1.23456e-05	6.78707e-17	162	166	4	3508102	3534286	LRPAP1	NEU_127_Alpha-2-MRAP	Yes - Rare	Primary,Trans,6,rs113617295,30719481,0.010,2.23e-12,4
103	3	Unweighted	29	52529389	52529547	STAB1	Trans-Flank	1.71074e-23	7.22398e-23	0.00210247	1.63843e-25	0.000637806	1.69916e-06	1.40649e-21	1.63843e-25	214	149	3	154741912	154901518	MME	NEU_143_NEP	Yes	Primary,Trans,3,rs35004449,52852897,0.369,2.54e-55,3
153	19	MAF weight - B(1,25)	30	36041476	36041585	ATP4A	Trans-Flank	0.0118115	4.96748e-07	3.71472e-05	0.0155772	4.24639e-10	0.000494019	0.000167844	4.24639e-10	114	128	8	22941867	22974950	TNFRSF10C	CVD3_134_TNFRSF10C	Yes	Primary,Trans,19,rs4760,44153100,0.139,6.49e-90,8
153	19	MAF weight - B(1,25)	30	36077121	36077483	LLNLR-275H8.1	Trans-Flank	0.0176364	5.8647e-08	3.98417e-05	0.0216517	4.49876e-11	0.000399967	0.000150356	4.49876e-11	99	116	8	22941867	22974950	TNFRSF10C	CVD3_134_TNFRSF10C	Yes	Primary,Trans,19,rs4760,44153100,0.139,6.49e-90,8
153	19	Commonrare	30	45005770	45005871	CEACAM20	Trans-Flank	0.0148383	4.33604e-11	0.000119814	0.00168867	3.31708e-06	5.5812e-05	1.97261e-05	4.33604e-11	88	94	8	22941867	22974950	TNFRSF10C	CVD3_134_TNFRSF10C	Yes	Primary,Trans,19,rs4760,44153100,0.139,6.49e-90,8
153	19	Rare only	30	42813696	42814377	PRR19	Trans-Flank	0.043344	5.69287e-06	2.02763e-11	0.0267096	2.55188e-06	0.0273659	0.000958145	2.02763e-11	172	84	8	22941867	22974950	TNFRSF10C	CVD3_134_TNFRSF10C	Yes	Primary,Trans,19,rs4760,44153100,0.139,6.49e-90,8
18	3	Commonrare	30	52867405	52867486	TMEM110-MUSTN1	Trans-Flank	1.84141e-07	1.92224e-11	0.00233413	1.66735e-07	0.00488894	0.000465171	1.8121e-07	1.92224e-11	118	116	17	34430982	34433014	CCL4	INF_130_CCL4	Yes	Primary,Trans,3,rs113341849,46384204,0.234,3.16e-44,17
132	9	Commonrare	30	135458144	135458690	BARHL1	Trans-Flank	0.00541241	1.8994e-11	3.91137e-06	0.0136135	2.27905e-06	1.23938e-05	6.46544e-05	1.8994e-11	157	196	1	169691781	169733846	SELE	CVD3_136_SELE	Yes	Primary,Trans,9,9:136141870,136141870,0.151,7.35e-68,1
18	3	Commonrare	30	52811591	52811788	ITIH1	Trans-Flank	1.08107e-06	1.38379e-11	0.000616828	7.56794e-07	0.00120336	5.9576e-05	4.94467e-07	1.38379e-11	124	115	17	34430982	34433014	CCL4	INF_130_CCL4	Yes	Primary,Trans,3,rs113341849,46384204,0.234,3.16e-44,17
78	6	Rare only	30	31727181	31727329	MSH5-SAPCD1	Trans-Flank	0.0202097	2.28792e-16	8.66143e-17	0.0141079	6.80297e-07	0.0197591	1.01762e-05	8.66143e-17	173	174	4	3508102	3534286	LRPAP1	NEU_127_Alpha-2-MRAP	Yes - Rare	Primary,Trans,6,rs113617295,30719481,0.010,2.23e-12,4
103	3	Unweighted	30	52446855	52446976	PHF7	Trans-Flank	3.69686e-24	2.02898e-11	1.73186e-06	1.6538e-25	0.00056332	7.13746e-05	2.48534e-08	1.6538e-25	239	180	3	154741912	154901518	MME	NEU_143_NEP	Yes	Primary,Trans,3,rs35004449,52852897,0.369,2.54e-55,3
153	19	MAF weight - B(1,5)	31	39847493	39847769	SAMD4B	Trans-Flank	0.000577346	3.51253e-07	0.0771621	0.00020602	8.69587e-07	4.53735e-10	2.68455e-07	4.53735e-10	184	143	8	22941867	22974950	TNFRSF10C	CVD3_134_TNFRSF10C	Yes	Primary,Trans,19,rs4760,44153100,0.139,6.49e-90,8
153	19	Rare only	31	42891264	42891434	CNFN	Trans-Flank	0.0200925	4.86919e-06	3.67236e-11	0.0337891	4.97098e-07	0.032975	0.000802015	3.67236e-11	129	64	8	22941867	22974950	TNFRSF10C	CVD3_134_TNFRSF10C	Yes	Primary,Trans,19,rs4760,44153100,0.139,6.49e-90,8
18	3	Commonrare	31	52870599	52870691	TMEM110	Trans-Flank	1.7616e-07	1.87576e-11	0.00205476	1.59888e-07	0.00419897	0.000464133	1.66062e-07	1.87576e-11	116	114	17	34430982	34433014	CCL4	INF_130_CCL4	Yes	Primary,Trans,3,rs113341849,46384204,0.234,3.16e-44,17
18	3	Commonrare	31	52867122	52867303	RP5-966M1.6	Trans-Flank	1.87971e-07	1.82154e-11	0.00189772	1.79085e-07	0.00704914	0.000504952	2.05461e-07	1.82154e-11	101	106	17	34430982	34433014	CCL4	INF_130_CCL4	Yes	Primary,Trans,3,rs113341849,46384204,0.234,3.16e-44,17
18	3	Commonrare	31	43732444	43732571	ABHD5	Trans-CDS	0.00113513	1.61401e-11	0.290653	3.29381e-05	0.00885999	4.37828e-05	0.0177054	1.61401e-11	6	1	17	34430982	34433014	CCL4	INF_130_CCL4	Yes	Primary,Trans,3,rs113341849,46384204,0.234,3.16e-44,17
78	6	Rare only	31	31920037	31920215	NELFE	Trans-Flank	0.120012	8.89871e-13	1.29064e-16	0.109639	2.87809e-05	0.0461242	7.02046e-05	1.29064e-16	108	106	4	3508102	3534286	LRPAP1	NEU_127_Alpha-2-MRAP	Yes - Rare	Primary,Trans,6,rs113617295,30719481,0.010,2.23e-12,4
103	3	Unweighted	31	52558445	52558667	NT5DC2	Trans-Flank	1.62559e-23	3.55412e-25	0.00631323	1.92639e-25	0.000506716	4.32156e-07	4.94177e-24	1.92639e-25	186	140	3	154741912	154901518	MME	NEU_143_NEP	Yes	Primary,Trans,3,rs35004449,52852897,0.369,2.54e-55,3
153	19	MAF weight - B(1,5)	32	47177739	47178032	PRKD2	Trans-Flank	1.99324e-06	1.7491e-06	0.0295778	1.6841e-06	0.00104299	4.55599e-10	8.46571e-10	4.55599e-10	204	178	8	22941867	22974950	TNFRSF10C	CVD3_134_TNFRSF10C	Yes	Primary,Trans,19,rs4760,44153100,0.139,6.49e-90,8
103	3	Rare only	32	48658234	48658500	TMEM89	Trans-Flank	0.179921	7.68084e-06	4.1912e-11	0.194535	0.000169397	0.104175	0.0174064	4.1912e-11	205	114	3	154741912	154901518	MME	NEU_143_NEP	Yes	Primary,Trans,3,rs35004449,52852897,0.369,2.54e-55,3
18	3	Commonrare	32	52867299	52867486	MUSTN1	Trans-Flank	1.87971e-07	1.82154e-11	0.00189772	1.79085e-07	0.00704914	0.000504952	2.05461e-07	1.82154e-11	101	106	17	34430982	34433014	CCL4	INF_130_CCL4	Yes	Primary,Trans,3,rs113341849,46384204,0.234,3.16e-44,17
78	6	Rare only	32	27107047	27107439	HIST1H4I	Trans-Flank	0.144153	1.54681e-10	1.31602e-16	0.118227	7.57702e-08	0.0443733	8.68894e-05	1.31602e-16	155	102	4	3508102	3534286	LRPAP1	NEU_127_Alpha-2-MRAP	Yes - Rare	Primary,Trans,6,rs113617295,30719481,0.010,2.23e-12,4
103	3	Unweighted	32	52469578	52470129	SEMA3G	Trans-Flank	3.81536e-23	3.48362e-15	2.61706e-05	2.67311e-25	0.00041622	1.83794e-05	8.93577e-14	2.67311e-25	266	190	3	154741912	154901518	MME	NEU_143_NEP	Yes	Primary,Trans,3,rs35004449,52852897,0.369,2.54e-55,3
153	19	MAF weight - B(1,5)	33	39876514	39876899	PAF1	Trans-Flank	0.000621589	3.24148e-07	0.0517729	0.00024678	7.44236e-07	4.55891e-10	2.79699e-07	4.55891e-10	173	140	8	22941867	22974950	TNFRSF10C	CVD3_134_TNFRSF10C	Yes	Primary,Trans,19,rs4760,44153100,0.139,6.49e-90,8
78	6	Rare only	33	31733330	31733587	VWA7	Trans-Flank	0.0232513	6.96486e-15	1.56316e-16	0.0183992	1.36328e-05	0.0283023	3.69625e-05	1.56316e-16	166	171	4	3508102	3534286	LRPAP1	NEU_127_Alpha-2-MRAP	Yes - Rare	Primary,Trans,6,rs113617295,30719481,0.010,2.23e-12,4
103	3	Unweighted	33	52356418	52356831	DNAH1	Trans-Flank	3.72363e-24	4.24196e-11	1.73422e-05	2.79808e-25	0.00427275	7.95255e-05	3.05938e-09	2.79808e-25	276	232	3	154741912	154901518	MME	NEU_143_NEP	Yes	Primary,Trans,3,rs35004449,52852897,0.369,2.54e-55,3
78	6	Rare only	34	32006159	32006441	CYP21A2	Trans-Flank	0.229817	1.11267e-13	1.74027e-16	0.183991	4.81655e-06	0.0524209	8.628e-06	1.74027e-16	116	110	4	3508102	3534286	LRPAP1	NEU_127_Alpha-2-MRAP	Yes - Rare	Primary,Trans,6,rs113617295,30719481,0.010,2.23e-12,4
103	3	Unweighted	34	52485250	52485362	TNNC1	Trans-Flank	5.55278e-23	4.04479e-16	3.48948e-05	5.98397e-25	0.000599399	1.83408e-05	7.73209e-15	5.98397e-25	252	177	3	154741912	154901518	MME	NEU_143_NEP	Yes	Primary,Trans,3,rs35004449,52852897,0.369,2.54e-55,3
78	6	Rare only	35	31745330	31745479	VARS	Trans-Flank	0.0282403	2.78966e-14	1.98878e-16	0.0222181	2.58447e-05	0.0294285	4.51096e-05	1.98878e-16	171	179	4	3508102	3534286	LRPAP1	NEU_127_Alpha-2-MRAP	Yes - Rare	Primary,Trans,6,rs113617295,30719481,0.010,2.23e-12,4
103	3	Unweighted	35	52489617	52489790	NISCH	Trans-CDS	1.33937e-12	1.09737e-07	0.285006	9.18074e-25	0.00701869	0.000236939	3.46003e-08	9.18074e-25	16	16	3	154741912	154901518	MME	NEU_143_NEP	Yes	Primary,Trans,3,rs35004449,52852897,0.369,2.54e-55,3
78	6	Commonrare	36	31638687	31638825	LY6G5B	Trans-Flank	0.0149582	2.26555e-16	4.83193e-16	0.010689	6.63853e-11	0.00961911	1.36299e-06	2.26555e-16	225	213	4	3508102	3534286	LRPAP1	NEU_127_Alpha-2-MRAP	Yes - Rare	Primary,Trans,6,rs113617295,30719481,0.010,2.23e-12,4
103	3	Unweighted	36	52435648	52436217	BAP1	Trans-Flank	1.27361e-18	1.38255e-08	8.37486e-06	2.18056e-22	0.00115765	0.000146244	8.57318e-08	2.18056e-22	219	174	3	154741912	154901518	MME	NEU_143_NEP	Yes	Primary,Trans,3,rs35004449,52852897,0.369,2.54e-55,3
78	6	Commonrare	37	31633184	31633310	CSNK2B	Trans-Flank	0.0152093	2.51082e-16	4.66169e-16	0.0108394	9.20195e-11	0.00984837	1.49554e-06	2.51082e-16	229	216	4	3508102	3534286	LRPAP1	NEU_127_Alpha-2-MRAP	Yes - Rare	Primary,Trans,6,rs113617295,30719481,0.010,2.23e-12,4
103	3	Commonrare	37	52558445	52558667	NT5DC2	Trans-CDS	7.04299e-21	3.50446e-22	0.0715637	3.78109e-18	0.0140237	1.98055e-05	1.0762e-16	3.50446e-22	11	2	3	154741912	154901518	MME	NEU_143_NEP	Yes	Primary,Trans,3,rs35004449,52852897,0.369,2.54e-55,3
103	3	Commonrare	38	52109862	52110041	POC1A	Trans-Flank	3.57189e-07	3.45008e-11	9.11951e-05	3.35075e-10	5.09233e-07	0.00245913	5.78285e-07	3.45008e-11	258	173	3	154741912	154901518	MME	NEU_143_NEP	Yes	Primary,Trans,3,rs35004449,52852897,0.369,2.54e-55,3
78	6	Commonrare	38	31636854	31636989	XXbac-BPG32J3.22	Trans-Flank	0.0149349	2.52057e-16	4.6497e-16	0.0106542	9.10956e-11	0.00977444	1.42881e-06	2.52057e-16	227	215	4	3508102	3534286	LRPAP1	NEU_127_Alpha-2-MRAP	Yes - Rare	Primary,Trans,6,rs113617295,30719481,0.010,2.23e-12,4
103	3	Unweighted	38	52321069	52321274	GLYCTK	Trans-Flank	2.88377e-21	2.63935e-12	0.000155993	3.9292e-22	0.00870073	0.000115487	2.09161e-10	3.9292e-22	191	159	3	154741912	154901518	MME	NEU_143_NEP	Yes	Primary,Trans,3,rs35004449,52852897,0.369,2.54e-55,3
78	6	Rare only	39	32009085	32009267	TNXB	Trans-Flank	0.346811	6.29328e-13	5.01303e-16	0.318214	4.75761e-07	0.101076	4.46314e-06	5.01303e-16	168	170	4	3508102	3534286	LRPAP1	NEU_127_Alpha-2-MRAP	Yes - Rare	Primary,Trans,6,rs113617295,30719481,0.010,2.23e-12,4
103	3	Unweighted	39	52291465	52291575	WDR82	Trans-Flank	4.86261e-21	2.17568e-13	0.000190573	9.28325e-22	0.00763239	7.00585e-05	4.11265e-11	9.28325e-22	184	157	3	154741912	154901518	MME	NEU_143_NEP	Yes	Primary,Trans,3,rs35004449,52852897,0.369,2.54e-55,3
78	6	Rare only	40	31827455	31827762	NEU1	Trans-Flank	0.0651213	1.25213e-13	5.01515e-16	0.0634807	2.91114e-05	0.0332407	6.49677e-05	5.01515e-16	145	148	4	3508102	3534286	LRPAP1	NEU_127_Alpha-2-MRAP	Yes - Rare	Primary,Trans,6,rs113617295,30719481,0.010,2.23e-12,4
103	3	Unweighted	40	52279800	52280104	PPM1M	Trans-Flank	3.42494e-21	7.91055e-15	0.00352892	1.7626e-21	0.0149233	1.92372e-05	7.19434e-13	1.7626e-21	151	131	3	154741912	154901518	MME	NEU_143_NEP	Yes	Primary,Trans,3,rs35004449,52852897,0.369,2.54e-55,3
78	6	Rare only	41	31630002	31630527	GPANK1	Trans-Flank	0.0154311	1.23613e-15	1.08909e-15	0.0110782	6.57444e-10	0.0104768	3.74639e-06	1.08909e-15	227	210	4	3508102	3534286	LRPAP1	NEU_127_Alpha-2-MRAP	Yes - Rare	Primary,Trans,6,rs113617295,30719481,0.010,2.23e-12,4
103	3	Unweighted	41	52263009	52263257	TWF2	Trans-Flank	7.93644e-21	2.4759e-15	0.00426784	4.46459e-21	0.0255699	2.23568e-05	2.50266e-13	4.46459e-21	145	125	3	154741912	154901518	MME	NEU_143_NEP	Yes	Primary,Trans,3,rs35004449,52852897,0.369,2.54e-55,3
103	3	Rare only	42	48636520	48636665	UQCRC1	Trans-Flank	0.151889	6.03657e-06	2.73851e-11	0.161475	0.000132224	0.0768814	0.0128278	2.73851e-11	206	116	3	154741912	154901518	MME	NEU_143_NEP	Yes	Primary,Trans,3,rs35004449,52852897,0.369,2.54e-55,3
78	6	Rare only	42	32096467	32097597	FKBPL	Trans-Flank	0.250417	1.05133e-13	1.47336e-15	0.234549	3.55064e-08	0.0747371	1.04051e-06	1.47336e-15	157	162	4	3508102	3534286	LRPAP1	NEU_127_Alpha-2-MRAP	Yes - Rare	Primary,Trans,6,rs113617295,30719481,0.010,2.23e-12,4
103	3	Unweighted	42	52259557	52259691	RP11-330H6.5	Trans-Flank	8.06925e-21	1.93334e-15	0.00439863	4.60552e-21	0.0258021	2.26343e-05	1.98833e-13	4.60552e-21	146	123	3	154741912	154901518	MME	NEU_143_NEP	Yes	Primary,Trans,3,rs35004449,52852897,0.369,2.54e-55,3
78	6	Rare only	43	32083475	32083785	ATF6B	Trans-Flank	0.250782	1.09502e-13	1.47336e-15	0.234976	3.55131e-08	0.0746776	1.02156e-06	1.47336e-15	157	161	4	3508102	3534286	LRPAP1	NEU_127_Alpha-2-MRAP	Yes - Rare	Primary,Trans,6,rs113617295,30719481,0.010,2.23e-12,4
103	3	Unweighted	43	52255192	52258368	TLR9	Trans-Flank	6.96519e-21	3.4876e-16	0.0044003	4.6503e-21	0.023877	1.20165e-05	5.45894e-14	4.6503e-21	145	123	3	154741912	154901518	MME	NEU_143_NEP	Yes	Primary,Trans,3,rs35004449,52852897,0.369,2.54e-55,3
78	6	Rare only	44	31626799	31627764	C6orf47	Trans-Flank	0.0164673	3.1118e-15	1.61918e-15	0.0117574	4.15547e-08	0.013187	7.17036e-06	1.61918e-15	229	218	4	3508102	3534286	LRPAP1	NEU_127_Alpha-2-MRAP	Yes - Rare	Primary,Trans,6,rs113617295,30719481,0.010,2.23e-12,4
103	3	Unweighted	44	52233217	52233496	ALAS1	Trans-Flank	1.02651e-20	2.25389e-18	0.002537	7.38507e-21	0.0221389	3.20234e-06	6.47987e-15	7.38507e-21	142	117	3	154741912	154901518	MME	NEU_143_NEP	Yes	Primary,Trans,3,rs35004449,52852897,0.369,2.54e-55,3
78	6	Rare only	45	31623703	31623897	APOM	Trans-Flank	0.0164502	2.9509e-15	2.39816e-15	0.0118237	2.82516e-09	0.0109276	4.59455e-06	2.39816e-15	228	222	4	3508102	3534286	LRPAP1	NEU_127_Alpha-2-MRAP	Yes - Rare	Primary,Trans,6,rs113617295,30719481,0.010,2.23e-12,4
103	3	Commonrare	45	52255192	52258368	TLR9	Trans-CDS	1.39148e-14	2.88863e-17	0.419802	1.68185e-14	0.0429111	0.000327765	1.85911e-11	2.88863e-17	3	1	3	154741912	154901518	MME	NEU_143_NEP	Yes	Primary,Trans,3,rs35004449,52852897,0.369,2.54e-55,3
78	6	Rare only	46	32116958	32117215	PRRT1	Trans-Flank	0.185168	5.74279e-14	2.70167e-15	0.166054	1.80079e-10	0.0177983	3.28593e-07	2.70167e-15	156	195	4	3508102	3534286	LRPAP1	NEU_127_Alpha-2-MRAP	Yes - Rare	Primary,Trans,6,rs113617295,30719481,0.010,2.23e-12,4
103	3	Unweighted	46	52356418	52356831	DNAH1	Trans-CDS	5.64535e-16	4.14499e-07	1.76847e-05	3.36149e-17	9.82027e-05	0.000250812	6.03522e-07	3.36149e-17	43	24	3	154741912	154901518	MME	NEU_143_NEP	Yes	Primary,Trans,3,rs35004449,52852897,0.369,2.54e-55,3
78	6	Rare only	47	27100810	27101283	HIST1H2AG	Trans-Flank	0.202224	5.27375e-08	3.30807e-15	0.180018	1.19677e-07	0.0667764	0.000215386	3.30807e-15	146	97	4	3508102	3534286	LRPAP1	NEU_127_Alpha-2-MRAP	Yes - Rare	Primary,Trans,6,rs113617295,30719481,0.010,2.23e-12,4
103	3	Unweighted	47	52321069	52321274	GLYCTK	Trans-CDS	4.79737e-15	6.93037e-13	0.562022	8.7251e-17	0.239984	0.0358958	2.71106e-10	8.7251e-17	2	3	3	154741912	154901518	MME	NEU_143_NEP	Yes	Primary,Trans,3,rs35004449,52852897,0.369,2.54e-55,3
78	6	Rare only	48	27094160	27094281	HIST1H2BJ	Trans-Flank	0.206453	4.54107e-08	3.30807e-15	0.186218	1.19373e-07	0.0746505	0.000348256	3.30807e-15	146	100	4	3508102	3534286	LRPAP1	NEU_127_Alpha-2-MRAP	Yes - Rare	Primary,Trans,6,rs113617295,30719481,0.010,2.23e-12,4
103	3	Commonrare	48	53125878	53126126	RFT1	Trans-CDS	2.09584e-08	4.53945e-16	0.0463423	5.72029e-12	0.034758	2.2095e-11	2.15616e-12	4.53945e-16	2	2	3	154741912	154901518	MME	NEU_143_NEP	Yes	Primary,Trans,3,rs35004449,52852897,0.369,2.54e-55,3
103	3	Commonrare	49	52233217	52233496	ALAS1	Trans-CDS	5.23452e-10	5.17298e-15	0.0059414	5.67311e-10	0.0610156	5.14639e-06	7.48553e-11	5.17298e-15	3	4	3	154741912	154901518	MME	NEU_143_NEP	Yes	Primary,Trans,3,rs35004449,52852897,0.369,2.54e-55,3
78	6	Rare only	49	31913958	31914102	CFB	Trans-Flank	0.12307	2.94992e-11	3.51042e-15	0.111617	0.000105339	0.0542021	0.000249298	3.51042e-15	105	101	4	3508102	3534286	LRPAP1	NEU_127_Alpha-2-MRAP	Yes - Rare	Primary,Trans,6,rs113617295,30719481,0.010,2.23e-12,4
103	3	Commonrare	50	53212398	53212593	PRKCD	Trans-Flank	5.69122e-13	1.79552e-14	0.000432871	3.69562e-12	0.000104359	4.64004e-09	9.50446e-12	1.79552e-14	135	221	3	154741912	154901518	MME	NEU_143_NEP	Yes	Primary,Trans,3,rs35004449,52852897,0.369,2.54e-55,3
78	6	Rare only	50	31912914	31913003	XXbac-BPG116M5.17	Trans-Flank	0.123072	3.07939e-11	3.60419e-15	0.111622	0.000105598	0.0542168	0.000252337	3.60419e-15	106	101	4	3508102	3534286	LRPAP1	NEU_127_Alpha-2-MRAP	Yes - Rare	Primary,Trans,6,rs113617295,30719481,0.010,2.23e-12,4
103	3	Commonrare	51	53363292	53363511	CACNA1D	Trans-Flank	2.72141e-12	1.2374e-13	0.00236504	7.72317e-11	2.72409e-06	1.33809e-07	1.44927e-11	1.2374e-13	343	331	3	154741912	154901518	MME	NEU_143_NEP	Yes	Primary,Trans,3,rs35004449,52852897,0.369,2.54e-55,3
78	6	Commonrare	51	32780952	32781068	HLA-DOB	Trans-Flank	0.00251928	3.69001e-15	3.49381e-13	0.0022837	6.67793e-08	0.0102729	1.48496e-05	3.69001e-15	107	305	4	3508102	3534286	LRPAP1	NEU_127_Alpha-2-MRAP	Yes - Rare	Primary,Trans,6,rs113617295,30719481,0.010,2.23e-12,4
103	3	Commonrare	52	53111756	53111884	RP11-894J14.5	Trans-CDS	7.01956e-11	1.51028e-13	0.0288684	6.10431e-11	0.0256727	1.24858e-11	5.07273e-09	1.51028e-13	2	1	3	154741912	154901518	MME	NEU_143_NEP	Yes	Primary,Trans,3,rs35004449,52852897,0.369,2.54e-55,3
78	6	Commonrare	52	32781503	32781650	XXbac-BPG246D15.9	Trans-Flank	0.00248836	5.03352e-15	1.89856e-13	0.00232399	2.1832e-07	0.0106871	1.74386e-05	5.03352e-15	117	319	4	3508102	3534286	LRPAP1	NEU_127_Alpha-2-MRAP	Yes - Rare	Primary,Trans,6,rs113617295,30719481,0.010,2.23e-12,4
103	3	Commonrare	53	53259731	53259987	TKT	Trans-Flank	8.47822e-12	7.07519e-13	0.000441903	6.4759e-11	0.000257105	4.80263e-07	1.69942e-10	7.07519e-13	142	214	3	154741912	154901518	MME	NEU_143_NEP	Yes	Primary,Trans,3,rs35004449,52852897,0.369,2.54e-55,3
78	6	Rare only	53	31606867	31607043	BAG6	Trans-Flank	0.0250017	1.19633e-14	5.93801e-15	0.0157081	6.36775e-08	0.0178564	6.22281e-06	5.93801e-15	243	262	4	3508102	3534286	LRPAP1	NEU_127_Alpha-2-MRAP	Yes - Rare	Primary,Trans,6,rs113617295,30719481,0.010,2.23e-12,4
103	3	Commonrare	54	53321557	53321718	DCP1A	Trans-Flank	2.26641e-08	1.26829e-12	8.75793e-05	4.28776e-08	3.26819e-05	1.19707e-05	6.05672e-08	1.26829e-12	121	162	3	154741912	154901518	MME	NEU_143_NEP	Yes	Primary,Trans,3,rs35004449,52852897,0.369,2.54e-55,3
78	6	Rare only	54	31636854	31636989	XXbac-BPG32J3.22	Trans-CDS	0.78826	1.08488e-12	1.2655e-14	0.0502457	9.85948e-13	0.00798674	5.54442e-10	1.2655e-14	2	1	4	3508102	3534286	LRPAP1	NEU_127_Alpha-2-MRAP	Yes - Rare	Primary,Trans,6,rs113617295,30719481,0.010,2.23e-12,4
103	3	Rare only	55	48711936	48712220	NCKIPSD	Trans-Flank	0.144813	4.04074e-06	3.38913e-12	0.157343	3.78211e-07	0.0944237	0.0141482	3.38913e-12	173	91	3	154741912	154901518	MME	NEU_143_NEP	Yes	Primary,Trans,3,rs35004449,52852897,0.369,2.54e-55,3
78	6	Rare only	55	31733330	31733587	VWA7	Trans-CDS	0.124914	4.29249e-13	1.51036e-14	0.0944061	1.00222e-11	0.0200941	4.94942e-11	1.51036e-14	8	7	4	3508102	3534286	LRPAP1	NEU_127_Alpha-2-MRAP	Yes - Rare	Primary,Trans,6,rs113617295,30719481,0.010,2.23e-12,4
103	3	Rare only	56	48663378	48663473	SLC26A6	Trans-Flank	0.178719	4.47349e-06	6.44021e-12	0.191335	0.000114711	0.100382	0.0154406	6.44021e-12	203	114	3	154741912	154901518	MME	NEU_143_NEP	Yes	Primary,Trans,3,rs35004449,52852897,0.369,2.54e-55,3
78	6	Rare only	56	31831363	31831565	SLC44A4	Trans-Flank	0.0634422	3.41003e-12	1.54932e-14	0.0602498	0.000102568	0.0322853	0.000105109	1.54932e-14	158	165	4	3508102	3534286	LRPAP1	NEU_127_Alpha-2-MRAP	Yes - Rare	Primary,Trans,6,rs113617295,30719481,0.010,2.23e-12,4
103	3	Commonrare	57	54156700	54156902	CACNA2D3	Trans-Flank	5.7062e-06	9.56684e-12	7.71903e-05	3.17909e-06	3.73325e-05	1.04325e-09	7.99824e-08	9.56684e-12	370	403	3	154741912	154901518	MME	NEU_143_NEP	Yes	Primary,Trans,3,rs35004449,52852897,0.369,2.54e-55,3
78	6	Commonrare	57	32821966	32822106	PSMB9	Trans-Flank	0.00434037	1.61518e-14	7.21138e-14	0.00424616	0.000767201	0.0275682	0.000157837	1.61518e-14	124	342	4	3508102	3534286	LRPAP1	NEU_127_Alpha-2-MRAP	Yes - Rare	Primary,Trans,6,rs113617295,30719481,0.010,2.23e-12,4
103	3	Rare only	58	48675597	48675705	CELSR3	Trans-Flank	0.140461	4.56394e-06	1.21623e-11	0.154613	7.44397e-05	0.0904789	0.0133578	1.21623e-11	204	118	3	154741912	154901518	MME	NEU_143_NEP	Yes	Primary,Trans,3,rs35004449,52852897,0.369,2.54e-55,3
78	6	Rare only	58	32009085	32009267	TNXB	Trans-CDS	0.0964261	9.51359e-10	1.72001e-14	0.204522	9.94981e-06	0.0966593	0.000117196	1.72001e-14	40	31	4	3508102	3534286	LRPAP1	NEU_127_Alpha-2-MRAP	Yes - Rare	Primary,Trans,6,rs113617295,30719481,0.010,2.23e-12,4
78	6	Rare only	59	30876773	30876990	GTF2H4	Trans-Flank	0.728151	1.68084e-11	2.16896e-14	0.673764	2.8451e-08	0.299766	0.00408661	2.16896e-14	167	291	4	3508102	3534286	LRPAP1	NEU_127_Alpha-2-MRAP	Yes - Rare	Primary,Trans,6,rs113617295,30719481,0.010,2.23e-12,4
78	6	Rare only	60	30882148	30882286	VARS2	Trans-Flank	0.697701	2.00997e-11	2.33055e-14	0.640664	1.57077e-10	0.267014	0.00297829	2.33055e-14	161	273	4	3508102	3534286	LRPAP1	NEU_127_Alpha-2-MRAP	Yes - Rare	Primary,Trans,6,rs113617295,30719481,0.010,2.23e-12,4
78	6	Commonrare	61	32790025	32790135	TAP2	Trans-Flank	0.00267808	2.44629e-14	9.63217e-13	0.00244644	9.08246e-07	0.0143383	4.52497e-05	2.44629e-14	102	308	4	3508102	3534286	LRPAP1	NEU_127_Alpha-2-MRAP	Yes - Rare	Primary,Trans,6,rs113617295,30719481,0.010,2.23e-12,4
78	6	Commonrare	62	32808695	32808864	PSMB8	Trans-Flank	0.00374601	2.68367e-14	1.90134e-13	0.00339014	6.5742e-05	0.0227596	9.29937e-05	2.68367e-14	121	324	4	3508102	3534286	LRPAP1	NEU_127_Alpha-2-MRAP	Yes - Rare	Primary,Trans,6,rs113617295,30719481,0.010,2.23e-12,4
78	6	Commonrare	63	32813315	32813602	TAP1	Trans-Flank	0.00412928	3.00849e-14	1.85535e-13	0.00403069	0.00066443	0.0275685	0.00014909	3.00849e-14	126	341	4	3508102	3534286	LRPAP1	NEU_127_Alpha-2-MRAP	Yes - Rare	Primary,Trans,6,rs113617295,30719481,0.010,2.23e-12,4
78	6	Rare only	64	31590526	31590718	PRRC2A	Trans-Flank	0.04708	1.14025e-12	7.62139e-14	0.0357848	8.02065e-08	0.0554093	6.91398e-05	7.62139e-14	268	304	4	3508102	3534286	LRPAP1	NEU_127_Alpha-2-MRAP	Yes - Rare	Primary,Trans,6,rs113617295,30719481,0.010,2.23e-12,4
78	6	Rare only	65	26158357	26158818	HIST1H2BD	Trans-Flank	0.0738481	4.11045e-08	1.0524e-13	0.074724	2.38705e-05	0.033243	0.00375897	1.0524e-13	192	247	4	3508102	3534286	LRPAP1	NEU_127_Alpha-2-MRAP	Yes - Rare	Primary,Trans,6,rs113617295,30719481,0.010,2.23e-12,4
78	6	Rare only	66	26183983	26184444	HIST1H2BE	Trans-Flank	0.0805777	4.71377e-08	1.07451e-13	0.0821985	2.12686e-05	0.03564	0.00361639	1.07451e-13	205	257	4	3508102	3534286	LRPAP1	NEU_127_Alpha-2-MRAP	Yes - Rare	Primary,Trans,6,rs113617295,30719481,0.010,2.23e-12,4
78	6	Rare only	67	26156578	26157318	HIST1H1E	Trans-Flank	0.0766036	3.3015e-08	1.14076e-13	0.0768231	2.52261e-05	0.0343651	0.00386471	1.14076e-13	196	251	4	3508102	3534286	LRPAP1	NEU_127_Alpha-2-MRAP	Yes - Rare	Primary,Trans,6,rs113617295,30719481,0.010,2.23e-12,4
78	6	Rare only	68	31582963	31583110	AIF1	Trans-Flank	0.0558851	1.73398e-12	1.20152e-13	0.0432202	7.08247e-08	0.0539063	8.67145e-05	1.20152e-13	243	283	4	3508102	3534286	LRPAP1	NEU_127_Alpha-2-MRAP	Yes - Rare	Primary,Trans,6,rs113617295,30719481,0.010,2.23e-12,4
78	6	Rare only	69	31847820	31848081	EHMT2	Trans-Flank	0.0687744	2.32934e-11	2.06909e-13	0.0668976	0.000194807	0.0322119	0.000201249	2.06909e-13	143	154	4	3508102	3534286	LRPAP1	NEU_127_Alpha-2-MRAP	Yes - Rare	Primary,Trans,6,rs113617295,30719481,0.010,2.23e-12,4
78	6	Rare only	70	30899224	30899391	SFTA2	Trans-Flank	0.50369	1.71637e-10	2.18712e-13	0.448422	7.32661e-09	0.167548	0.00225161	2.18712e-13	133	205	4	3508102	3534286	LRPAP1	NEU_127_Alpha-2-MRAP	Yes - Rare	Primary,Trans,6,rs113617295,30719481,0.010,2.23e-12,4
78	6	Rare only	71	26123711	26124172	HIST1H2BC	Trans-Flank	0.14612	8.17399e-11	3.40557e-13	0.138351	3.02357e-06	0.0270969	0.00111471	3.40557e-13	224	271	4	3508102	3534286	LRPAP1	NEU_127_Alpha-2-MRAP	Yes - Rare	Primary,Trans,6,rs113617295,30719481,0.010,2.23e-12,4
78	6	Rare only	72	26124420	26124893	HIST1H2AC	Trans-Flank	0.132564	8.38679e-11	3.44519e-13	0.129251	3.29401e-06	0.0261845	0.00120363	3.44519e-13	225	277	4	3508102	3534286	LRPAP1	NEU_127_Alpha-2-MRAP	Yes - Rare	Primary,Trans,6,rs113617295,30719481,0.010,2.23e-12,4
78	6	Rare only	73	30902359	30902491	DPCR1	Trans-Flank	0.512452	9.41999e-10	5.15253e-13	0.461129	5.15456e-08	0.183032	0.00281809	5.15253e-13	148	236	4	3508102	3534286	LRPAP1	NEU_127_Alpha-2-MRAP	Yes - Rare	Primary,Trans,6,rs113617295,30719481,0.010,2.23e-12,4
78	6	Rare only	74	26017272	26018000	HIST1H1A	Trans-Flank	0.538159	3.84538e-08	7.54331e-13	0.569043	0.00113031	0.121472	0.00742307	7.54331e-13	155	175	4	3508102	3534286	LRPAP1	NEU_127_Alpha-2-MRAP	Yes - Rare	Primary,Trans,6,rs113617295,30719481,0.010,2.23e-12,4
78	6	Commonrare	75	31867662	31869122	ZBTB12	Trans-CDS	0.016078	1.08276e-12	5.64454e-11	0.00368645	1.51166e-09	0.000427831	6.44762e-10	1.08276e-12	1	2	4	3508102	3534286	LRPAP1	NEU_127_Alpha-2-MRAP	Yes - Rare	Primary,Trans,6,rs113617295,30719481,0.010,2.23e-12,4
78	6	Rare only	76	31590526	31590718	PRRC2A	Trans-CDS	0.0578258	7.96967e-12	1.09764e-12	0.0287378	5.26002e-10	0.016457	1.06966e-06	1.09764e-12	30	17	4	3508102	3534286	LRPAP1	NEU_127_Alpha-2-MRAP	Yes - Rare	Primary,Trans,6,rs113617295,30719481,0.010,2.23e-12,4
78	6	Rare only	77	30852956	30853048	DDR1	Trans-Flank	0.747202	4.7869e-10	1.12957e-12	0.720036	1.66269e-07	0.396408	0.0153214	1.12957e-12	170	314	4	3508102	3534286	LRPAP1	NEU_127_Alpha-2-MRAP	Yes - Rare	Primary,Trans,6,rs113617295,30719481,0.010,2.23e-12,4
78	6	Commonrare	78	32813315	32813602	TAP1	Trans-CDS	1.0533e-05	1.80719e-12	1.98024e-11	0.00333913	2.12018e-10	0.00737113	1.07949e-06	1.80719e-12	7	14	4	3508102	3534286	LRPAP1	NEU_127_Alpha-2-MRAP	Yes - Rare	Primary,Trans,6,rs113617295,30719481,0.010,2.23e-12,4
78	6	Rare only	79	26188952	26189344	HIST1H4D	Trans-Flank	0.134387	9.40246e-08	2.04757e-12	0.101816	2.34715e-05	0.0392704	0.00448207	2.04757e-12	219	274	4	3508102	3534286	LRPAP1	NEU_127_Alpha-2-MRAP	Yes - Rare	Primary,Trans,6,rs113617295,30719481,0.010,2.23e-12,4
78	6	Rare only	80	26033363	26033836	HIST1H2AB	Trans-Flank	0.583531	5.5431e-08	3.08593e-12	0.606996	0.000843328	0.118631	0.0127599	3.08593e-12	168	211	4	3508102	3534286	LRPAP1	NEU_127_Alpha-2-MRAP	Yes - Rare	Primary,Trans,6,rs113617295,30719481,0.010,2.23e-12,4
78	6	Rare only	81	26031837	26032328	HIST1H3B	Trans-Flank	0.58098	4.47384e-08	3.08593e-12	0.598873	0.000841972	0.110561	0.011819	3.08593e-12	168	208	4	3508102	3534286	LRPAP1	NEU_127_Alpha-2-MRAP	Yes - Rare	Primary,Trans,6,rs113617295,30719481,0.010,2.23e-12,4
78	6	Rare only	82	26087628	26087784	HFE	Trans-Flank	0.409232	1.28388e-09	3.22789e-12	0.371233	9.60103e-05	0.0491405	0.00297211	3.22789e-12	196	222	4	3508102	3534286	LRPAP1	NEU_127_Alpha-2-MRAP	Yes - Rare	Primary,Trans,6,rs113617295,30719481,0.010,2.23e-12,4
78	6	Rare only	83	26055974	26056696	HIST1H1C	Trans-Flank	0.576657	5.36758e-08	5.9766e-12	0.595306	0.000701604	0.123407	0.0112771	5.9766e-12	169	208	4	3508102	3534286	LRPAP1	NEU_127_Alpha-2-MRAP	Yes - Rare	Primary,Trans,6,rs113617295,30719481,0.010,2.23e-12,4
78	6	Rare only	84	26107657	26108361	HIST1H1T	Trans-Flank	0.236314	4.63583e-08	6.79825e-12	0.180934	5.17342e-05	0.0323419	0.00269396	6.79825e-12	224	266	4	3508102	3534286	LRPAP1	NEU_127_Alpha-2-MRAP	Yes - Rare	Primary,Trans,6,rs113617295,30719481,0.010,2.23e-12,4
78	6	Rare only	85	26045598	26046089	HIST1H3C	Trans-Flank	0.581161	5.38813e-08	6.82788e-12	0.605337	0.000753684	0.12573	0.0124465	6.82788e-12	166	211	4	3508102	3534286	LRPAP1	NEU_127_Alpha-2-MRAP	Yes - Rare	Primary,Trans,6,rs113617295,30719481,0.010,2.23e-12,4
78	6	Rare only	86	26043464	26043925	HIST1H2BB	Trans-Flank	0.582767	5.80146e-08	7.19931e-12	0.609987	0.00078411	0.127095	0.0132626	7.19931e-12	168	213	4	3508102	3534286	LRPAP1	NEU_127_Alpha-2-MRAP	Yes - Rare	Primary,Trans,6,rs113617295,30719481,0.010,2.23e-12,4
78	6	Rare only	87	32121363	32121453	PPT2	Trans-Flank	0.221289	4.33183e-11	9.22795e-12	0.207574	2.33185e-08	0.0182818	1.19831e-06	9.22795e-12	161	209	4	3508102	3534286	LRPAP1	NEU_127_Alpha-2-MRAP	Yes - Rare	Primary,Trans,6,rs113617295,30719481,0.010,2.23e-12,4
78	6	Rare only	88	26197329	26197534	HIST1H3D	Trans-Flank	0.13839	1.14773e-07	1.07669e-11	0.107041	1.56679e-05	0.0374368	0.00393697	1.07669e-11	224	276	4	3508102	3534286	LRPAP1	NEU_127_Alpha-2-MRAP	Yes - Rare	Primary,Trans,6,rs113617295,30719481,0.010,2.23e-12,4
78	6	Rare only	89	26197329	26197534	HIST1H3D	Trans-Flank	0.13839	1.14773e-07	1.07669e-11	0.107041	1.56679e-05	0.0374368	0.00393697	1.07669e-11	224	276	4	3508102	3534286	LRPAP1	NEU_127_Alpha-2-MRAP	Yes - Rare	Primary,Trans,6,rs113617295,30719481,0.010,2.23e-12,4
78	6	Rare only	90	26199038	26199511	HIST1H2AD	Trans-Flank	0.138394	1.14772e-07	1.08536e-11	0.107045	1.57099e-05	0.0374421	0.00395188	1.08536e-11	223	276	4	3508102	3534286	LRPAP1	NEU_127_Alpha-2-MRAP	Yes - Rare	Primary,Trans,6,rs113617295,30719481,0.010,2.23e-12,4
78	6	Rare only	91	32133902	32134083	EGFL8	Trans-Flank	0.222758	5.00186e-11	1.15636e-11	0.204896	2.76578e-08	0.0159967	1.17038e-06	1.15636e-11	156	204	4	3508102	3534286	LRPAP1	NEU_127_Alpha-2-MRAP	Yes - Rare	Primary,Trans,6,rs113617295,30719481,0.010,2.23e-12,4
78	6	Rare only	92	32132315	32132474	PPT2-EGFL8	Trans-Flank	0.222507	4.55836e-11	1.1625e-11	0.203486	2.78671e-08	0.015211	7.85092e-07	1.1625e-11	157	198	4	3508102	3534286	LRPAP1	NEU_127_Alpha-2-MRAP	Yes - Rare	Primary,Trans,6,rs113617295,30719481,0.010,2.23e-12,4
78	6	Rare only	93	24809904	24810075	FAM65B	Trans-Flank	0.325373	6.60063e-10	1.21043e-11	0.247977	1.42876e-07	0.0221448	4.16742e-05	1.21043e-11	268	215	4	3508102	3534286	LRPAP1	NEU_127_Alpha-2-MRAP	Yes - Rare	Primary,Trans,6,rs113617295,30719481,0.010,2.23e-12,4
78	6	Rare only	94	26020677	26021168	HIST1H3A	Trans-Flank	0.542894	5.85462e-08	1.30872e-11	0.579655	0.00114728	0.120641	0.0076467	1.30872e-11	155	176	4	3508102	3534286	LRPAP1	NEU_127_Alpha-2-MRAP	Yes - Rare	Primary,Trans,6,rs113617295,30719481,0.010,2.23e-12,4
78	6	Rare only	95	31555036	31555135	LST1	Trans-Flank	0.0672316	7.49734e-11	1.55811e-11	0.0541381	1.12493e-06	0.120359	0.00087857	1.55811e-11	240	361	4	3508102	3534286	LRPAP1	NEU_127_Alpha-2-MRAP	Yes - Rare	Primary,Trans,6,rs113617295,30719481,0.010,2.23e-12,4
78	6	Rare only	96	31556803	31556993	NCR3	Trans-Flank	0.061614	6.39256e-11	1.57327e-11	0.0488773	1.22895e-06	0.11241	0.000808886	1.57327e-11	244	366	4	3508102	3534286	LRPAP1	NEU_127_Alpha-2-MRAP	Yes - Rare	Primary,Trans,6,rs113617295,30719481,0.010,2.23e-12,4
78	6	Rare only	97	26055974	26056696	HIST1H1C	Trans-CDS	0.69591	6.8852e-10	1.6364e-11	0.47009	2.16279e-09	0.0215878	7.128e-09	1.6364e-11	6	4	4	3508102	3534286	LRPAP1	NEU_127_Alpha-2-MRAP	Yes - Rare	Primary,Trans,6,rs113617295,30719481,0.010,2.23e-12,4
78	6	Rare only	98	31867662	31869122	ZBTB12	Trans-Flank	0.094753	3.7077e-10	2.53321e-11	0.0739752	0.000390505	0.0355229	0.000359334	2.53321e-11	132	146	4	3508102	3534286	LRPAP1	NEU_127_Alpha-2-MRAP	Yes - Rare	Primary,Trans,6,rs113617295,30719481,0.010,2.23e-12,4
78	6	Rare only	99	31868803	31868956	C2	Trans-Flank	0.0915517	3.894e-10	2.61596e-11	0.0734465	0.000413242	0.0362435	0.000380435	2.61596e-11	134	149	4	3508102	3534286	LRPAP1	NEU_127_Alpha-2-MRAP	Yes - Rare	Primary,Trans,6,rs113617295,30719481,0.010,2.23e-12,4
78	6	Rare only	100	26199746	26200207	HIST1H2BF	Trans-Flank	0.139612	1.22314e-07	2.69528e-11	0.109297	1.71124e-05	0.037701	0.00404953	2.69528e-11	224	278	4	3508102	3534286	LRPAP1	NEU_127_Alpha-2-MRAP	Yes - Rare	Primary,Trans,6,rs113617295,30719481,0.010,2.23e-12,4
78	6	Rare only	101	26027128	26027520	HIST1H4B	Trans-Flank	0.574674	7.04031e-08	2.87961e-11	0.582833	0.0009473	0.0978729	0.00931828	2.87961e-11	169	200	4	3508102	3534286	LRPAP1	NEU_127_Alpha-2-MRAP	Yes - Rare	Primary,Trans,6,rs113617295,30719481,0.010,2.23e-12,4
78	6	Rare only	102	26021866	26022258	HIST1H4A	Trans-Flank	0.542968	6.84192e-08	3.14837e-11	0.575471	0.00125099	0.12221	0.00786617	3.14837e-11	155	175	4	3508102	3534286	LRPAP1	NEU_127_Alpha-2-MRAP	Yes - Rare	Primary,Trans,6,rs113617295,30719481,0.010,2.23e-12,4
78	6	Rare only	103	26104135	26104527	HIST1H4C	Trans-Flank	0.27699	4.00516e-08	3.33413e-11	0.211712	0.00014672	0.0368691	0.00417853	3.33413e-11	211	253	4	3508102	3534286	LRPAP1	NEU_127_Alpha-2-MRAP	Yes - Rare	Primary,Trans,6,rs113617295,30719481,0.010,2.23e-12,4
78	6	Rare only	104	31730791	31730985	SAPCD1	Trans-CDS	0.137487	1.14168e-08	9.99645e-11	0.0894259	1.32e-08	3.00868e-07	1.55949e-07	9.99645e-11	5	1	4	3508102	3534286	LRPAP1	NEU_127_Alpha-2-MRAP	Yes - Rare	Primary,Trans,6,rs113617295,30719481,0.010,2.23e-12,4
78	6	Rare only	104	26197027	26197518	HIST1H3D	Trans-Flank	0.139608	1.75264e-07	4.08178e-11	0.107881	2.90453e-05	0.038742	0.00492573	4.08178e-11	223	276	4	3508102	3534286	LRPAP1	NEU_127_Alpha-2-MRAP	Yes - Rare	Primary,Trans,6,rs113617295,30719481,0.010,2.23e-12,4
78	6	Rare only	105	26197027	26197518	HIST1H3D	Trans-Flank	0.139608	1.75264e-07	4.08178e-11	0.107881	2.90453e-05	0.038742	0.00492573	4.08178e-11	223	276	4	3508102	3534286	LRPAP1	NEU_127_Alpha-2-MRAP	Yes - Rare	Primary,Trans,6,rs113617295,30719481,0.010,2.23e-12,4
78	6	Rare only	106	31543478	31543744	TNF	Trans-Flank	0.0720383	2.17852e-10	4.54319e-11	0.0634435	1.80054e-06	0.130988	0.00128367	4.54319e-11	234	358	4	3508102	3534286	LRPAP1	NEU_127_Alpha-2-MRAP	Yes - Rare	Primary,Trans,6,rs113617295,30719481,0.010,2.23e-12,4
78	6	Rare only	107	31548445	31548980	LTB	Trans-Flank	0.0702629	1.92106e-10	4.71694e-11	0.0592382	1.90231e-06	0.132782	0.00123711	4.71694e-11	235	359	4	3508102	3534286	LRPAP1	NEU_127_Alpha-2-MRAP	Yes - Rare	Primary,Trans,6,rs113617295,30719481,0.010,2.23e-12,4
78	6	Rare only	108	31540479	31540658	LTA	Trans-Flank	0.0752999	3.2717e-10	6.9572e-11	0.0666969	2.21112e-06	0.144329	0.001463	6.9572e-11	235	365	4	3508102	3534286	LRPAP1	NEU_127_Alpha-2-MRAP	Yes - Rare	Primary,Trans,6,rs113617295,30719481,0.010,2.23e-12,4
