# Supplementary material for: The contribution of rare whole genome sequencing variants to plasma protein levels and to the missing heritability
Source: Research Square preprint supplement (doi:10.21203/rs.3.rs-625433/v1), 2021-06-21
Supplement: Supplementary file 2 [file dae8ab58a956bbe10afb47c2.xlsx]

## Sheet: TableS3
Supplementary Table S3. SKAT results for Cis-associations
*coordinates are in HG19
Protein/gene info					P-values for the seven SKAT methods							Number of SNVs and indels		GWAS	GWAS adjusted SKAT analsyes. P-values for the seven SKAT methods when adjusting for significant GWAS hits. Only the most significant SNV-set per protein was analyzed, and the P-value was adjusted for the number of proteins included in these conditional analyses and the number of models tested.
Protein	Chr	Pos start*	Pos end*	SNV-set type	Model 1 - Unweighted	Model 2 - Eigen/CADD-weighted	Model 3 - MAF weight - B(1,25)	Model 4 - MAF weight - B(1,5)	Model 5 - MAF weight - B(0.5,0.5)	Model 6 - CommonRare	Model 7 - Rare only	N rare	N common	GWAS SNP (RS-id and effective allele frequency). Primary; conditional	Model 1 - Unweighted	Model 2 - Eigen/CADD-weighted	Model 3 - MAF weight - B(1,25)	Model 4 - MAF weight - B(1,5)	Model 5 - MAF weight - B(0.5,0.5)	Model 6 - CommonRare	Model 7 - Rare only	Multiple-testing significant
AGRP	16	67516473	67517716	Cis-Reg	0.000713738	2.79e-18	2.46e-19	4.64e-05	6.02e-16	2.46e-18	1.61e-19	3	1
AZU1	19	825096	832018	CDS-regions	0.0503219	9.88e-06	2.52e-09	0.00146388	3.91e-05	1.45e-07	2.37e-10	7	5	rs372854624 0.01
AZU1	19	825096	832018	Cis-Reg	0.0843776	0.111748	2.98e-05	0.0183708	0.0094583	5.59e-05	7.21e-07	26	16	rs372854624 0.01
CADM3	1	159141398	159173103	CDS-regions	0.00290049	1.17e-24	1.38e-25	2.71e-12	8.49e-16	1.15e-22	2.49e-27	7	2	rs3026987 0.011; rs77292073 0.017	0.00201197	1.7604e-24	1.80998e-25	2.68351e-12	7.05684e-16	6.75271e-23	5.42041e-26	Yes
CADM3	1	159141398	159173103	Cis-Reg	0.0411548	0.0254094	2.19e-05	0.0126897	0.010106	1.05e-06	6.16e-07	46	21	rs3026987 0.011; rs77292073 0.017
CCL15	17	34323475	34329084	CDS-regions	1.46e-05	1.33e-05	1.46e-05	1.46e-05	1.46e-05	2.8e-06	2.8e-06	2	0	rs854624 0.044
CD163	12	7623408	7656489	CDS-regions	0.407141	0.0113411	0.000308243	0.0955005	0.0498145	2.31e-06	2.02e-07	7	8		0.413579	0.013296	0.000362877	0.109812	0.0512242	1.78024e-06	7.82835e-07	Yes
CXCL6	4	74702213	74714781	CDS-regions	7.31e-09	7.31e-09	7.31e-09	7.31e-09	7.31e-09	4.24e-10	4.24e-10	1	0	rs16850073 0.439
CXCL8	4	74606222	74609433	CDS-regions	5.11e-07	5.11e-07	5.11e-07	5.11e-07	5.11e-07	4.78e-07	4.78e-07	1	0
CYR61	1	86046443	86049645	CDS-regions	4.79e-16	9.91e-16	2.03e-16	4.3e-16	3.35e-14	8.98e-18	8.98e-18	3	0	rs187133983 0.011	3.06326e-14	5.63047e-14	1.49754e-14	2.79976e-14	2.10384e-12	1.13388e-14	1.13388e-14	Yes
DLL1	6	170591293	170615653	CDS-regions	0.000140497	0.162855	7.68e-06	0.00831143	0.000135958	2.84e-06	9.5e-07	15	4	rs11961095 0.04
EFNA4	1	155036206	155042029	CDS-regions	9.11e-05	3.05e-15	1.31e-13	1.59e-05	6.42e-17	6.36e-17	1.33e-17	1	1
EPCAM	2	47572296	47614740	Cis-Reg	0.177064	0.136034	0.0409732	0.237443	0.0400955	0.00033719	2.07e-06	54	41	2:49144591 0.01
F2R	5	76011867	76031606	CDS-regions	1.62e-11	4.01e-11	1.16e-11	1.54e-11	4.12e-08	2.83e-13	2.83e-13	5	0	rs2432189 0.452
NRCAM	7	107788067	108097161	CDS-regions	0.000933355	0.00639406	3.12e-07	1.18e-06	2.5e-05	2.73e-07	7.75e-08	7	16	rs17334792 0.473; rs145370708 0.295
PGF	14	75408536	75422487	CDS-regions	4.35e-06	5.14e-06	4.05e-06	4.29e-06	3.22e-05	4.83e-07	4.83e-07	4	0
PRELP	1	203444955	203460480	CDS-regions	0.0249917	0.0798404	2.81e-05	0.0101673	4.22e-05	0.000101743	5.25e-06	5	1		0.0361921	0.106166	6.87077e-05	0.0159972	0.000102116	0.000282358	1.35809e-05	Yes
SELP	1	169558086	169599431	CDS-regions	7.51e-12	2.71e-17	8.14e-19	1.12e-10	8.33e-15	1.48e-36	3.55e-38	10	12	rs139249907 0.017; rs9332575 0.1; rs2298903 0.36	7.7905e-06	1.30956e-18	5.39022e-18	9.40727e-05	1.43442e-07	8.5563e-34	1.28058e-40	Yes
THY1	11	119288087	119295695	Cis-Flank	1.08e-09	4.52e-10	1.59e-08	3.02e-12	3.75e-12	2.31e-20	9.91e-22	120	125	rs55933700 0.02; rs587985 0.412	0.191387	0.191713	0.0769838	0.186078	0.0975822	0.175776	0.102445
THY1	11	119288087	119295695	Cis-Reg	0.000179391	0.00598232	3.97e-10	9.31e-06	1.13e-05	1.36e-13	5.58e-17	20	18	rs55933700 0.02; rs587985 0.412
TNFRSF21	6	47199267	47277641	CDS-regions	0.0473234	5.79e-05	0.00320041	0.0341272	0.000489903	6.62e-05	6.33e-08	7	1
CCL15	17	34323475	34329084	Cis-Reg	5.86e-41	1e-49	3.7e-48	1.71e-48	8.31e-51	7.36e-60	5.71e-27	17	28	rs854624 0.044	0.0171731	0.0362086	0.253377	0.215203	0.138415	0.0487257	0.160138
LGALS1	22	38071614	38075813	CDS-regions	3.39e-10	1.17e-17	1.28e-21	5.54e-12	7.01e-22	7.85e-31	5.27e-26	4	3	rs139136100 0.012; rs13058368 0.478	0.00122432	9.11083e-14	1.55989e-19	1.21526e-06	1.2924e-14	2.17842e-20	3.05474e-24	Yes
IGFBP7	4	57896938	57976551	CDS-regions	0.00827314	2.82e-13	2.14e-27	2.97e-07	5.31e-22	1.06e-22	5.66e-26	3	3	rs139086128 0.01; rs1718860 0.276	0.0155881	7.01606e-17	2.13953e-31	3.39677e-08	6.2803e-26	7.42885e-25	7.18026e-30	Yes
LGALS1	22	38071614	38075813	Cis-Reg	5.93e-12	1.03e-09	2.43e-18	1.47e-06	9.33e-17	2.08e-25	4.47e-25	15	7	rs139136100 0.012; rs13058368 0.478
CCL15	17	34323475	34329084	Cis-Flank	1.31e-14	1.21e-20	7.64e-56	8.81e-42	3.39e-56	5.79e-58	6.44e-24	83	72	rs854624 0.044
RETN	19	7733929	7735340	Cis-Reg	0.0217504	0.120843	1.11e-22	0.000120595	4.25e-07	1.37e-18	1.94e-22	7	10	rs10401670 0.32; rs34124816 0.012	0.0347173	0.051677	9.85881e-23	0.000248963	4.77843e-07	6.74556e-18	7.1657e-22	Yes
CD48	1	160648535	160681641	CDS-regions	1.58e-53	4.2e-64	1.49e-22	3.76e-72	1.07e-42	1.91e-65	6.11e-22	6	5	rs2295615 0.168; rs149336642 0.016	3.72962e-05	3.98253e-12	2.25325e-12	2.15069e-11	6.93011e-13	6.68096e-17	1.24603e-15	Yes
IL6R	1	154377668	154441926	Cis-Flank	3.12e-92	4.78e-98	1.14e-41	3.64e-62	1.31e-101	1.63e-129	3.05e-21	104	96	rs12126142 0.337; rs12047973 0.216; rs1386821 0.225
EPCAM	2	47572296	47614740	CDS-regions	0.100063	0.00729495	5.76e-08	0.0167204	3.97e-06	1.71e-22	2.45e-20	3	6	2:49144591 0.01	0.0574079	0.00519529	4.8072e-09	0.0120581	2.74364e-07	4.01983e-23	2.69419e-21	Yes
TNFRSF10A	8	23047964	23082639	CDS-regions	1.26e-27	0.000162089	3.6e-14	9.29e-18	7.88e-37	3.44e-49	1.48e-18	3	6	rs6982233 0.16; rs184241321 0.022; 8:21962458 0.011; rs4557709 0.338; rs73222574 0.249	0.000277947	0.239645	1.43709e-19	3.64659e-10	1.29549e-17	6.51023e-25	9.91573e-26	Yes
ULBP2	6	150263135	150270371	Cis-Flank	5.23e-28	1.22e-26	1.35e-13	9.22e-30	8.01e-37	1.26e-47	4.63e-18	77	149	rs1951931 0.112; rs11964763 0.412; rs4343924 0.13	0.226561	0.260419	4.46478e-06	3.22824e-05	0.000124484	8.72826e-07	0.143001	Yes
MIA	19	41277552	41283395	Cis-Flank	1.44e-23	1.7e-21	7.6e-32	1.25e-53	5.36e-53	1.48e-56	1.36e-17	89	129	rs12609370 0.112	0.000453689	0.000640655	0.00414671	0.000200699	0.000156073	0.000871489	0.193612
CCL16	17	34303528	34308532	Cis-Reg	2.01e-66	6e-38	5.63e-24	1.36e-74	2.8e-89	3.19e-100	3.35e-17	21	15	rs112689088 0.148	1.19748e-05	0.000324303	0.096857	0.000210266	0.0028119	0.000846998	0.169399	Yes
IDUA	4	980784	998294	Cis-Flank	1.78e-25	3.67e-27	8.28e-09	1.74e-18	1.32e-27	6.61e-30	7.64e-17	342	365	rs11936407 0.231; rs59933999 0.274	0.000880901	0.000451565	6.94402e-06	0.00021619	9.82276e-06	2.2943e-06	6.57486e-07	Yes
CD70	19	6583193	6604114	Cis-Flank	3.88e-36	1.1e-42	2.48e-11	2.74e-51	1.23e-47	1.48e-52	8.19e-17	108	176	rs7254538 0.406; rs3837945 0.105; rs11085182 0.501
IL17RA	22	17565843	17596584	Cis-Reg	1.44e-43	8.42e-11	1.12e-37	1.57e-63	1.54e-57	1.04e-73	1.77e-16	27	50	rs4819959 0.486; rs2241044 0.424; rs2241046 0.22; rs879575 0.164; rs144322196 0.057; 22:17477147 0.028; rs142591902 0.031
CCL8	17	32646054	32648421	Cis-Flank	1.89e-17	3.06e-17	1.77e-42	4.17e-33	7.27e-33	1.44e-40	2.54e-16	36	49	rs3138036 0.099; rs74832623 0.048; rs12601658 0.234
SIRPA	20	1874812	1921238	Cis-Flank	3.79e-43	5.2e-31	1.48e-07	2.5e-45	4.56e-51	2.87e-57	1.17e-15	131	125	rs68087171 0.375; rs2254194 0.239
SCARB2	4	77079885	77155689	CDS-regions	4.41e-10	1.96e-12	2.31e-14	1.94e-07	1.47e-13	8.76e-20	4.69e-15	6	6	rs4859611 0.456	0.00921663	6.67936e-06	1.03101e-11	0.0100682	3.37621e-06	7.30622e-11	3.57112e-12	Yes
ADA	20	43248162	43280874	CDS-regions	0.00127374	0.00317619	4.08e-15	9.95e-08	2.8e-11	1.32e-13	6.46e-15	5	4	rs11555566 0.022
IL18R1	2	102927988	103015235	Cis-Flank	7.52e-73	2.75e-70	2.95e-16	5.77e-72	5.13e-81	2.39e-93	6.93e-15	77	108	rs917997 0.244; rs12999517 0.17	2.54981e-06	2.12697e-06	0.00188508	1.24842e-06	1.43693e-06	4.37697e-10	0.000557428	Yes
CNTN5	11	98891682	100229616	CDS-regions	8.11e-06	9.43e-08	1.11e-13	4.67e-10	3.39e-13	3.71e-17	7.3e-15	11	7	rs282486 0.083; rs7929307 0.424; rs36063616 0.093
AMBP	9	116822406	116840752	CDS-regions	0.000843565	3.93e-17	5.96e-11	4.09e-06	2.73e-06	1.17e-10	7.99e-15	8	1	rs201342994 0.013	0.000857861	6.01963e-18	1.66728e-11	3.16417e-06	1.4684e-06	6.3713e-12	5.95704e-18	Yes
CD48	1	160648535	160681641	Cis-Reg	3.09e-19	1.66e-10	6.66e-06	8.44e-24	1.85e-24	6.42e-34	1.03e-14	33	68	rs2295615 0.168; rs149336642 0.016
CCL24	7	75440982	75452674	Cis-Flank	2.75e-20	6.77e-20	6.78e-27	7.26e-20	1.58e-33	1.87e-34	5.72e-14	61	61	rs2024050 0.052; rs76312007 0.128; rs58160288 0.301; rs190360124 0.079
GPC5	13	92050860	93525935	Cis-Reg	2.91e-45	7.94e-45	7.63e-17	3.32e-35	5.34e-52	5.41e-55	6.3e-14	209	240	rs342706 0.336; rs9523330 0.288; rs187104426 0.021
MDGA1	6	37598454	37667082	Cis-Flank	4.88e-25	1.03e-29	4.93e-29	2.27e-37	3.79e-38	1.51e-49	1.11e-13	133	198	rs56343594 0.486; 6:37587208 0.03; 6:38971524 0.011; rs7745284 0.281
CTSZ	20	57570239	57582302	CDS-regions	0.328835	2.36e-12	4.05e-13	4.36e-05	1.39e-07	4.44e-14	1.69e-13	2	4		0.163609	8.81865e-13	2.23621e-13	4.18392e-05	4.94184e-09	3.68833e-14	7.06284e-14	Yes
SLAMF7	1	160708846	160724611	CDS-regions	8.39e-18	9.09e-16	6.48e-13	1.38e-19	2.11e-10	7.52e-28	1.86e-13	9	2	rs11581248 0.089; rs139821064 0.01	6.93634e-06	0.00111979	1.82551e-13	9.43652e-07	3.35112e-06	7.80825e-11	4.50522e-13	Yes
MSLN	16	810761	818865	Cis-Flank	4.49e-07	9.88e-05	4.38e-10	6.64e-11	9.31e-12	5.49e-18	3.05e-12	573	422	rs2235505 0.237; rs184581314 0.013
THBS2	6	169615874	169654139	Cis-Reg	3.24e-11	3.26e-17	2.75e-12	1.8e-16	2.29e-16	3.55e-22	4.03e-12	36	90	rs73041845 0.109; 6:168592892 0.01	0.00522969	0.0200152	0.0322388	0.0213031	0.0100558	0.0402954	0.815241
IDUA	4	980784	998294	CDS-regions	2.52e-21	5.7e-22	7.66e-15	4.19e-08	4.55e-14	8.43e-20	6.91e-12	11	18	rs11936407 0.231; rs59933999 0.274
ERBB2	17	37844166	37886679	Cis-Reg	6.1e-08	9.7e-07	2.52e-11	1.21e-16	2.44e-15	4.18e-17	7.19e-12	54	22	rs35542329 0.371	0.00325826	0.0178803	5.61877e-13	2.79839e-13	3.37226e-13	5.06502e-14	8.61314e-14	Yes
PRTN3	19	840959	848175	Cis-Flank	2.62e-10	3.02e-07	6.83e-12	1.29e-12	7.53e-14	1.32e-20	9.15e-12	457	390	rs2074638 0.379; rs55952682 0.195; rs351111 0.291
CD300LF	17	72690449	72709117	Cis-Flank	2.18e-14	1.43e-10	6.34e-29	9.23e-53	1.35e-27	3.38e-28	1.49e-11	94	86	rs10512597 0.181
CCL16	17	34303528	34308532	CDS-regions	2.99e-75	8.21e-19	2.42e-13	2.04e-76	2.23e-91	4.22e-91	1.64e-11	4	3	rs112689088 0.148
CD40	20	44746910	44758502	CDS-regions	2.87e-43	3.34e-44	8.63e-12	5.19e-44	3.4e-51	1.61e-57	4.41e-11	4	5	rs6032660 0.245; rs182282247 0.021	0.00101331	0.104513	1.71439e-07	6.22813e-05	5.51923e-06	2.49194e-09	4.11554e-09	Yes
SERPINA12	14	94953610	94984181	Cis-Reg	0.00130683	0.0142058	2.7e-15	1.58e-11	3.06e-12	8.26e-15	4.41e-11	19	17	rs17091005 0.19; rs7158068 0.269
OSCAR	19	54597932	54606000	Cis-Flank	8.38e-13	3.86e-10	6.54e-29	2.03e-24	5.3e-19	7.41e-22	5.55e-11	111	152	rs4806708 0.286; rs61742142 0.038; rs10415777 0.489	1.7973e-06	1.32791e-05	0.00029277	1.43932e-07	1.13842e-07	3.82186e-07	0.000712054	Yes
MPO	17	56347216	56358296	CDS-regions	7.44e-06	1.45e-19	7.44e-14	5.88e-12	2.43e-16	6.78e-19	1.72e-10	9	7	rs34097845 0.135; rs8178414 0.056; 17:56352981 0.018	7.73071e-06	8.12463e-14	2.35706e-11	2.05447e-07	9.47284e-14	4.00646e-17	4.41963e-13	Yes
IL18R1	2	102927988	103015235	Cis-Reg	7.59e-28	1.9e-24	2.22e-20	9.56e-42	3.36e-31	1.13e-42	2.8e-10	47	111	rs917997 0.244; rs12999517 0.17
SLAMF7	1	160708846	160724611	Cis-Reg	6.59e-14	2.28e-14	0.00907704	0.000109774	1.37e-08	2.25e-16	3.35e-10	18	38	rs11581248 0.089; rs139821064 0.01
MSLN	16	810761	818865	Cis-Reg	7.03e-22	6.62e-24	2.4e-08	5.05e-24	4.86e-24	5.77e-32	3.45e-10	59	25	rs2235505 0.237; rs184581314 0.013	0.00597021	9.17525e-05	8.40457e-07	3.92063e-05	1.4131e-06	3.88857e-10	1.19795e-09	Yes
CSTB	21	45192391	45196326	Cis-Flank	7.51e-42	1.31e-39	0.000432355	3.04e-22	2.04e-39	3.56e-48	3.52e-10	219	253	rs35285321 0.325	0.200533	0.243326	0.345097	0.447841	0.317439	0.1125	0.0766624
CA5A	16	87915151	87970135	Cis-Reg	2.37e-38	9.57e-25	0.000161738	8.28e-41	1.23e-41	1.89e-46	4.54e-10	67	114	rs72816308 0.193	0.0715599	0.0350249	0.0728998	0.0495344	0.032989	0.0185172	0.0224456
THBS2	6	169615874	169654139	Cis-Flank	1.42e-05	2.76e-06	2.76e-08	1.62e-11	5.49e-08	2.39e-13	6.21e-10	70	135	rs73041845 0.109; 6:168592892 0.01
IL1R2	2	102608305	102645006	Cis-Flank	1.33e-42	3.14e-42	3.63e-12	7.67e-26	3.31e-49	4.94e-63	6.83e-10	93	94	rs2310170 0.452	0.00245251	0.00155117	0.0417923	0.000100456	0.000940118	0.00104598	0.144221
SMOC2	6	168841830	169073984	Cis-Flank	1.16e-22	3.99e-22	5.77e-13	2.42e-10	9.57e-17	2.3e-22	2.52e-09	84	117	rs4708738 0.284; rs2609313 0.233	0.0454045	0.0690524	0.17361	0.0644914	0.151494	0.0988209	0.305532
CRTAM	11	122709207	122743347	Cis-Reg	5.8e-15	2.02e-12	2.36e-05	6.28e-08	5.09e-14	3.63e-19	2.99e-09	25	39	rs59230519 0.204; rs2370794 0.339	9.07628e-05	0.00114346	0.00066533	0.000318172	2.01316e-05	5.06477e-06	1.85868e-05	Yes
MMP3	11	102706531	102714534	Cis-Flank	7.16e-14	1.02e-14	0.000326738	9.25e-05	4.87e-13	1.25e-22	5.63e-09	26	38	rs602128 0.36
CPM	12	69235976	69365350	CDS-regions	0.000177482	6.74e-05	5.16e-09	5.79e-06	2.1e-09	4.8e-10	9.98e-09	5	5	rs142063414 0.011
CHIT1	1	203181954	203242769	CDS-regions	1.17e-14	7.48e-35	4.03e-06	3.27e-37	2.39e-24	5.22e-29	1.03e-08	6	5	rs150192398 0.136; rs201364457 0.077; rs72739570 0.182; rs17464408 0.286
CD70	19	6583193	6604114	Cis-Reg	5.18e-44	2.37e-56	3.47e-06	9.05e-49	4.48e-52	2.45e-53	1.36e-08	23	43	rs7254538 0.406; rs3837945 0.105; rs11085182 0.501	0.539298	0.286109	0.424446	0.488194	0.334537	0.0869467	0.207131
ERBB2	17	37844166	37886679	Cis-Flank	2.28e-05	2.19e-05	2.4e-08	1.61e-09	3.6e-08	4.55e-12	1.51e-08	246	158	rs35542329 0.371
GPC5	13	92050860	93525935	Cis-Flank	5.36e-47	9.79e-23	1.12e-11	1.38e-31	9.94e-55	4.55e-55	2.07e-08	105	92	rs342706 0.336; rs9523330 0.288; rs187104426 0.021	1.23187e-06	1.35956e-07	2.26129e-06	1.35486e-07	3.1466e-08	5.01312e-16	5.87057e-12	Yes
SMOC2	6	168841830	169073984	Cis-Reg	9.64e-15	1e-11	2e-13	8.69e-18	6.54e-21	2.63e-22	2.73e-08	140	189	rs4708738 0.284; rs2609313 0.233
MDGA1	6	37598454	37667082	Cis-Reg	2.69e-36	5.22e-47	6.73e-08	6.09e-29	2.35e-37	8.7e-53	3.27e-08	86	152	rs56343594 0.486; 6:37587208 0.03; 6:38971524 0.011; rs7745284 0.281	2.71431e-05	1.06196e-07	1.15131e-06	2.12245e-07	3.74922e-07	2.33078e-10	4.17155e-05	Yes
ADAM22	7	87563457	87832204	Cis-Reg	4.99e-20	1.85e-26	7.28e-14	2.17e-20	1.03e-27	3.21e-41	4.15e-08	60	65	rs6966166 0.439; rs1201839 0.439
NGF	1	115828538	115880857	CDS-regions	0.018224	0.00952576	2.19e-07	1.01e-07	9.21e-08	2.19e-09	5.22e-08	2	1
PVR	19	45147097	45166850	Cis-Flank	1.6e-34	3.93e-29	8.86e-15	4.03e-37	3.98e-44	2.08e-45	5.49e-08	152	122	rs59451830 0.229; rs846903 0.385
CNTN5	11	98891682	100229616	Cis-Reg	1.01e-20	6.88e-12	7.09e-16	3.2e-23	1.72e-25	2.77e-27	5.76e-08	216	312	rs282486 0.083; rs7929307 0.424; rs36063616 0.093	0.00120845	0.0310693	0.0150375	0.000324879	0.00056565	3.13111e-05	0.00321566	Yes
CCL23	17	34340095	34345005	Cis-Reg	0.0034942	0.00177545	1.98e-07	0.000307636	2.08e-06	5.79e-10	5.97e-08	18	17	rs712048 0.088; rs854686 0.225; rs854671 0.474
PRTG	15	55903743	56035288	CDS-regions	1.24e-13	4.95e-13	2.83e-07	2.43e-07	3.11e-16	7.32e-21	6.6e-08	10	8	rs10628094 0.341; rs71441408 0.242
CCL16	17	34303528	34308532	Cis-Flank	1.87e-20	7.7e-19	1.21e-05	2.33e-17	5.2e-21	4.11e-25	6.62e-08	81	63	rs112689088 0.148
CCL23	17	34340095	34345005	Cis-Flank	5.26e-11	9.45e-11	2.46e-11	2.41e-10	2.24e-15	4.96e-19	7.63e-08	91	83	rs712048 0.088; rs854686 0.225; rs854671 0.474	0.00506151	0.00390023	0.00012122	0.000810668	9.35214e-05	6.96554e-06	1.57799e-05	Yes
MMP7	11	102391238	102401484	Cis-Flank	0.00071685	0.000373728	5.94e-11	6.02e-15	1.24e-07	3.45e-11	8.33e-08	118	143	rs56857975 0.091; rs12285347 0.291	0.0594323	0.0567069	0.0801922	0.00680326	0.0340206	0.000798751	0.00438023
MSLN	16	810761	818865	CDS-regions	0.0060991	0.00172923	3.38e-06	2.89e-05	5.45e-05	1.89e-10	8.57e-08	25	5	rs2235505 0.237; rs184581314 0.013
LTBR	12	6484210	6500737	Cis-Reg	1.16e-21	6.66e-22	0.00356298	7.51e-06	7.93e-24	1.09e-31	1.35e-07	38	28	rs5796234 0.436	0.0630395	0.11167	0.00166414	0.0536402	0.00532077	3.95584e-05	5.4119e-06	Yes
TNFSF14	19	6661263	6670599	Cis-Flank	0.00332986	0.0473449	0.00198961	0.0049155	0.00101066	3.83e-08	1.4e-07	142	216	rs344560 0.066
SIGLEC1	20	3667616	3687775	CDS-regions	5.85e-05	1.9e-05	1.74e-07	8.18e-11	1.31e-10	4.05e-12	1.48e-07	22	21	rs1005885 0.083	0.163583	0.0273992	0.00199498	0.0702616	0.00260632	1.6941e-05	5.16909e-07	Yes
LAIR2	19	55009099	55021897	Cis-Reg	1.25e-11	7.89e-19	8.8e-17	1.56e-12	1.22e-15	2.76e-22	1.83e-07	14	26	rs73063845 0.081; rs148035216 0.044; rs73070113 0.062; rs59342471 0.124; rs146104402 0.013; rs10409178 0.064
PDCD1LG2	9	5510569	5571254	Cis-Flank	6.57e-22	5.74e-23	1.77e-05	1.7e-17	4e-24	2.87e-27	1.99e-07	148	177	rs2381282 0.455	0.00241769	0.00206447	0.005361	0.000146369	9.28198e-05	0.000205355	0.363613
ITGB5	3	124480794	124620265	Cis-Reg	0.000329637	0.000555283	2.37e-06	1.47e-09	7.31e-08	2.32e-10	2.14e-07	189	178	rs17282057 0.08
CHIT1	1	203181954	203242769	Cis-Reg	1.16e-25	2.19e-07	1.01e-11	9.77e-49	3.04e-41	8.25e-44	2.18e-07	60	92	rs150192398 0.136; rs201364457 0.077; rs72739570 0.182; rs17464408 0.286	0.400763	0.332754	0.225409	0.549026	0.487026	0.324546	0.163365
CHIT1	1	203181954	203242769	Cis-Flank	6.6e-15	1.48e-14	3.26e-17	1.8e-28	1.17e-27	5.39e-31	2.3e-07	157	184	rs150192398 0.136; rs201364457 0.077; rs72739570 0.182; rs17464408 0.286
TEK	9	27109138	27230173	Cis-Reg	0.0028692	0.0386977	1.41e-10	1.64e-07	5.66e-06	7.93e-11	2.3e-07	110	144
LRPAP1	4	3508102	3534286	Cis-Flank	1.33e-06	2.2e-06	1.8e-05	3.73e-06	7.75e-08	5.74e-13	3.03e-07	426	451	rs1054661 0.418	0.249289	0.244872	0.00842342	0.0701883	0.0298657	0.00154673	0.0173578
MMP7	11	102391238	102401484	Cis-Reg	0.000398734	1.65e-07	2.93e-07	9.61e-07	3.14e-06	2.52e-07	3.09e-07	11	11	rs56857975 0.091; rs12285347 0.291
ITGB5	3	124480794	124620265	Cis-Flank	0.000394963	0.00057293	6.47e-06	1.3e-06	2.24e-06	5.16e-10	3.16e-07	94	111	rs17282057 0.08
IL1RL1	2	102927961	102968497	Cis-Flank	3.03e-33	4.38e-33	7.22e-08	2.06e-28	4.14e-36	2.83e-45	3.34e-07	74	100	rs1420101 0.298; rs11676124 0.449
LGALS8	1	236681299	236716281	CDS-regions	4.25e-67	3.36e-66	5.86e-08	1.42e-68	6.92e-70	1.11e-90	3.55e-07	4	13	rs11807205 0.285
SFTPD	10	81697495	81742370	Cis-Reg	1.21e-13	5.48e-06	8.58e-14	1.88e-26	5.69e-27	1.93e-23	3.64e-07	35	38	rs721917 0.303; rs7084667 0.367
TEK	9	27109138	27230173	CDS-regions	0.000176351	3.83e-07	7.61e-11	3.21e-14	1.34e-12	4.38e-16	3.66e-07	13	13		3.47759e-05	3.31965e-07	2.36103e-11	4.42738e-16	5.92549e-14	2.88141e-20	2.92372e-07	Yes
CCL23	17	34340095	34345005	CDS-regions	0.00168469	0.00256015	1.05e-05	0.000175908	1.75e-07	1.33e-06	3.8e-07	4	3	rs712048 0.088; rs854686 0.225; rs854671 0.474
CEACAM5	19	42212503	42233718	CDS-regions	0.00225157	0.404982	0.00111301	0.00629769	0.000354909	1.06e-07	4.23e-07	4	5
FCRLB	1	161691352	161697933	Cis-Flank	3.08e-10	6.37e-08	8.69e-11	5.11e-19	7.66e-18	3.11e-19	4.51e-07	93	81	rs12040409 0.06	0.0077325	0.008999	0.0199711	0.00499015	0.00465184	0.00042252	0.00727595
OSCAR	19	54597932	54606000	Cis-Reg	1.96e-17	1.48e-14	6.3e-08	2.58e-12	3.97e-23	8.45e-17	4.6e-07	12	17	rs4806708 0.286; rs61742142 0.038; rs10415777 0.489
THBS2	6	169615874	169654139	CDS-regions	3.57e-07	2.46e-07	2.88e-10	3.92e-12	9.1e-12	4.23e-14	5.1e-07	10	26	rs73041845 0.109; 6:168592892 0.01
PRTN3	19	840959	848175	Cis-Reg	7.44e-19	6.01e-22	2.09e-10	2.76e-15	1.28e-20	7.4e-28	5.86e-07	17	35	rs2074638 0.379; rs55952682 0.195; rs351111 0.291	0.0155196	0.0402211	0.783865	0.0227973	0.0747007	0.0681246	0.616213
LRPAP1	4	3508102	3534286	CDS-regions	0.000107003	5e-05	6.44e-06	7.1e-05	1.38e-06	1.54e-11	5.92e-07	12	8	rs1054661 0.418
IL17RA	22	17565843	17596584	Cis-Flank	2.03e-37	7.18e-33	1.47e-33	9.86e-53	1.02e-53	1e-44	6e-07	52	101	rs4819959 0.486; rs2241044 0.424; rs2241046 0.22; rs879575 0.164; rs144322196 0.057; 22:17477147 0.028; rs142591902 0.031
CD6	11	60739151	60787849	Cis-Flank	2e-09	6.47e-08	8.87e-19	7.59e-38	5.53e-22	2.98e-27	6.73e-07	154	160	rs11230563 0.165	0.0224415	0.0736615	0.0105275	5.9663e-05	0.00386799	1.64095e-05	0.00244465	Yes
SERPINA12	14	94953610	94984181	Cis-Flank	4.75e-18	1.19e-15	1.9e-13	2.96e-29	2.62e-27	3.74e-26	6.81e-07	60	109	rs17091005 0.19; rs7158068 0.269	0.260503	0.262204	0.0350953	0.0249203	0.0729801	0.00309798	0.00190353
PRTN3	19	840959	848175	CDS-regions	2.18e-16	0.00736814	2.35e-07	7.86e-13	9.38e-19	2.01e-22	7.42e-07	6	5	rs2074638 0.379; rs55952682 0.195; rs351111 0.291
NRCAM	7	107788067	108097161	Cis-Reg	8.61e-11	3.39e-10	1.38e-06	5.87e-12	1.14e-12	4.46e-19	7.65e-07	215	347	rs17334792 0.473; rs145370708 0.295	0.0145299	0.0111052	0.0397445	0.0101187	0.0115147	0.00638065	0.0556781
TNFRSF10A	8	23047964	23082639	Cis-Reg	4.75e-33	2.15e-25	2.55e-06	7.18e-26	3.84e-41	7.35e-47	8.19e-07	26	24	rs6982233 0.16; rs184241321 0.022; 8:21962458 0.011; rs4557709 0.338; rs73222574 0.249
IL5RA	3	3108009	3168297	Cis-Flank	1.05e-05	0.000461459	0.00175158	5.72e-05	5e-06	6.84e-16	8.22e-07	44	74	rs1695315 0.302; rs3804790 0.124; rs183422392 0.019
IL17RA	22	17565843	17596584	CDS-regions	1.24e-70	5.92e-77	1.62e-27	3.42e-39	1.58e-72	9.48e-57	8.94e-07	11	11	rs4819959 0.486; rs2241044 0.424; rs2241046 0.22; rs879575 0.164; rs144322196 0.057; 22:17477147 0.028; rs142591902 0.031	0.00737504	0.144683	0.138796	0.0681537	0.120453	0.0381184	0.111211
ADAM22	7	87563457	87832204	Cis-Flank	6.91e-25	6.01e-24	5.27e-08	1.58e-19	2.18e-32	6e-37	9.74e-07	54	58	rs6966166 0.439; rs1201839 0.439
TNFRSF10A	8	23047964	23082639	Cis-Flank	6.16e-15	4.57e-15	3.18e-06	2.46e-15	1.5e-17	1.35e-21	1.02e-06	149	190	rs6982233 0.16; rs184241321 0.022; 8:21962458 0.011; rs4557709 0.338; rs73222574 0.249
GPNMB	7	23275585	23314727	Cis-Flank	4.55e-11	1.29e-08	1.61e-05	5.05e-10	3.65e-09	1.34e-14	1.05e-06	82	58	rs191297708 0.046; rs10227559 0.272
GPNMB	7	23275585	23314727	CDS-regions	2.63e-07	8.83e-30	7.6e-32	1.82e-21	1.94e-10	6.65e-23	1.11e-06	16	9	rs191297708 0.046; rs10227559 0.272	0.259503	0.0503019	1.07493e-06	0.0466888	0.0190196	5.8656e-05	4.53568e-06	Yes
XCL1	1	168545710	168551315	Cis-Flank	3.16e-17	1.02e-16	2.12e-06	1.83e-13	6.01e-18	1.93e-22	1.18e-06	31	54	rs34328291 0.149; rs61802612 0.039; rs28537856 0.032; rs16860872 0.158	0.0321971	0.0564055	0.00446718	0.0130471	0.0149331	0.00190729	0.0171695
PRTG	15	55903743	56035288	Cis-Reg	6.23e-21	1.27e-16	8.35e-14	2.54e-24	3.15e-27	6.11e-40	1.34e-06	64	100	rs10628094 0.341; rs71441408 0.242	0.019674	0.0227238	0.00651427	0.00186038	0.00358169	0.00110513	0.0494265
TNFRSF4	1	1146705	1149518	Cis-Reg	0.00189597	0.00191061	2.16e-07	0.000175126	5.07e-05	2.34e-07	1.39e-06	11	12		0.00113451	0.000738596	1.74399e-05	3.87867e-05	0.000125273	6.70063e-05	0.871151	Yes
CTSV	9	99791960	99801925	CDS-regions	0.0115001	0.018906	6.49e-06	0.000399382	4.28e-05	4.43e-07	1.49e-06	2	1	rs10759644 0.473	0.187352	0.487955	2.46369e-07	0.00118672	2.18064e-05	1.2217e-07	1.49621e-08	Yes
MSR1	8	15965386	16424999	CDS-regions	1.93e-07	0.0145585	0.000121601	2.19e-06	1.14e-06	8.9e-10	1.5e-06	10	2	rs17620811 0.071
TNFRSF19	13	24144508	24250243	Cis-Reg	2.3e-07	1.51e-10	0.000100954	1.53e-12	2.63e-11	8.72e-16	1.55e-06	88	176	rs35199493 0.316
OSCAR	19	54597932	54606000	CDS-regions	7.37e-14	3.58e-18	6.58e-21	1.57e-18	1.66e-22	4.18e-22	1.73e-06	3	3	rs4806708 0.286; rs61742142 0.038; rs10415777 0.489
TNFRSF19	13	24144508	24250243	Cis-Flank	6.85e-11	4.07e-10	0.000270619	1.11e-12	7.76e-14	1.54e-20	1.87e-06	61	95	rs35199493 0.316	0.000715331	0.000812065	0.00258369	0.000217684	0.000338257	1.70579e-05	0.000229794	Yes
SIRPA	20	1874812	1921238	Cis-Reg	6.98e-116	8.15e-44	3.13e-18	2.33e-29	6.48e-83	1.91e-92	2.16e-06	55	65	rs68087171 0.375; rs2254194 0.239
CD200	3	112051193	112081659	Cis-Reg	9.95e-06	3.28e-06	7.11e-06	1.03e-12	5.92e-08	6.01e-16	2.17e-06	31	49	rs7619941 0.147	0.00733232	0.00256946	0.00100003	0.000615531	0.00136437	1.22225e-05	3.36501e-05	Yes
IDUA	4	980784	998294	Cis-Reg	5.34e-27	3.35e-26	2.69e-13	2.08e-11	4.25e-20	1.15e-21	2.2e-06	45	48	rs11936407 0.231; rs59933999 0.274
ADAM23	2	207308262	207485854	Cis-Reg	1.82e-13	1.16e-10	6.61e-18	4.77e-23	1.18e-25	3.64e-26	2.24e-06	72	60	rs13429599 0.253; rs116360212 0.045; rs1448903 0.068; rs34088381 0.035
TNFRSF19	13	24144508	24250243	CDS-regions	8.4e-08	1.11e-06	3.12e-05	8.23e-08	5.93e-11	1.89e-15	2.41e-06	7	6	rs35199493 0.316
IL6R	1	154377668	154441926	Cis-Reg	6.08e-121	3.71e-100	2.93e-18	3.39e-121	1.78e-148	1.43e-152	2.68e-06	70	42	rs12126142 0.337; rs12047973 0.216; rs1386821 0.225	0.00966917	0.010567	0.17143	0.0153406	0.143877	0.0362283	0.275749
ADA	20	43248162	43280874	Cis-Reg	0.000316512	0.000220846	8.22e-07	6.82e-09	6.22e-06	7.56e-10	3.98e-06	34	33	rs11555566 0.022
IL1RL1	2	102927961	102968497	CDS-regions	5.19e-09	2.9e-05	5.95e-05	1.16e-13	5.13e-11	1.23e-16	4.01e-06	11	11	rs1420101 0.298; rs11676124 0.449
PLAU	10	75668934	75677255	CDS-regions	0.00708226	0.0157333	1.25e-05	0.0207682	5.74e-05	2.33e-06	4.01e-06	7	3		0.00888298	0.0194075	1.06113e-05	0.0242248	6.10899e-05	3.64186e-05	4.15733e-06	Yes
THBD	20	23026269	23030378	CDS-regions	3.08e-23	2.65e-27	5.8e-06	1.83e-23	9.73e-21	8.74e-36	4.61e-06	2	1	rs1042579 0.219	1.69819e-07	7.88499e-07	1.63545e-07	1.68598e-07	1.86756e-05	7.59822e-08	7.59822e-08	Yes
MIA	19	41277552	41283395	Cis-Reg	3.18e-46	5.5e-44	1.16e-31	1.92e-45	1.77e-50	1.02e-49	5.49e-06	13	20	rs12609370 0.112
CA5A	16	87915151	87970135	Cis-Flank	5.74e-13	2.16e-11	1.12e-05	2.7e-25	2.35e-17	1.21e-17	5.63e-06	325	416	rs72816308 0.193
CD48	1	160648535	160681641	Cis-Flank	5.15e-12	1.01e-10	3.22e-10	5.74e-14	5.14e-17	2.13e-18	5.66e-06	205	239	rs2295615 0.168; rs149336642 0.016
ITGB5	3	124480794	124620265	CDS-regions	0.000655795	1.4e-12	1.26e-05	1.72e-07	9.06e-07	4.75e-10	5.87e-06	15	8	rs17282057 0.08	0.161	0.174375	0.507541	0.236234	0.390138	0.101734	0.348774
IL1R2	2	102608305	102645006	Cis-Reg	2.35e-48	5.65e-47	1.07e-11	9.8e-26	1.76e-42	3.24e-55	6.06e-06	50	59	rs2310170 0.452
MSR1	8	15965386	16424999	Cis-Flank	0.06709	0.0646122	0.000431674	0.000873487	0.000592861	1.87e-06	6.11e-06	32	14	rs17620811 0.071
CRTAM	11	122709207	122743347	Cis-Flank	3.6e-13	9.7e-13	0.000363983	1.37e-05	9.93e-10	9.78e-15	6.12e-06	70	85	rs59230519 0.204; rs2370794 0.339
SCARB2	4	77079885	77155689	Cis-Flank	4.75e-11	6.88e-11	1.3e-05	2.14e-11	1.22e-12	1.18e-15	6.33e-06	72	98	rs4859611 0.456
CD27	12	6554032	6560884	Cis-Flank	1.11e-18	2.07e-15	3.47e-08	1.1e-23	2.11e-21	1.21e-29	6.57e-06	133	204	rs7970260 0.469; rs79655535 0.176; rs25680 0.149
CD200R1	3	112640055	112693969	Cis-Flank	1.07e-13	3.33e-08	1.17e-14	7.58e-11	1.72e-22	8.3e-21	6.84e-06	57	52	rs57891445 0.025; rs7611690 0.492
CHI3L1	1	203148058	203155877	Cis-Flank	3.28e-14	5.28e-12	9.7e-11	2.58e-12	1.45e-18	8.4e-22	7.26e-06	138	148	rs4950928 0.314
CD163	12	7623408	7656489	Cis-Flank	0.125953	0.287256	0.00128199	0.0040241	0.00562786	2.78e-07	1.01e-05	10	26
FURIN	15	91411821	91426688	Cis-Flank	0.180904	0.246685	0.000638431	0.00178526	0.00952069	6.09e-07	1.1e-05	135	175	15:91424615 0.016
SCARB2	4	77079885	77155689	Cis-Reg	3.73e-14	6.66e-15	1.78e-05	2.57e-11	1.02e-14	2.41e-17	1.12e-05	67	102	rs4859611 0.456
LTA	6	31539830	31542101	Cis-Flank	3.16e-07	6.04e-07	5.42e-08	4.33e-10	3.68e-08	4.97e-12	1.4e-05	224	332	rs2229092 0.028
TNFRSF10C	8	22941867	22974950	Cis-Flank	5.84e-08	4.31e-09	0.0001655	1.34e-05	4.51e-08	4.43e-15	1.41e-05	137	139	rs11784599 0.264	0.00200594	0.000597858	0.145621	0.0153551	0.00127941	0.00102248	0.0440202
LYPD3	19	43964938	43969812	Cis-Flank	0.00139872	0.00273766	0.0211819	8.8e-05	0.000396501	2.11e-08	1.95e-05	52	75	rs2599442 0.169	0.0336334	0.0352762	0.0029013	0.00409425	0.00999354	2.09694e-12	1.43937e-09	Yes
FCRL2	1	157715522	157746922	Cis-Reg	1.15e-38	1.3e-38	6.82e-05	6.97e-38	1.06e-45	4.04e-54	2.13e-05	43	35	rs112537702 0.156	0.00242887	0.00222166	0.718855	0.0205394	0.0143691	0.00542241	0.142906
PRTG	15	55903743	56035288	Cis-Flank	3.26e-20	1.46e-17	8.95e-17	1.29e-25	1.29e-29	6.09e-37	2.22e-05	49	62	rs10628094 0.341; rs71441408 0.242
CXCL1	4	74735109	74736959	Cis-Flank	7.54e-18	2.76e-18	1.83e-05	3.44e-21	2.3e-22	2.5e-25	2.32e-05	41	22	rs3117604 0.329	0.178638	0.155824	0.0610627	0.0631136	0.121138	0.0335391	0.0753968
CPE	4	166282345	166419472	Cis-Flank	1.64e-14	3.37e-14	1.09e-06	8.45e-11	8.35e-15	4.44e-17	2.37e-05	62	81	rs1550270 0.32	6.51535e-08	1.46787e-07	0.0565009	2.5285e-06	4.95061e-07	1.75398e-05	0.19252	Yes
SMPD1	11	6411660	6416228	CDS-regions	4.1e-20	2.74e-19	0.000153382	1.34e-16	2.25e-16	1.18e-23	2.48e-05	6	2	rs1050239 0.184	0.00027485	5.24517e-05	2.33957e-06	5.79591e-05	7.56272e-06	2.36903e-09	6.00463e-06	Yes
CXCL6	4	74702213	74714781	Cis-Reg	8.16e-24	3.54e-39	3.69e-06	2.42e-15	1.62e-27	1.37e-31	2.6e-05	13	7	rs16850073 0.439	0.229655	0.227887	0.0155224	0.0690559	0.14953	0.00598943	0.000777653
LGALS8	1	236681299	236716281	Cis-Reg	5.94e-67	3.26e-68	1.33e-08	1.27e-68	7.63e-68	4.99e-93	2.74e-05	52	164	rs11807205 0.285
MICA	6	31367560	31383092	Cis-Reg	2.2e-41	3.26e-36	1.36e-23	9.77e-55	5.22e-49	4.61e-61	2.79e-05	34	60	rs6928810 0.345; rs2524280 0.061; 6:31402666 0.246	0.035503	0.19855	6.53917e-08	0.000181035	4.97255e-06	2.71717e-08	4.8504e-07	Yes
IL10RB	21	34638662	34682492	Cis-Flank	1.81e-15	1.45e-18	8.8e-07	1.16e-11	5.29e-17	1.4e-19	2.84e-05	91	128	rs8178528 0.424
CD300LF	17	72690449	72709117	Cis-Reg	8.77e-78	4.38e-65	1.97e-07	6.96e-111	6.54e-100	1.32e-98	3.17e-05	28	31	rs10512597 0.181
KLK14	19	51580751	51587502	Cis-Reg	0.00136579	0.00124046	5.89e-05	8.8e-06	2.36e-05	4.04e-07	3.42e-05	9	14	rs2569491 0.3
IL12B	5	158741790	158757895	Cis-Flank	4.44e-21	4.23e-23	6.78e-12	6.9e-26	1.67e-29	1.42e-42	3.66e-05	33	27	rs10043720 0.268	0.447652	0.415922	0.0619747	0.259917	0.121412	0.061651	0.179277
SMPD1	11	6411660	6416228	Cis-Reg	4.56e-07	8.46e-05	0.00124704	4.93e-05	1.21e-08	3.94e-11	3.75e-05	16	12	rs1050239 0.184
PVR	19	45147097	45166850	CDS-regions	3.17e-39	3.78e-38	7.63e-08	9.44e-45	1.34e-23	6.56e-43	3.91e-05	7	2	rs59451830 0.229; rs846903 0.385
COL1A1	17	48260649	48278993	CDS-regions	0.00427678	2.63e-05	4.25e-05	0.000377765	0.000331246	8.21e-07	4.01e-05	22	14	rs149820303 0.012
CXCL1	4	74735109	74736959	Cis-Reg	6.36e-18	2.46e-18	8.91e-05	5.27e-17	4.93e-21	7.35e-24	4.06e-05	9	4	rs3117604 0.329
KLK14	19	51580751	51587502	Cis-Flank	2.42e-05	0.000400419	0.000745789	7.23e-07	1.93e-06	8.9e-11	4.34e-05	86	111	rs2569491 0.3	6.83428e-05	0.000182171	0.0322546	1.02687e-05	1.9051e-05	6.17542e-06	0.00483748	Yes
TNFSF13	17	7461608	7464925	Cis-Flank	6.42e-05	0.0004174	3.51e-06	0.000527898	6.3e-06	9.68e-08	4.5e-05	132	144		3.93254e-05	0.000207829	3.00344e-06	0.00031307	5.98482e-06	1.26149e-07	2.9744e-05	Yes
SELPLG	12	109016052	109027735	Cis-Flank	1e-06	1.05e-05	2.53e-40	2.12e-15	1.26e-19	2.95e-16	5.87e-05	155	174	rs147222609 0.028
IL15RA	10	5985601	6020150	CDS-regions	9.27e-22	4.19e-27	6.44e-05	1.33e-12	1.63e-24	3.59e-23	5.91e-05	13	11	rs3136630 0.277; rs144173272 0.011	9.93121e-06	1.02804e-11	0.00011833	0.000152826	1.71531e-06	2.47913e-07	1.30368e-06	Yes
DLL1	6	170591293	170615653	Cis-Flank	1.46e-05	5.75e-06	3.04e-08	1.06e-06	4.53e-07	1.14e-07	5.99e-05	148	169	rs11961095 0.04	0.00265381	0.00289843	0.00893054	0.002286	0.00375883	0.00118309	0.144099
MSR1	8	15965386	16424999	Cis-Reg	2.51e-08	0.00137859	9.76e-05	2.64e-09	8.29e-08	9.45e-13	6.78e-05	285	190	rs17620811 0.071	0.0387103	0.0373134	0.0126118	0.0265136	0.0126168	0.000339197	0.000552829
CD207	2	71057344	71062952	Cis-Flank	7.62e-09	2e-07	5.81e-05	2.5e-06	4.57e-08	5.87e-11	7.33e-05	41	87	rs17718987 0.305; rs189535281 0.037
MMP3	11	102706531	102714534	Cis-Reg	1.71e-19	1.99e-12	9.53e-05	5.3e-13	5.3e-21	8.75e-27	7.7e-05	13	23	rs602128 0.36	0.641124	0.452856	0.0914191	0.333394	0.154258	0.00791341	0.00244817
GPC1	2	241375087	241407495	Cis-Flank	3.33e-11	7.21e-10	7.86e-11	4.65e-19	8.22e-16	3.51e-18	8.95e-05	232	368	rs1126920 0.118
LGALS9	17	25956823	25976586	Cis-Flank	4.65e-33	3.24e-32	4.48e-05	3.17e-27	5.49e-34	3.91e-44	9.37e-05	80	109	rs4794979 0.199
SPON1	11	13984235	14289430	CDS-regions	0.0592458	0.30047	0.0033307	0.000238893	0.00743965	3.61e-06	9.61e-05	8	6	rs1969539 0.286
TFPI2	7	93514708	93520303	Cis-Flank	0.0234988	0.0186472	0.00552987	0.000333129	0.0011108	3.83e-07	0.000112214	45	40
TNFRSF11A	18	59992519	60058525	Cis-Flank	5.03e-17	1.95e-15	1.48e-06	1.91e-13	1.58e-18	3.09e-19	0.000117999	271	432	rs884205 0.493
COL1A1	17	48260649	48278993	Cis-Flank	0.0131413	0.0581294	0.025011	0.0359473	0.0272913	1.49e-06	0.000127917	243	212	rs149820303 0.012
CD207	2	71057344	71062952	CDS-regions	1.89e-21	3.43e-07	0.000617165	2.14e-07	1.7e-12	1.15e-15	0.000131142	13	9	rs17718987 0.305; rs189535281 0.037	0.000387243	0.000514476	0.0231422	0.00241632	0.00504394	3.18713e-06	0.000749814	Yes
CXCL6	4	74702213	74714781	Cis-Flank	8.01e-23	2.01e-16	0.000337942	9.7e-09	1.69e-24	1.71e-28	0.000131436	48	26	rs16850073 0.439
HSPB1	7	75931860	75933612	Cis-Reg	2.41e-30	1.8e-15	0.000945468	8.01e-34	2.41e-35	4.57e-39	0.000135442	18	9	rs2868371 0.301	0.52065	0.0235494	0.0438194	0.181747	0.185534	0.186768	0.0534088
RGMA	15	93578502	93632433	CDS-regions	1.78e-17	3.26e-15	0.00251436	1.93e-07	4.54e-20	1.08e-21	0.000138749	7	8	rs55816698 0.407
FOLR3	11	71825914	71850936	Cis-Flank	1.99e-18	1.06e-13	1.66e-15	1.43e-19	2.03e-22	1.6e-25	0.000168821	120	76	rs139130389 0.148
LRPAP1	4	3508102	3534286	Cis-Reg	2.82e-05	0.000707783	0.000246398	2.49e-05	3.47e-06	5.81e-08	0.000175916	50	57	rs1054661 0.418
TNFRSF10B	8	22877645	22926692	Cis-Flank	0.00012419	0.00110943	1.6e-05	6.46e-05	2.46e-05	3.14e-08	0.000183655	133	146	rs4871844 0.358; rs7841989 0.074
IGFBP7	4	57896938	57976551	Cis-Flank	3.26e-07	1.27e-06	3.12e-06	3.49e-06	9.76e-08	1.84e-11	0.000192283	63	109	rs139086128 0.01; rs1718860 0.276
CD207	2	71057344	71062952	Cis-Reg	5.41e-05	0.00734694	1.54e-05	0.000231634	6.87e-06	5.78e-07	0.000192835	19	21	rs17718987 0.305; rs189535281 0.037
IL16	15	81451915	81606399	Cis-Reg	0.000581308	8.49e-06	6.9e-19	6.38e-10	2.17e-07	4.14e-08	0.000199525	151	143	rs17875509 0.068	0.513805	0.400001	0.375909	0.378534	0.381891	0.388603	0.381492
KLK13	19	51559462	51568371	Cis-Flank	4.5e-06	3.51e-05	9.33e-06	2.95e-06	6.69e-07	1.24e-12	0.000204579	86	117	rs3760739 0.439	0.0161955	0.0218561	8.33087e-05	1.33568e-05	0.000690986	0.000395262	0.285699	Yes
SFTPD	10	81697495	81742370	Cis-Flank	1.07e-10	5.45e-12	1.68e-11	5.63e-28	5.13e-20	1.95e-22	0.000214045	28	47	rs721917 0.303; rs7084667 0.367
FRZB	2	183698001	183731890	Cis-Reg	0.000143825	0.00014802	4e-07	1e-06	9.01e-07	1.21e-10	0.0002151	32	22	rs288326 0.046; rs4427983 0.178
ITGB2	21	46305867	46351904	Cis-Flank	0.000208771	0.000403396	0.000654746	0.00135601	0.000158091	7.56e-07	0.00022552	412	472	rs760462 0.266
CHI3L1	1	203148058	203155877	Cis-Reg	9.61e-20	1.65e-23	1.02e-05	1.12e-09	9.24e-23	2.61e-24	0.000246874	17	30	rs4950928 0.314	1.41076e-06	3.8668e-06	0.0144317	0.000503302	1.8997e-05	5.26908e-05	0.103023	Yes
CTSC	11	88026759	88070955	Cis-Reg	4.62e-12	8.12e-12	1.33e-20	7.82e-26	9.85e-23	5.57e-24	0.000274056	51	110	rs11019400 0.095; rs217053 0.103
RGMA	15	93578502	93632433	Cis-Flank	9.93e-18	7.76e-19	6.13e-05	2.94e-09	2.9e-19	6.1e-24	0.000287255	118	192	rs55816698 0.407	3.66865e-06	8.24613e-05	0.0024472	0.000619468	1.62103e-05	1.77853e-05	0.00181064	Yes
GRN	17	42422453	42430470	Cis-Flank	0.000506216	0.00174365	0.00856411	0.0070327	0.000403039	1.28e-06	0.000301967	133	102	rs5848 0.364
TMPRSS5	11	113558271	113577095	Cis-Flank	3.9e-50	1.22e-54	1.06e-05	3.75e-21	2.2e-45	3.85e-43	0.000306786	26	44	rs7114195 0.319
HGF	7	81328321	81399754	CDS-regions	0.1511	1.56e-06	2.76e-08	0.00234161	3.83e-05	5.15e-06	0.000322081	8	3
GRN	17	42422453	42430470	Cis-Reg	0.000809273	5.66e-07	0.00300276	0.0044824	0.000103851	1.68e-05	0.000323966	13	17	rs5848 0.364	0.0399279	0.151487	0.949828	0.697662	0.1592	0.590467	0.521692
CXCL5	4	74861358	74864496	Cis-Reg	6.45e-26	9.77e-27	1.28e-07	4.95e-27	1.66e-21	1.7e-28	0.000337578	15	5	rs425535 0.092
CD160	1	145695797	145715614	Cis-Flank	4.4e-17	2.28e-17	0.00362102	7.11e-06	8.1e-19	4.84e-24	0.000339057	17	18	rs9728526 0.4	0.489526	0.468582	0.24882	0.202843	0.350903	0.0507884	0.202049
CLEC10A	17	6977855	6983626	Cis-Flank	3.07e-05	0.000300138	0.0120323	0.00067448	2.87e-05	3.53e-11	0.000346476	113	150	rs90951 0.392; rs920765 0.322
IL5RA	3	3108009	3168297	Cis-Reg	3.2e-11	5.44e-05	6.17e-07	3.3e-12	5.17e-13	4.61e-18	0.000380532	59	101	rs1695315 0.302; rs3804790 0.124; rs183422392 0.019	6.98821e-05	0.00361763	2.95421e-05	0.00072269	6.13426e-05	3.02019e-11	7.69737e-09	Yes
CD300C	17	72537246	72542282	Cis-Flank	2.7e-48	5.37e-49	7.01e-23	2.92e-74	1.3e-68	1.02e-74	0.000382712	74	103	rs58440339 0.152; rs2272111 0.192; rs147444017 0.061	0.0362488	0.0353796	0.033369	0.00269763	0.00571543	0.000218166	0.0303052
FCRL2	1	157715522	157746922	Cis-Flank	5.95e-40	1.28e-38	0.000182358	1.42e-24	5.79e-38	2.66e-40	0.000400545	20	16	rs112537702 0.156
MMP1	11	102660650	102668891	Cis-Flank	2.73e-06	2.94e-05	0.00199836	1.41e-05	4.86e-07	8.8e-11	0.000402713	32	53	rs471994 0.352; rs514921 0.27
TGFBR2	3	30647993	30735634	Cis-Flank	0.0116412	0.00750196	0.00188003	0.016163	0.005226	4.27e-06	0.000406361	105	113
TNFRSF11A	18	59992519	60058525	Cis-Reg	3.76e-22	2.37e-13	1.19e-07	2.29e-22	3.16e-27	5.77e-29	0.000409184	47	70	rs884205 0.493	1.36e-07	3.22084e-07	0.00892493	8.61975e-13	1.45104e-10	2.30037e-13	0.159414	Yes
ASAH2	10	51942537	52008370	Cis-Flank	5.09e-11	3.61e-10	2.45e-08	3.52e-09	4.77e-13	2.78e-12	0.000417299	37	40	rs2043616 0.468; rs146075547 0.016; rs7067773 0.035; rs10824201 0.354
GRN	17	42422453	42430470	CDS-regions	0.000298531	2.11e-05	0.000126817	0.000203421	5.59e-06	8.12e-05	0.000436672	8	3	rs5848 0.364
CD200	3	112051193	112081659	Cis-Flank	4.64e-06	6.82e-06	2.76e-05	0.000199916	4.08e-06	2.11e-08	0.000464759	39	100	rs7619941 0.147
FLRT2	14	85996487	86120770	Cis-Reg	1.74e-26	9.94e-18	0.0272123	2.29e-19	6.41e-24	4.25e-32	0.000467286	103	201	rs11291824 0.169; rs12881773 0.115	0.0853146	0.082113	0.362426	0.0226401	0.0420179	0.0606298	0.0854779
SPOCK1	5	136310986	136934068	Cis-Flank	0.0110362	0.00405191	0.0651018	0.183037	0.0190468	3.68e-07	0.000475115	113	117
IL1RL1	2	102927961	102968497	Cis-Reg	1.13e-46	1.46e-50	2.55e-06	1.35e-23	7.97e-49	2.51e-61	0.000486258	26	64	rs1420101 0.298; rs11676124 0.449	0.127479	0.0448896	0.00729232	0.0169551	0.0419371	0.00113682	0.0573526
WFIKKN1	16	679238	684116	Cis-Flank	1.4e-10	2.72e-11	0.00101985	5.02e-17	7.74e-13	5.47e-20	0.000531862	568	410	rs55798945 0.294	0.00115988	0.000828152	0.306723	0.00071075	0.000986445	1.66354e-05	0.0453211	Yes
NAAA	4	76834809	76862204	Cis-Reg	2.18e-37	4.96e-36	0.000639222	1.12e-36	2.97e-41	1.57e-40	0.000543897	48	43	rs112197434 0.304; rs11490704 0.442	0.743975	0.46751	0.117199	0.363139	0.124871	0.207263	0.0918352
CCL24	7	75440982	75452674	Cis-Reg	3.69e-26	6.17e-22	3.26e-10	3.93e-39	7.37e-38	2.57e-34	0.000547441	10	19	rs2024050 0.052; rs76312007 0.128; rs58160288 0.301; rs190360124 0.079	0.00592601	0.0325959	0.386952	0.0102167	0.012599	0.00470709	0.123372
RETN	19	7733929	7735340	Cis-Flank	4.61e-05	0.000147782	8.02e-05	3.74e-07	2.65e-06	2.47e-06	0.00055931	147	247	rs10401670 0.32; rs34124816 0.012
GPC1	2	241375087	241407495	Cis-Reg	1.18e-14	6.38e-10	1.61e-12	3.44e-19	1.46e-19	7.93e-19	0.000571693	55	99	rs1126920 0.118
ANPEP	15	90328119	90358633	Cis-Flank	8.53e-11	1.74e-10	9.16e-13	4.95e-19	1.37e-13	4.93e-13	0.000578758	99	139	rs1042499 0.082; rs28698386 0.439
CD200	3	112051193	112081659	CDS-regions	0.000234015	8.77e-05	0.0020827	9.73e-06	2.5e-05	1.02e-08	0.000606133	3	4	rs7619941 0.147
MMP3	11	102706531	102714534	CDS-regions	1.9e-19	2.05e-16	0.00774741	2.2e-17	6.32e-23	4.42e-26	0.000611317	8	6	rs602128 0.36
IL16	15	81451915	81606399	Cis-Flank	6.55e-06	4.54e-06	3.8e-17	7.22e-17	5.12e-14	2.03e-14	0.000617137	68	77	rs17875509 0.068
ADAM8	10	135075906	135090372	Cis-Flank	3.05e-07	5.71e-13	9.54e-24	2.31e-24	4.4e-24	1.07e-21	0.000617694	400	392	rs5789159 0.049
PDCD1LG2	9	5510569	5571254	Cis-Reg	2.88e-09	3.16e-25	0.000151814	3.64e-10	3.23e-10	2.16e-14	0.000695197	31	45	rs2381282 0.455
NECTIN4	1	161040784	161059389	Cis-Reg	0.000154032	0.00397525	0.00734499	4.33e-05	7.43e-05	8.5e-07	0.000701794	45	22	rs35434391 0.088
VSIG2	11	124617367	124622134	Cis-Flank	1.31e-11	5.2e-12	7.66e-05	2.37e-09	3.3e-12	3.01e-15	0.000747546	82	51	rs2075713 0.212	0.0565422	0.0518109	0.00150764	0.0494523	0.00138249	0.000447261	0.00248185
MICA	6	31367560	31383092	Cis-Flank	2.26e-41	9.2e-38	2.41e-26	1.2e-44	3.09e-50	5.52e-43	0.000760396	147	506	rs6928810 0.345; rs2524280 0.061; 6:31402666 0.246
CXCL1	4	74735109	74736959	CDS-regions	1.21e-16	1.29e-15	0.00117723	1.97e-18	1.51e-19	5.25e-21	0.000762949	4	2	rs3117604 0.329
GDF15	19	18485540	18499986	Cis-Reg	1.84e-07	4.04e-06	0.000299024	1.36e-09	1.76e-08	8.71e-11	0.000763228	18	33	rs74180880 0.146
AXL	19	41725107	41767671	Cis-Reg	1.89e-05	0.00209746	0.00033138	9.73e-05	2.69e-06	8.26e-07	0.000862443	19	34
HSPG2	1	22148737	22263790	CDS-regions	1.51e-13	5.07e-13	0.0690103	3.34e-10	7.4e-11	1.69e-12	0.000867692	69	61	rs4654770 0.196	0.0108149	0.0587566	0.680136	0.227604	0.148731	0.142265	0.637695
TNFRSF10C	8	22941867	22974950	Cis-Reg	5.64e-08	4.94e-09	0.00288824	8.71e-06	1.61e-10	1.09e-14	0.000899274	26	30	rs11784599 0.264
IL10RB	21	34638662	34682492	Cis-Reg	3.59e-37	8.58e-35	0.00011458	2.15e-14	3.47e-35	1.92e-42	0.000902073	31	48	rs8178528 0.424	0.0316654	0.0927941	0.250774	0.2831	0.040188	0.130992	0.442435
CD200R1	3	112640055	112693969	CDS-regions	3.31e-19	3.13e-21	1.6e-34	1.16e-36	1.12e-36	1.02e-40	0.000902076	4	10	rs57891445 0.025; rs7611690 0.492
NRCAM	7	107788067	108097161	Cis-Flank	1.07e-13	1.42e-11	0.000251661	2.55e-15	7.17e-16	2.26e-18	0.000941624	135	175	rs17334792 0.473; rs145370708 0.295
FRZB	2	183698001	183731890	Cis-Flank	0.00015325	0.000202246	5.58e-05	0.00194644	8.91e-06	3.71e-09	0.000962822	32	26	rs288326 0.046; rs4427983 0.178
CD244	1	160799949	160832645	Cis-Reg	6.36e-12	1.61e-11	0.0011594	4.66e-08	1.04e-11	4.39e-19	0.000962972	32	44	rs1319651 0.447	0.344706	0.401219	0.0946295	0.434525	0.161837	0.0149818	0.0213855
NAAA	4	76834809	76862204	Cis-Flank	1.4e-23	2.11e-24	0.000226483	1.17e-23	4.04e-29	1.56e-30	0.000977631	31	29	rs112197434 0.304; rs11490704 0.442
LY9	1	160765863	160798051	Cis-Reg	8.49e-19	8.71e-14	1.04e-47	2.35e-28	3.99e-25	4.18e-28	0.000978409	24	31	rs183360985 0.037; rs474918 0.273
CD40	20	44746910	44758502	Cis-Flank	5.23e-44	7.82e-41	0.000566814	8.72e-35	2.24e-36	2.28e-33	0.000989507	166	139	rs6032660 0.245; rs182282247 0.021
TLR3	4	186990305	187009223	Cis-Flank	2.33e-34	5.91e-31	6e-13	8.5e-37	4.62e-43	5.37e-36	0.00101008	32	44	rs35103715 0.363; rs3775296 0.145
ACVRL1	12	52300691	52317145	CDS-regions	0.00384617	0.00467164	5.58e-13	1.1e-06	1.29e-05	5.5e-07	0.00105263	2	5	rs2277382 0.065; rs2277381 0.113
CD244	1	160799949	160832645	CDS-regions	3.89e-13	6e-13	0.00519287	8.25e-06	4.27e-08	4.04e-18	0.00108703	2	1	rs1319651 0.447
WISP1	8	134203281	134242587	Cis-Flank	2.37e-20	1.66e-20	9.97e-06	1.3e-13	1.92e-19	1.28e-15	0.00111645	166	213	rs2739145 0.299; rs16904845 0.361	0.000296244	0.000607153	0.0319931	7.62596e-06	9.32626e-05	4.29082e-07	0.0161266	Yes
SULT1A1	16	28616516	28634946	Cis-Reg	2.12e-05	0.000286631	0.000125172	2.03e-06	8.9e-07	1.1e-09	0.00111656	16	28	rs138534121 0.074	0.0100598	0.0580432	0.0125608	0.00296978	0.00271065	4.45929e-05	0.00026527
PVR	19	45147097	45166850	Cis-Reg	5.98e-46	1.26e-44	1.04e-09	1.85e-50	2.11e-56	8.62e-54	0.00114236	32	22	rs59451830 0.229; rs846903 0.385	0.0136249	0.180064	0.922566	0.0893894	0.283639	0.167839	0.689061
CXCL16	17	4636820	4643217	Cis-Flank	1.86e-05	1.71e-05	0.00993405	1.94e-05	1.37e-05	2.05e-06	0.00117887	118	115		6.4228e-06	1.38146e-05	0.0243462	5.05603e-06	6.56504e-06	1.08096e-06	0.0119864	Yes
CCL3	17	34415601	34417515	CDS-regions	9.59e-08	5.8e-08	0.00255338	8.43e-08	3.89e-08	1.27e-10	0.00118923	1	1	rs1619526 0.247
ICOSLG	21	45642873	45660849	Cis-Flank	1.43e-11	3.09e-12	1.05e-07	8.68e-08	1.67e-12	1.35e-13	0.00120417	408	436	rs2847224 0.422; rs4818888 0.24
LGALS8	1	236681299	236716281	Cis-Flank	1.96e-75	1.4e-68	8.18e-07	7.17e-81	1.28e-82	5.48e-95	0.00121839	33	83	rs11807205 0.285	0.029094	0.0145208	0.108659	0.00291499	0.0336253	0.000499169	0.373516
NECTIN4	1	161040784	161059389	CDS-regions	2.24e-12	5.76e-18	0.000127154	7.25e-16	8.67e-13	9.85e-19	0.00122104	8	4	rs35434391 0.088	0.0438295	0.000606584	0.00229055	0.0165895	0.00570932	2.40956e-05	0.000777453	Yes
PGLYRP1	19	46522410	46526323	Cis-Reg	1.46e-13	1.37e-13	0.0471316	2.4e-14	2.09e-15	6.52e-16	0.00124538	10	6	rs2041992 0.26	0.606094	0.585022	0.48033	0.483889	0.623344	0.204567	0.0962393
SCARF2	22	20779104	20792113	Cis-Flank	1.09e-19	3.73e-20	0.00146649	2.26e-26	1.3e-24	3.33e-28	0.00125823	98	121	rs9610955 0.125
CD6	11	60739151	60787849	Cis-Reg	7.08e-20	1.24e-18	7.85e-10	2.38e-31	3.06e-29	1.42e-24	0.00131865	55	62	rs11230563 0.165
LTA	6	31539830	31542101	Cis-Reg	9.37e-08	3.8e-07	0.000906339	5.05e-07	1.78e-11	1.39e-10	0.00147773	9	10	rs2229092 0.028
HSPB1	7	75931860	75933612	Cis-Flank	2.42e-22	1.21e-22	5.59e-06	1.63e-22	3.93e-23	2.75e-28	0.00154853	122	67	rs2868371 0.301
CLEC1B	12	10138240	10166023	CDS-regions	1.58e-12	0.000225577	0.00467299	1.08e-06	4.36e-12	9.25e-16	0.00156854	6	3	rs544605 0.265	0.0181642	0.298216	0.0133285	0.113188	0.00234814	0.0419143	0.009058
SIGLEC9	19	51628164	51639908	Cis-Flank	2.26e-17	8.34e-13	8.43e-06	1.02e-12	4.56e-17	1.82e-13	0.00165088	79	84	rs2673908 0.43
PON3	7	94989255	95025680	Cis-Flank	5.46e-09	4.82e-09	1.5e-05	3.24e-06	1.01e-10	6.39e-12	0.00171834	26	55	rs149867961 0.028; rs1859121 0.498
SPON1	11	13984235	14289430	Cis-Reg	8.23e-09	1.5e-09	0.000635415	2.84e-11	1.62e-08	1.4e-12	0.00180682	97	176	rs1969539 0.286	0.0255891	0.0373249	0.206324	0.00495275	0.00798659	0.00139863	0.0495979
TFPI	2	188328956	188430487	Cis-Reg	1.07e-31	2.09e-32	0.00333319	1.06e-23	2.06e-26	1.06e-27	0.00183494	100	57	rs12104503 0.261; rs2058669 0.288
CST5	20	23856571	23860387	Cis-Flank	2.47e-10	8.23e-10	9.95e-05	1.51e-06	1.22e-10	2.45e-11	0.00185418	8	22	rs4813509 0.532
MICA	6	31367560	31383092	CDS-regions	1.17e-45	6.05e-44	2.4e-08	3.75e-30	2.55e-49	2.47e-47	0.00186202	8	18	rs6928810 0.345; rs2524280 0.061; 6:31402666 0.246
NAAA	4	76834809	76862204	CDS-regions	3.17e-32	4.13e-31	0.00776061	4.8e-36	3.03e-39	2.16e-39	0.00200782	8	5	rs112197434 0.304; rs11490704 0.442
ASAH2	10	51942537	52008370	Cis-Reg	1.7e-19	1.96e-16	2.31e-11	1.31e-11	7.13e-19	2.17e-20	0.0021659	11	14	rs2043616 0.468; rs146075547 0.016; rs7067773 0.035; rs10824201 0.354	0.00439242	0.00460239	0.153919	0.0128845	0.0355901	0.00190433	0.611808
SPON1	11	13984235	14289430	Cis-Flank	1.46e-06	1.08e-05	0.00171617	1.71e-06	4.44e-07	1.59e-08	0.00219222	70	71	rs1969539 0.286
DNER	2	230222344	230579274	Cis-Reg	1.84e-05	0.0108253	0.0164494	0.00297777	8.54e-05	3.94e-07	0.00222569	137	178
KDR	4	55944643	55991756	Cis-Reg	1.9e-05	0.00110192	0.0446009	5.39e-05	1.08e-05	8.76e-09	0.00223425	26	26	rs34231037 0.044
DDR1	6	30844197	30867933	CDS-regions	1.56e-21	2.66e-23	0.00357803	3.69e-23	4.07e-25	1.82e-25	0.00226197	11	9	rs3132574 0.461; rs2524236 0.341; rs77226840 0.044
CA5A	16	87915151	87970135	CDS-regions	2.71e-37	5.37e-36	0.0112458	4.55e-38	5.82e-41	3.11e-42	0.00235861	7	4	rs72816308 0.193
FLRT2	14	85996487	86120770	Cis-Flank	5.48e-05	0.0014208	0.00472306	0.000222048	2.27e-05	2.57e-06	0.00250496	40	45	rs11291824 0.169; rs12881773 0.115
SCAMP3	1	155225769	155232221	Cis-Reg	6.46e-05	6.14e-05	0.00592658	5.59e-05	1.24e-06	3.78e-07	0.00254303	13	8
SPOCK1	5	136310986	136934068	Cis-Reg	0.0449604	0.0086807	0.107209	0.253489	0.0547359	4.57e-06	0.00257951	286	343
ACP5	19	11685474	11689823	Cis-Flank	2.16e-11	4.87e-11	0.00401423	7.45e-17	2.44e-08	1.63e-16	0.00262508	125	58	rs79525531 0.15
IL2RA	10	6052651	6104288	Cis-Reg	6.84e-31	2.26e-19	7.63e-07	2.24e-45	4.07e-42	4.1e-41	0.00263989	67	93	rs12722497 0.065; rs12722588 0.143; rs72650666 0.026	9.33999e-05	0.000287498	0.072899	0.00169377	0.000141718	0.00340007	0.401838
MMP10	11	102641233	102651359	Cis-Flank	2.12e-05	4.41e-05	0.00153246	0.00169987	1.19e-05	2.17e-06	0.00264741	33	54	rs486055 0.134; rs17860955 0.022
LTBR	12	6484210	6500737	Cis-Flank	8.5e-10	4.16e-10	3.4e-05	4.08e-08	6.46e-11	5.71e-17	0.00272036	179	212	rs5796234 0.436
AXL	19	41725107	41767671	CDS-regions	2.38e-06	6.5e-06	0.000376823	1.34e-05	8.4e-10	2.25e-07	0.00286202	8	5		8.68821e-07	2.18593e-06	0.000206873	4.17833e-06	1.50521e-10	2.66757e-07	0.00401892	Yes
WFIKKN1	16	679238	684116	CDS-regions	3.42e-06	1.77e-10	0.0100813	2.4e-11	1.23e-07	1.93e-12	0.00295276	6	3	rs55798945 0.294
FCRL2	1	157715522	157746922	CDS-regions	5.89e-36	3.1e-35	0.00185881	5.56e-35	1.22e-40	1.7e-48	0.00302714	4	8	rs112537702 0.156
F2R	5	76011867	76031606	Cis-Flank	1.48e-11	1.13e-10	0.00326695	3.5e-09	4.24e-12	1.24e-15	0.00318072	58	96	rs2432189 0.452	0.000188468	0.000138828	0.0197451	0.000616436	8.37025e-05	0.000302197	0.0462989
STAMBP	2	74056042	74100786	CDS-regions	1.27e-05	2.31e-05	7.49e-06	2.57e-06	6.89e-07	1.05e-06	0.00331186	2	4
NECTIN4	1	161040784	161059389	Cis-Flank	1.32e-05	6.89e-06	0.00722627	3.24e-06	5.05e-06	1.87e-06	0.00332862	154	94	rs35434391 0.088
ANPEP	15	90328119	90358633	Cis-Reg	5.42e-16	2.62e-12	4.22e-14	5.08e-17	3.57e-22	2.49e-25	0.00351848	37	58	rs1042499 0.082; rs28698386 0.439	1.77285e-05	9.62052e-07	0.0014109	1.91432e-06	4.96177e-06	2.12471e-10	0.198538	Yes
ERBB2	17	37844166	37886679	CDS-regions	9.76e-06	8.21e-06	0.00335885	1.1e-06	2.46e-06	2.71e-07	0.00355878	11	5	rs35542329 0.371
CTSD	11	1773981	1785803	CDS-regions	3.34e-06	1.44e-06	1.41e-06	3.23e-06	2.31e-06	4.96e-08	0.00356497	6	5	rs56227787 0.238
TNR	1	175284329	175712906	Cis-Flank	0.00287031	0.00473065	0.124239	3.4e-05	0.00100111	2.73e-06	0.0036233	133	114	rs2235256 0.473
FCRLB	1	161691352	161697933	Cis-Reg	6.98e-11	4.38e-12	9.61e-05	4.3e-16	4.59e-12	2.07e-10	0.00386056	21	22	rs12040409 0.06
MMP12	11	102733466	102745764	Cis-Flank	6.87e-26	3.47e-25	0.000131421	1.4e-29	3.35e-31	6.01e-32	0.00387388	24	35	rs2005108 0.159
LAIR2	19	55009099	55021897	Cis-Flank	1.3e-21	1.27e-13	3.21e-11	4.86e-30	8.2e-32	1.84e-34	0.00395035	117	192	rs73063845 0.081; rs148035216 0.044; rs73070113 0.062; rs59342471 0.124; rs146104402 0.013; rs10409178 0.064	0.127501	0.189442	0.0159806	0.00925134	0.0190314	0.00065621	0.0248378
ACVRL1	12	52300691	52317145	Cis-Flank	4.45e-06	1.22e-05	1.61e-06	7.55e-16	5.41e-13	7.96e-11	0.00397396	201	162	rs2277382 0.065; rs2277381 0.113
VEGFA	6	43737920	43754224	Cis-Flank	4.21e-05	0.00182705	0.000211	6.68e-06	1.01e-05	1.58e-07	0.00398896	150	153	rs6921438 0.415	0.349147	0.163341	0.20276	0.283618	0.430046	0.0771619	0.106908
LAYN	11	111411004	111432470	Cis-Flank	1.73e-31	5.76e-34	1.11e-06	3.58e-58	1.22e-39	1.08e-42	0.0040541	100	51	11:111391081 0.067; rs4581484 0.307
CD4	12	6896023	6929974	Cis-Reg	0.000191819	2.48e-05	0.0121058	0.0029682	0.000109703	1.75e-07	0.00405554	25	51	rs73053728 0.216	0.222179	0.216157	0.0592654	0.0656694	0.0784425	0.0305191	0.239956
MPO	17	56347216	56358296	Cis-Flank	1.63e-06	6.8e-06	1.91e-05	1.12e-08	6.21e-08	5.36e-08	0.00413427	132	148	rs34097845 0.135; rs8178414 0.056; 17:56352981 0.018
VWC2	7	49813256	49961546	CDS-regions	1.15e-20	1.61e-06	0.0093095	3.2e-06	3.99e-13	4.24e-32	0.00423948	9	1	rs481076 0.428; rs886614 0.424	0.00960556	0.0085439	0.0318339	0.00968504	0.123471	0.00718968	0.00159617
IL1R1	2	102681003	102796334	Cis-Flank	0.000202728	0.00031924	0.280242	0.000707902	0.000142885	4.06e-12	0.00441697	132	126	rs1004548 0.487
CLEC1B	12	10138240	10166023	Cis-Reg	1.25e-07	1.15e-05	0.0056578	8.59e-13	7.25e-10	1.98e-11	0.00449888	36	36	rs544605 0.265
IGFBP7	4	57896938	57976551	Cis-Reg	2.75e-05	3.06e-05	0.000600994	9.13e-05	2.35e-05	9.94e-07	0.00470991	49	162	rs139086128 0.01; rs1718860 0.276
IL1R1	2	102681003	102796334	Cis-Reg	1.2e-06	1.15e-06	0.0453221	1.6e-05	9.26e-07	4.62e-15	0.00485738	147	156	rs1004548 0.487	0.370957	0.361694	0.176118	0.171978	0.168583	0.000936656	0.00748019
WISP1	8	134203281	134242587	Cis-Reg	6.32e-13	9.43e-11	3.48e-08	7.09e-19	1.87e-16	1.03e-17	0.00495805	49	85	rs2739145 0.299; rs16904845 0.361
VSIG2	11	124617367	124622134	Cis-Reg	8.32e-11	5.07e-11	0.0104415	6.22e-11	1.45e-11	2.1e-13	0.00512261	6	4	rs2075713 0.212
SULT1A1	16	28616516	28634946	Cis-Flank	0.000135328	0.000104167	0.00372031	0.00098917	1.09e-05	1.2e-06	0.00526194	40	53	rs138534121 0.074
DLK1	14	101192041	101204561	Cis-Flank	3.47e-22	2.22e-20	8.74e-06	5.12e-16	1.81e-22	8.08e-21	0.00526782	198	214	rs12881545 0.44	0.000250673	0.000458001	0.214634	0.000294458	0.00147496	4.48847e-06	0.15673	Yes
PON3	7	94989255	95025680	CDS-regions	4.38e-08	1.51e-08	0.431335	0.0188774	5.91e-08	6.37e-08	0.00538027	2	5	rs149867961 0.028; rs1859121 0.498
CTSD	11	1773981	1785803	Cis-Flank	6.29e-14	8.85e-12	3.25e-07	2.05e-15	6.61e-17	1.62e-17	0.00540009	229	309	rs56227787 0.238	0.000627839	0.000936651	0.0682581	0.00131812	0.000922652	0.000274519	0.0322986
TNFRSF10B	8	22877645	22926692	Cis-Reg	7.09e-05	0.00115022	0.00014449	5.62e-11	1.37e-06	1.82e-11	0.00547843	57	72	rs4871844 0.358; rs7841989 0.074
THBD	20	23026269	23030378	Cis-Flank	3.13e-07	4.88e-10	0.00234079	5.27e-06	2.52e-07	1.91e-14	0.0056636	99	86	rs1042579 0.219
TGFB1	19	41807491	41859816	Cis-Flank	0.000745232	1.94e-06	0.00120301	0.000539091	0.000183763	3.56e-05	0.00566574	140	136	rs1800472 0.042
CCL4	17	34430982	34433014	Cis-Flank	3.75e-06	5.12e-06	0.0196014	1.86e-07	1.19e-06	3.65e-08	0.00569029	99	112	rs916841 0.507	0.001411	0.00132319	0.395808	0.00196218	0.0018724	0.00111695	0.233609
BOC	3	112929849	113006306	Cis-Flank	3.71e-08	1.21e-07	0.000145044	2.87e-06	4.88e-08	1.02e-07	0.00583552	59	75	rs11717833 0.309	0.0864573	0.0423387	0.0388459	0.0770044	0.0992729	0.0437209	0.16423
MATN3	2	20191871	20212455	Cis-Reg	4.48e-12	1.58e-09	0.00146898	8.35e-07	4.04e-12	8.16e-18	0.00585595	18	19	rs10178256 0.483	0.0629715	0.14831	0.290282	0.108551	0.0765286	0.053559	0.141315
TGFB1	19	41807491	41859816	Cis-Reg	3.51e-07	3.04e-08	5.02e-05	6.46e-10	9.08e-08	1.75e-09	0.00599844	44	35	rs1800472 0.042
RET	10	43572474	43625799	Cis-Flank	0.000222332	0.000515478	0.0037614	1.33e-05	1.92e-05	4.22e-06	0.00624532	186	202	rs2796561 0.281; rs2565203 0.263
TFPI	2	188328956	188430487	Cis-Flank	1.47e-31	6.35e-32	0.0162215	6.79e-32	1.03e-33	2.06e-29	0.00640525	78	49	rs12104503 0.261; rs2058669 0.288	0.163188	0.11989	0.175819	0.154952	0.236979	0.356952	0.170658
PON3	7	94989255	95025680	Cis-Reg	1.57e-08	8.42e-09	1.59e-19	0.00333724	1.48e-08	1.7e-07	0.00641914	18	32	rs149867961 0.028; rs1859121 0.498	0.0592346	0.0779709	0.0128718	0.136754	0.0972045	0.0491921	0.0108086
TNR	1	175284329	175712906	Cis-Reg	0.000541803	0.00476642	0.036022	1.91e-05	0.000193736	7.24e-07	0.0064871	165	194	rs2235256 0.473	0.00328425	0.00307933	0.0327259	0.00023871	0.00148787	6.14379e-05	0.0218055
TNFRSF1B	1	12227059	12269285	Cis-Flank	6.16e-06	4.29e-06	6.3e-07	1.26e-07	8.3e-08	5.03e-14	0.00672104	166	180
MERTK	2	112656055	112787138	Cis-Reg	3.28e-16	8.28e-16	0.0127846	8.61e-11	2.39e-17	1.59e-20	0.00683371	88	159	rs908518 0.426	0.0181743	0.0156897	0.712492	0.010516	0.0216535	0.00776826	0.234027
ITGB2	21	46305867	46351904	Cis-Reg	4.83e-08	6.45e-06	0.0165393	4.22e-06	2.29e-07	1.76e-12	0.00683689	101	123	rs760462 0.266	0.00139676	0.00375569	0.408453	0.00820461	0.00303677	0.000777692	0.0938017
TNFRSF6B	20	62328020	62330037	Cis-Flank	2.26e-16	1.24e-14	8.73e-07	2.34e-18	1.52e-18	3.53e-24	0.00689935	239	330	rs6062496 0.418	0.00510445	0.00529002	0.00528479	0.000358897	0.00167056	9.0487e-06	0.00366729	Yes
DRAXIN	1	11751785	11785914	Cis-Flank	2.27e-11	1.72e-11	0.000201148	4.7e-05	3.02e-08	9.04e-11	0.00709119	162	215	rs12069516 0.468	0.000548703	0.00055689	0.00129537	0.00335154	0.00062399	0.00196351	0.0612779
IFNGR1	6	137518620	137540586	Cis-Reg	2.97e-12	2.51e-11	3.48e-07	2.99e-08	5.74e-10	2.31e-12	0.00742129	10	17	rs11754268 0.188
MDGA1	6	37598454	37667082	CDS-regions	9.36e-27	1.55e-21	1.96e-06	7.82e-28	2.68e-31	9.9e-30	0.00749744	10	12	rs56343594 0.486; 6:37587208 0.03; 6:38971524 0.011; rs7745284 0.281
TFPI2	7	93514708	93520303	Cis-Reg	0.000609341	0.00049584	0.000110825	0.000555226	0.000474042	1.73e-06	0.00753388	16	18
RGMA	15	93578502	93632433	Cis-Reg	1.92e-19	2.48e-19	0.00126635	4.48e-07	3.71e-19	2.95e-21	0.00757731	82	120	rs55816698 0.407
CPA2	7	129906666	129929638	Cis-Flank	1.92e-09	2.36e-09	0.0553265	9.55e-10	1.07e-08	4.15e-08	0.0075922	67	79	rs2200676 0.29
TREML2	6	41158014	41168932	Cis-Flank	1.88e-06	5.82e-07	0.00021005	1.25e-10	5.06e-08	6.04e-12	0.00808299	52	40	rs62396356 0.096
DRAXIN	1	11751785	11785914	Cis-Reg	0.0265818	6e-06	3.57e-07	2.96e-06	0.000398981	2.07e-05	0.00812316	30	39	rs12069516 0.468
SELP	1	169558086	169599431	Cis-Flank	5.13e-06	1.46e-06	0.0059051	1.41e-07	1.82e-07	2.85e-06	0.00851872	58	81	rs139249907 0.017; rs9332575 0.1; rs2298903 0.36
LY9	1	160765863	160798051	Cis-Flank	2.43e-18	2.33e-19	1.16e-05	5.18e-12	9.56e-19	1.84e-14	0.00900825	96	155	rs183360985 0.037; rs474918 0.273
CD244	1	160799949	160832645	Cis-Flank	9.24e-09	2.99e-09	0.00298875	2.07e-06	2.51e-08	2.12e-11	0.00911535	82	103	rs1319651 0.447
FRZB	2	183698001	183731890	CDS-regions	4.37e-18	1.43e-17	2.27e-15	1.77e-18	2.08e-14	2.52e-20	0.00935724	7	1	rs288326 0.046; rs4427983 0.178	0.404078	0.269933	0.394153	0.403107	0.308205	0.29794	0.29794
FABP2	4	120238404	120243545	CDS-regions	1.21e-06	4.65e-07	0.0195068	1.91e-07	5.21e-07	2.97e-07	0.00945215	1	3	rs7677068 0.336
TNFRSF13B	17	16833129	16875432	CDS-regions	0.0082537	1.41e-05	3.35e-13	7.57e-12	8.42e-07	3.94e-08	0.00965478	5	7	17:16843195 0.034	0.00277371	0.0112028	0.00737461	0.000171744	0.000406806	1.3269e-05	0.0168436	Yes
LGALS3	14	55590827	55612131	CDS-regions	2.33e-21	3.11e-25	1.16e-06	1.21e-25	1.28e-27	2.77e-28	0.00983251	5	4	rs79109213 0.07; rs3742566 0.494
TCL1A	14	96176303	96180533	Cis-Flank	9.77e-08	8.34e-09	0.424073	0.000735905	5.74e-06	5.26e-08	0.010254	45	81	rs10131341 0.348
TLR3	4	186990305	187009223	Cis-Reg	7.13e-123	1.1e-58	1.17e-13	2.49e-73	2.31e-116	7.32e-133	0.0105305	25	24	rs35103715 0.363; rs3775296 0.145	0.000240969	0.000709753	0.261386	0.000157659	0.00326278	2.62306e-05	0.499823	Yes
CTSC	11	88026759	88070955	Cis-Flank	2.52e-08	2.22e-09	8.06e-14	2.45e-38	1.26e-16	6.72e-17	0.0109303	65	117	rs11019400 0.095; rs217053 0.103
MMP12	11	102733466	102745764	Cis-Reg	4.12e-35	6.25e-30	4.11e-07	1.22e-20	1.88e-20	9.39e-19	0.0111852	2	6	rs2005108 0.159
MPO	17	56347216	56358296	Cis-Reg	2.43e-05	3.36e-07	1.49e-07	6.14e-08	2.28e-09	5.07e-11	0.0116992	20	16	rs34097845 0.135; rs8178414 0.056; 17:56352981 0.018
KDR	4	55944643	55991756	CDS-regions	1.67e-11	8.84e-14	3.51e-27	8.71e-25	7.96e-24	1.21e-30	0.012183	11	11	rs34231037 0.044	1.56915e-05	6.19974e-07	0.00104194	5.71192e-07	6.31662e-07	2.92077e-07	0.0268609	Yes
CD5	11	60869866	60895324	Cis-Flank	1.65e-07	3.01e-07	0.00593451	1.49e-07	2.08e-08	2.27e-08	0.0123039	144	141
SORT1	1	109852189	109940573	Cis-Reg	0.000787251	0.00104967	0.0002687	5.95e-06	0.000206198	1.44e-06	0.0123608	64	37	rs12740374 0.215
SMOC2	6	168841830	169073984	CDS-regions	2.99e-07	3.92e-07	0.0165454	3e-07	2.72e-07	4.03e-07	0.0124253	7	7	rs4708738 0.284; rs2609313 0.233
TMPRSS5	11	113558271	113577095	CDS-regions	1.12e-51	2.32e-49	5.09e-08	4.65e-50	1.32e-60	2.66e-71	0.0127326	6	8	rs7114195 0.319	0.00052201	0.00051876	0.0459177	0.0378158	0.00459568	0.00138712	0.12384
FOLR3	11	71825914	71850936	Cis-Reg	1.2e-54	2.94e-54	4.42e-31	1.49e-41	1.2e-42	3.9e-56	0.0129067	12	25	rs139130389 0.148
SORT1	1	109852189	109940573	Cis-Flank	9.85e-08	2.19e-10	0.0179608	2.89e-07	5.8e-09	9.97e-12	0.0133505	157	128	rs12740374 0.215	4.60136e-06	4.32643e-06	0.177306	0.00071943	1.22316e-05	0.000317955	0.0696332	Yes
HBEGF	5	139712427	139726216	Cis-Flank	9.32e-06	1.1e-05	0.0577213	0.000119394	8.54e-06	5.33e-06	0.0134675	78	68
TMPRSS5	11	113558271	113577095	Cis-Reg	1.12e-50	3.71e-54	1e-10	3.36e-32	1.03e-54	2.42e-43	0.0137858	18	28	rs7114195 0.319
TNFRSF9	1	7975953	8003225	Cis-Flank	1.93e-07	8.13e-08	0.05985	0.000150426	6.91e-08	8.86e-15	0.0138191	74	71	rs11584201 0.495	0.000748445	0.00117953	0.00963979	0.00203111	0.00053066	0.0261816	0.973557
CCL17	16	57438678	57449974	Cis-Reg	4.32e-09	6.41e-09	0.00312913	2.1e-05	6.71e-10	2.07e-11	0.01446	37	26	rs223829 0.35	0.0160525	0.0039752	0.000187623	0.00150611	0.00042258	1.14775e-05	0.000115684	Yes
VWC2	7	49813256	49961546	Cis-Reg	0.00356563	3.86e-06	9.12e-06	0.00144557	0.000821722	9.29e-06	0.0145167	64	53	rs481076 0.428; rs886614 0.424
FCRLB	1	161691352	161697933	CDS-regions	1.03e-08	3.17e-06	0.013222	4.28e-06	6.2e-07	7.57e-10	0.0151322	6	3	rs12040409 0.06
GPNMB	7	23275585	23314727	Cis-Reg	1.49e-08	3.16e-10	0.00192302	6.53e-20	0.00202516	2.38e-14	0.015259	87	25	rs191297708 0.046; rs10227559 0.272
MATN3	2	20191871	20212455	CDS-regions	6.07e-09	5.81e-08	0.0197941	6.68e-05	2.12e-08	2.27e-15	0.0162295	2	5	rs10178256 0.483
GDF15	19	18485540	18499986	Cis-Flank	0.000841353	0.00204646	0.018905	6.48e-11	4.18e-05	3.91e-06	0.016262	236	207	rs74180880 0.146	0.0682641	0.0219178	0.130333	0.00217797	0.0594377	2.02349e-05	0.0321187	Yes
CST5	20	23856571	23860387	Cis-Reg	3.74e-16	8.47e-14	0.00704565	3.62e-17	1.39e-18	8.07e-17	0.0163043	4	15	rs4813509 0.532
TNFRSF10C	8	22941867	22974950	CDS-regions	9e-09	4.13e-10	0.0121322	0.000239282	3.65e-10	1.1e-08	0.0167931	4	5	rs11784599 0.264
CNTN1	12	41086243	41466220	Cis-Reg	5.56e-05	1.31e-05	6e-05	8.25e-07	8.82e-07	3.39e-07	0.0171001	144	217	rs1444206 0.175; rs11177830 0.132
TIMP4	3	12194550	12200851	Cis-Reg	1.71e-11	4.87e-07	0.00797064	2.15e-07	2.87e-06	3.79e-07	0.0173648	9	13	rs11707641 0.216	1.59907e-06	0.0413683	0.00634256	1.51991e-06	4.5061e-05	1.0605e-06	0.0501532	Yes
DDR1	6	30844197	30867933	Cis-Flank	4.1e-26	2.38e-27	2.3e-05	1.43e-15	4.79e-26	1.29e-27	0.0182018	134	272	rs3132574 0.461; rs2524236 0.341; rs77226840 0.044
CNTN1	12	41086243	41466220	Cis-Flank	1.98e-06	1.41e-06	0.000383205	5.16e-07	3.79e-07	5.88e-08	0.0185069	28	38	rs1444206 0.175; rs11177830 0.132	0.0320735	0.0274724	0.00667013	0.00396831	0.00884504	0.000340519	0.0678027
ASAH2	10	51942537	52008370	CDS-regions	9.85e-11	1.08e-09	9.17e-11	9.81e-11	6.7e-11	2.3e-12	0.0185682	1	2	rs2043616 0.468; rs146075547 0.016; rs7067773 0.035; rs10824201 0.354
TNFSF12	17	7452207	7461207	CDS-regions	0.000103706	3.99e-07	0.000845486	5.65e-08	2.1e-06	8e-06	0.018687	2	5	rs1642763 0.289	0.00325834	0.00031181	0.0622236	0.000299037	0.000911439	0.000591695	0.0499196
MATN3	2	20191871	20212455	Cis-Flank	7.85e-08	2.74e-07	7.81e-05	2.24e-06	3.89e-08	2.65e-13	0.0190301	64	94	rs10178256 0.483
DDR1	6	30844197	30867933	Cis-Reg	4.12e-26	1.08e-25	3.66e-05	5.4e-30	2.61e-29	1e-32	0.0191434	44	76	rs3132574 0.461; rs2524236 0.341; rs77226840 0.044	0.122319	0.102853	0.142783	0.112578	0.124893	0.15119	0.213648
FABP2	4	120238404	120243545	Cis-Reg	1.03e-05	8.74e-05	0.0381516	7.12e-06	9.31e-06	3.57e-06	0.0206187	9	31	rs7677068 0.336
SIGLEC1	20	3667616	3687775	Cis-Flank	0.000106528	0.00290734	5.04e-05	2.53e-11	5.36e-08	1.09e-06	0.0206286	176	215	rs1005885 0.083
SCARA5	8	27727398	27850244	Cis-Reg	1.09e-10	4.2e-09	7.84e-05	7.92e-13	6.82e-14	3.25e-13	0.0208196	139	229	rs4276643 0.372; rs4732771 0.146
GLO1	6	38643700	38670917	Cis-Flank	5.43e-19	8.73e-25	1.04e-06	3.16e-09	1.54e-16	1.84e-17	0.020865	37	97	rs4746 0.289
CCL25	19	8117650	8127534	Cis-Reg	5.58e-34	7.07e-33	0.000156127	1.27e-30	1.16e-37	5.11e-47	0.0209335	10	17	rs2032887 0.297; rs11260049 0.463	0.104307	0.150928	0.729378	0.190346	0.341878	0.231226	0.702765
CCL25	19	8117650	8127534	Cis-Flank	1.4e-24	3.88e-22	1.58e-05	1.12e-15	4.73e-23	5.45e-25	0.0209432	113	155	rs2032887 0.297; rs11260049 0.463
VSIG2	11	124617367	124622134	CDS-regions	4.65e-11	1.51e-11	0.0137273	6.49e-12	4.82e-11	3.22e-12	0.0212128	4	1	rs2075713 0.212
ITGB2	21	46305867	46351904	CDS-regions	2.93e-07	0.000981725	0.173682	1.49e-05	3.41e-07	2.37e-10	0.0220076	17	12	rs760462 0.266
ANPEP	15	90328119	90358633	CDS-regions	9.87e-10	1.96e-13	4.66e-07	7.45e-11	1.66e-12	6.81e-11	0.0225441	12	15	rs1042499 0.082; rs28698386 0.439
IL1RL2	2	102803432	102856462	Cis-Flank	1.64e-12	5.46e-15	8.82e-05	4.19e-12	5.57e-14	3.24e-22	0.0226501	71	83	rs12474258 0.486
THBD	20	23026269	23030378	Cis-Reg	9.56e-21	1.29e-12	0.0749209	1.78e-20	2.15e-16	8.26e-29	0.0230909	15	7	rs1042579 0.219
IL1R2	2	102608305	102645006	CDS-regions	1.52e-05	1.55e-05	0.0850776	1.42e-05	0.00188404	6.79e-08	0.0243907	5	1	rs2310170 0.452
ALCAM	3	105085752	105295744	CDS-regions	0.000245868	0.00874226	0.000246629	2.51e-05	7.58e-06	2.01e-06	0.0258347	3	10
SCARA5	8	27727398	27850244	Cis-Flank	3.04e-07	8.17e-08	1.23e-05	1.66e-15	5.19e-11	1.88e-11	0.0268398	130	177	rs4276643 0.372; rs4732771 0.146	0.0012768	0.00324421	0.051943	0.00504442	0.00197098	0.0085436	0.0831287
IL18R1	2	102927988	103015235	CDS-regions	1.08e-43	1.21e-27	0.00645719	1.61e-08	4.35e-43	9.08e-40	0.0268804	4	3	rs917997 0.244; rs12999517 0.17
ICOSLG	21	45642873	45660849	Cis-Reg	1.3e-14	1.88e-22	0.00114962	1.06e-12	3.94e-15	1.11e-13	0.0271663	36	31	rs2847224 0.422; rs4818888 0.24	0.0776103	0.27854	0.547594	0.13083	0.295866	0.183823	0.315107
CTRC	1	15764934	15775737	CDS-regions	2.84e-08	2.46e-07	0.00295973	2.69e-07	1.23e-09	1.01e-07	0.0284991	3	3		2.51744e-12	5.92845e-11	7.02129e-05	5.05796e-11	4.77253e-15	1.20546e-12	0.0013999	Yes
IL15RA	10	5985601	6020150	Cis-Flank	1.63e-10	8.11e-12	0.000131688	7.64e-14	3.23e-13	4.66e-12	0.0287323	108	154	rs3136630 0.277; rs144173272 0.011
IL2RA	10	6052651	6104288	Cis-Flank	9.34e-20	5.08e-13	4.25e-08	9.49e-22	1.01e-23	1.05e-23	0.0287585	137	213	rs12722497 0.065; rs12722588 0.143; rs72650666 0.026
IL15RA	10	5985601	6020150	Cis-Reg	4.27e-20	1.34e-18	0.000749098	2.27e-22	8.86e-23	3.83e-19	0.0293049	74	75	rs3136630 0.277; rs144173272 0.011
TFRC	3	195754053	195809060	Cis-Flank	1.47e-07	6.15e-08	9.24e-05	7.75e-08	4.33e-08	8.54e-08	0.030409	117	157	rs3817672 0.323
TNFRSF1B	1	12227059	12269285	Cis-Reg	5.74e-05	0.000116788	2.08e-06	3.82e-07	5.62e-07	2.95e-11	0.0304472	52	71
LGALS9	17	25956823	25976586	Cis-Reg	1.63e-31	1.33e-30	0.0479062	2.05e-31	2.29e-32	1.42e-45	0.030774	31	42	rs4794979 0.199	0.0111704	0.0387198	0.656915	0.0366149	0.097326	0.00822764	0.721877
CCL17	16	57438678	57449974	Cis-Flank	8.1e-09	1.03e-08	0.00302771	4.89e-09	3.06e-08	9.68e-11	0.0309766	140	122	rs223829 0.35
GFRA1	10	117816435	118032979	Cis-Flank	2.94e-15	8.84e-17	0.000832191	1.81e-10	1.32e-16	7.48e-17	0.0324429	29	32	rs2420255 0.309
CXCL9	4	76922427	76928641	Cis-Flank	2.69e-06	2.6e-06	0.126432	0.00107586	2.57e-06	2.52e-08	0.0327367	35	53
TREML2	6	41158014	41168932	Cis-Reg	1.61e-06	1.02e-05	0.00587337	3.84e-11	5.62e-10	2.19e-11	0.0335817	21	20	rs62396356 0.096
ADAM23	2	207308262	207485854	CDS-regions	2.26e-05	2.29e-05	0.0393832	2.21e-05	1.28e-05	3.61e-06	0.0337304	8	1	rs13429599 0.253; rs116360212 0.045; rs1448903 0.068; rs34088381 0.035
GFRA1	10	117816435	118032979	Cis-Reg	1.11e-13	9.27e-18	0.00111051	7.56e-12	5.63e-15	2.03e-13	0.0373804	94	105	rs2420255 0.309	0.0024742	0.00246154	0.0417684	9.92506e-05	0.000630373	8.53389e-05	0.106189
FABP2	4	120238404	120243545	Cis-Flank	1.58e-09	9.79e-10	0.0336258	3.86e-07	7.76e-10	4.53e-10	0.038881	15	34	rs7677068 0.336	0.0782985	0.0491504	0.0666116	0.103281	0.062945	0.0271687	0.0217536
SCAMP3	1	155225769	155232221	CDS-regions	6.09e-05	5.36e-05	0.0983488	5.02e-05	8.1e-05	3.46e-07	0.0390623	3	3
BOC	3	112929849	113006306	CDS-regions	1.1e-06	2.75e-06	0.071824	2.3e-05	1.97e-07	8.4e-06	0.039245	11	17	rs11717833 0.309
CD300C	17	72537246	72542282	CDS-regions	9.68e-41	3.97e-43	5.22e-13	2.28e-56	3.06e-56	2.4e-46	0.0417323	1	6	rs58440339 0.152; rs2272111 0.192; rs147444017 0.061
NT5E	6	86159301	86205509	Cis-Flank	1.59e-24	7.64e-25	0.000716153	1.03e-22	2.03e-25	2.03e-29	0.0418103	53	73	rs637346 0.16	6.90091e-06	7.66008e-06	0.880268	0.00148998	8.39773e-05	0.00252881	0.597414	Yes
TFPI	2	188328956	188430487	CDS-regions	9.12e-28	1.42e-27	0.000193354	2.42e-30	5.7e-32	5.88e-27	0.0429543	1	3	rs12104503 0.261; rs2058669 0.288
NT5E	6	86159301	86205509	Cis-Reg	3.39e-16	5.75e-17	0.000778548	5.46e-16	3.89e-18	2.01e-22	0.04455	25	29	rs637346 0.16
CEACAM1	19	43011455	43065386	Cis-Flank	7.36e-13	1.27e-12	0.000120816	6.81e-13	1.33e-13	4.69e-13	0.0447442	54	31	rs851302 0.132
RET	10	43572474	43625799	Cis-Reg	0.000930404	0.000959225	0.00363925	3.13e-06	0.000219877	3.3e-05	0.0456176	34	61	rs2796561 0.281; rs2565203 0.263	0.226452	0.415544	0.489768	0.185798	0.366461	0.249195	0.867778
HSPG2	1	22148737	22263790	Cis-Flank	2.23e-06	1.5e-06	0.0132646	4.86e-10	1.65e-07	9.83e-07	0.0464068	320	303	rs4654770 0.196
CNTN5	11	98891682	100229616	Cis-Flank	2.94e-07	3.29e-07	2.34e-07	1.25e-09	1.54e-10	1.02e-10	0.0472286	35	45	rs282486 0.083; rs7929307 0.424; rs36063616 0.093
IL4R	16	27324988	27376099	Cis-Reg	1.37e-07	3.56e-09	0.113189	3.96e-05	2.9e-07	1.01e-12	0.0483269	63	69	rs12927172 0.44	0.0696651	0.240123	0.413122	0.0268128	0.0793319	0.0344673	0.621376
CLEC10A	17	6977855	6983626	Cis-Reg	4.88e-14	5.16e-17	0.000107198	3.82e-06	1.54e-10	9.8e-16	0.0557526	17	20	rs90951 0.392; rs920765 0.322
EPHB6	7	142552822	142568847	Cis-Flank	8.86e-10	1.78e-10	5.49e-05	1.66e-05	1.97e-07	5.18e-10	0.0559672	68	85	rs7789303 0.311
NT5E	6	86159301	86205509	CDS-regions	2.65e-05	0.450683	0.00962414	1.3e-17	7.98e-09	5.76e-09	0.0581916	5	4	rs637346 0.16
DLK1	14	101192041	101204561	Cis-Reg	3.8e-10	2.02e-12	0.0153861	4.98e-07	3.5e-10	1.14e-07	0.0605941	28	25	rs12881545 0.44
CTSS	1	150702671	150738433	CDS-regions	1.55e-35	3.32e-33	0.00789939	7.75e-13	1.97e-27	8.04e-34	0.0607558	4	4	rs4970988 0.327; rs12073630 0.052
CTSS	1	150702671	150738433	Cis-Reg	5.17e-29	6.56e-31	0.00579743	1.75e-36	2.55e-33	5.34e-34	0.0608246	33	31	rs4970988 0.327; rs12073630 0.052
TIMP4	3	12194550	12200851	Cis-Flank	1.97e-07	2.45e-10	0.000253737	1.65e-07	4.16e-08	3.04e-09	0.0614427	29	30	rs11707641 0.216
RGMB	5	98104353	98134347	CDS-regions	0.000114479	0.000314894	0.0295867	0.00010588	0.000711711	3.62e-07	0.0634044	7	2	rs1840496 0.359
HSPG2	1	22148737	22263790	Cis-Reg	1.68e-07	3.92e-11	0.0806086	1.78e-10	5.46e-10	8.13e-08	0.0647882	118	112	rs4654770 0.196
IL4R	16	27324988	27376099	CDS-regions	8.56e-08	2.77e-06	0.281717	2.84e-07	1.81e-07	1.31e-10	0.0663502	14	16	rs12927172 0.44
ADAM8	10	135075906	135090372	Cis-Reg	2.72e-19	5.84e-19	2.64e-21	4.85e-20	4.84e-21	6.97e-29	0.0670971	30	33	rs5789159 0.049	0.0414671	0.616192	0.269649	0.111643	0.395302	0.0262778	0.0364672
TFRC	3	195754053	195809060	Cis-Reg	2.39e-07	1.19e-07	6.37e-05	1.75e-11	5.42e-08	7.46e-09	0.0697808	66	98	rs3817672 0.323	0.00787072	0.0316871	0.00525719	0.00484767	0.00596594	0.000150308	0.0990906
KLK11	19	51525471	51531295	Cis-Flank	2.35e-06	6.46e-07	4.47e-08	1.83e-12	2.41e-11	6.06e-08	0.0708083	97	129	rs117268623 0.025
IFNGR1	6	137518620	137540586	Cis-Flank	6.79e-06	2.95e-13	1.44e-07	1.9e-08	7.94e-08	2.92e-10	0.0718912	92	77	rs11754268 0.188	0.0953297	0.0420598	0.00406545	0.0116166	0.00730416	0.0153773	0.469353
SLAMF7	1	160708846	160724611	Cis-Flank	7.57e-14	2.84e-13	0.136018	0.000111265	2.51e-11	7.48e-11	0.072839	141	198	rs11581248 0.089; rs139821064 0.01
AGER	6	32148744	32152101	CDS-regions	0.00778142	7.83e-06	0.000308271	2.33e-06	2.98e-05	3.1e-05	0.0736672	2	6
KLK8	19	51499262	51505967	Cis-Reg	0.00358161	0.00630994	0.000118453	7.41e-08	4.71e-05	5.78e-06	0.0759149	17	16	rs74705037 0.06	0.290002	0.457603	0.153107	0.195685	0.429128	0.129785	0.201957
ICOSLG	21	45642873	45660849	CDS-regions	2.55e-13	1.4e-11	0.048298	2.33e-11	2.46e-14	4.01e-13	0.0785127	6	6	rs2847224 0.422; rs4818888 0.24
VWC2	7	49813256	49961546	Cis-Flank	9.71e-16	3.76e-23	6.45e-06	8.51e-17	1.5e-11	1.84e-21	0.0829926	28	9	rs481076 0.428; rs886614 0.424
TNFSF12	17	7452207	7461207	Cis-Reg	1.13e-06	4.17e-07	0.001755	7.25e-08	4.25e-07	8.27e-07	0.0842257	8	17	rs1642763 0.289
SFTPD	10	81697495	81742370	CDS-regions	1.36e-41	2.63e-10	3.93e-09	4.92e-28	4.42e-42	6.6e-39	0.0860317	3	8	rs721917 0.303; rs7084667 0.367	0.0383628	0.00736943	0.0137322	0.00661437	0.0014088	0.00358704	0.0366093
WIF1	12	65444405	65515346	Cis-Flank	5.38e-06	5.27e-05	0.548445	0.00139398	9.45e-05	1.58e-05	0.0862956	37	16	rs10878219 0.36	0.241338	0.224877	0.530787	0.0922829	0.172406	5.46789e-06	0.0173646	Yes
TNFRSF10B	8	22877645	22926692	CDS-regions	1.06e-10	8.95e-05	5.03e-08	4.94e-10	2.23e-11	5.52e-13	0.0881654	2	6	rs4871844 0.358; rs7841989 0.074	0.00251666	1.50429e-05	9.17855e-06	2.54117e-06	3.06146e-06	1.03991e-06	0.00300517	Yes
EPHB6	7	142552822	142568847	CDS-regions	0.000274923	0.0119671	5.58e-05	9.1e-05	2.88e-05	5.63e-07	0.0882182	10	8	rs7789303 0.311
UNC5C	4	96083654	96470357	Cis-Reg	4.95e-18	9.3e-18	0.0852357	4.25e-07	2.05e-16	1.87e-18	0.0902518	235	220	rs7681109 0.458	0.000937385	0.00321343	0.261499	0.0241939	0.00373169	0.00581239	0.0735522
SIGLEC1	20	3667616	3687775	Cis-Reg	0.000344553	0.00782752	6.11e-06	8.46e-10	2.74e-08	1e-06	0.090446	17	25	rs1005885 0.083
GLO1	6	38643700	38670917	Cis-Reg	3.21e-27	7.18e-18	0.000114986	3.25e-20	1.52e-29	2.82e-32	0.0911663	17	32	rs4746 0.289
RGMB	5	98104353	98134347	Cis-Flank	5.68e-12	1.16e-11	0.000252593	2.48e-11	6.53e-13	4.1e-18	0.0914906	52	40	rs1840496 0.359	2.72134e-06	1.61115e-06	0.0223647	2.34784e-05	5.87807e-06	2.7532e-07	0.773565	Yes
RARRES2	7	150035405	150038763	Cis-Flank	1.83e-05	4.33e-05	0.038872	1.22e-06	8.86e-06	7.7e-06	0.0928834	120	148	rs55974958 0.213
FLT4	5	180028505	180076624	CDS-regions	1.26e-06	0.00800101	0.384752	2.5e-05	0.000110885	1.88e-10	0.0942316	25	14	rs34221241 0.142	0.105015	0.46931	0.74507	0.590201	0.548819	0.531869	0.499167
XCL1	1	168545710	168551315	Cis-Reg	0.000163577	2.49e-07	0.635324	0.00029071	0.000179054	2.15e-06	0.0969177	5	11	rs34328291 0.149; rs61802612 0.039; rs28537856 0.032; rs16860872 0.158
SIGLEC9	19	51628164	51639908	Cis-Reg	1.86e-33	8.19e-30	0.000167999	4.23e-16	1.15e-37	8.67e-30	0.0986999	10	14	rs2673908 0.43	0.197015	0.175282	0.0449188	0.13278	0.0645361	0.0204809	0.0422384
ERBB4	2	212240441	213403565	Cis-Reg	8.79e-09	8.82e-08	0.0148438	7.62e-10	3.54e-08	8.29e-07	0.0996093	327	440
CLEC1B	12	10138240	10166023	Cis-Flank	7.08e-05	7.95e-06	0.0976423	3.42e-05	9.2e-05	2.29e-06	0.100426	48	48	rs544605 0.265
CD5	11	60869866	60895324	Cis-Reg	1.18e-05	3.14e-06	0.15708	9.08e-05	5.15e-05	9.48e-06	0.10478	22	18
CLEC10A	17	6977855	6983626	CDS-regions	4.93e-19	8.72e-17	0.00293132	1.61e-19	1.97e-21	1.17e-24	0.106571	5	5	rs90951 0.392; rs920765 0.322	0.529737	0.222256	0.0299108	0.122695	0.0290626	0.0287795	0.00900286
CTSS	1	150702671	150738433	Cis-Flank	1.91e-25	4.53e-27	0.0103379	3.2e-37	1.01e-29	2.38e-29	0.107285	39	24	rs4970988 0.327; rs12073630 0.052	0.0668806	0.0536074	0.618999	0.455628	0.259156	0.198372	0.363744
CTSD	11	1773981	1785803	Cis-Reg	6.14e-12	9.4e-12	3.6e-06	9.35e-09	5.31e-08	6.86e-11	0.109265	38	28	rs56227787 0.238
ERBB4	2	212240441	213403565	Cis-Flank	8.23e-08	6.78e-08	0.00133735	5.09e-08	3.16e-08	1.96e-08	0.111487	83	79
PGLYRP1	19	46522410	46526323	Cis-Flank	1.05e-06	1.36e-05	0.085589	0.000118683	4.29e-05	4.66e-06	0.112548	75	61	rs2041992 0.26
KLK11	19	51525471	51531295	CDS-regions	2.47e-09	1.21e-24	7.16e-37	8.23e-27	5.11e-30	1.74e-25	0.113552	3	6	rs117268623 0.025	8.52032e-06	6.51998e-11	6.86962e-10	4.39777e-13	3.52641e-11	1.87778e-09	0.207189	Yes
IL1RL2	2	102803432	102856462	Cis-Reg	2.29e-16	1.67e-16	0.0058723	1.87e-12	3.14e-19	1.36e-24	0.11451	33	26	rs12474258 0.486	0.00855712	0.00181538	0.161028	0.000168253	0.00322282	5.57366e-05	0.381523
IL4R	16	27324988	27376099	Cis-Flank	2.95e-08	1.78e-08	0.245858	5.15e-05	5.36e-07	9.58e-12	0.115643	177	167	rs12927172 0.44
ACVRL1	12	52300691	52317145	Cis-Reg	2.44e-11	2.04e-11	1.32e-10	2.03e-17	4.06e-17	1.64e-15	0.117176	39	36	rs2277382 0.065; rs2277381 0.113	5.6275e-05	9.31063e-07	0.221725	1.70709e-05	0.000630057	4.43608e-05	0.273872	Yes
SELPLG	12	109016052	109027735	CDS-regions	1.46e-35	2.25e-43	3.41e-42	4e-44	4.24e-45	5.17e-50	0.121414	5	6	rs147222609 0.028
CRTAM	11	122709207	122743347	CDS-regions	1.46e-15	2.44e-08	0.0973075	2.07e-15	7.62e-17	1.31e-13	0.123351	3	4	rs59230519 0.204; rs2370794 0.339
KLK13	19	51559462	51568371	CDS-regions	0.00136999	2.28e-10	4.09e-10	4.75e-08	4.83e-08	1.65e-06	0.123936	2	4	rs3760739 0.439
MMP1	11	102660650	102668891	Cis-Reg	2.18e-13	1.55e-17	0.0159251	1.79e-10	4.18e-14	2.03e-13	0.125822	11	24	rs471994 0.352; rs514921 0.27	1.59847e-06	5.82329e-06	0.00879077	2.3307e-05	9.66768e-07	8.61408e-06	0.119892	Yes
IL12B	5	158741790	158757895	Cis-Reg	4.02e-24	1.94e-14	3.43e-07	9.1e-18	4.2e-20	1.9e-23	0.12629	3	10	rs10043720 0.268
FCGR2B	1	161632936	161648444	Cis-Reg	2.64e-34	7.71e-50	0.000180509	4.06e-49	1.63e-40	7.82e-36	0.126567	2	4	rs4657041 0.535; rs12118043 0.149; rs116205652 0.019	0.508701	0.782012	0.00716806	0.252737	0.0714681	0.00563474	0.00171923
CRNN	1	152381718	152386739	Cis-Flank	9.16e-11	3.08e-09	0.100415	1e-20	1.43e-15	3.32e-16	0.136012	18	27	rs10494275 0.093
BLMH	17	28575212	28619074	CDS-regions	3.88e-25	3.06e-25	0.100543	1.1e-25	2.83e-28	1.47e-26	0.137675	2	2	rs1050565 0.268	0.263354	0.00551352	0.157227	0.245608	0.0120883	0.251522	0.251522
CHI3L1	1	203148058	203155877	CDS-regions	3.39e-14	1.34e-07	0.000838008	1.76e-11	4.64e-16	8.65e-19	0.144566	6	3	rs4950928 0.314
CD38	4	15779897	15854853	Cis-Flank	3.1e-10	1.31e-10	0.0414099	3.05e-13	1.82e-11	4.21e-08	0.145912	109	104	rs66998564 0.175	0.00262283	0.00466323	0.589626	0.000667896	0.00771289	0.00151996	0.664516
BOC	3	112929849	113006306	Cis-Reg	2.61e-07	5.14e-07	0.0319284	0.00138447	8.5e-07	2.56e-05	0.146782	89	129	rs11717833 0.309
PDGFRA	4	55095263	55164414	Cis-Reg	1.59e-10	5.93e-09	1.65e-08	2.13e-11	2.26e-11	2.29e-14	0.14831	36	59	rs35597368 0.099	0.416285	0.346692	0.65894	0.445527	0.289084	0.798809	0.800741
LGALS3	14	55590827	55612131	Cis-Flank	1.09e-18	4.37e-18	2.62e-13	1.39e-24	4.17e-26	2.73e-22	0.149596	83	82	rs79109213 0.07; rs3742566 0.494
F3	1	94994780	95007356	Cis-Flank	5.15e-06	2.42e-06	0.034896	0.000197585	7.04e-06	1.86e-05	0.153011	44	54	rs11274910 0.404	0.000148594	0.000199588	0.0202813	0.000375559	5.68398e-05	4.31484e-05	0.00368905
LAYN	11	111411004	111432470	Cis-Reg	3.79e-40	2.66e-67	2.1e-05	1.56e-55	5.35e-32	1.19e-57	0.153479	27	8	11:111391081 0.067; rs4581484 0.307
CXCL9	4	76922427	76928641	Cis-Reg	1.83e-06	2.02e-05	0.138868	0.059528	5e-05	3.02e-05	0.155352	9	8
MMP1	11	102660650	102668891	CDS-regions	0.00144977	0.00288471	0.00588969	1.14e-06	1.05e-05	2.18e-06	0.156317	5	11	rs471994 0.352; rs514921 0.27
RARRES2	7	150035405	150038763	Cis-Reg	3.85e-08	2.28e-09	0.134848	4.57e-09	2.95e-09	1.9e-07	0.15876	13	12	rs55974958 0.213	0.499589	0.310956	0.441724	0.309274	0.806692	0.35448	0.506452
TNFSF14	19	6661263	6670599	CDS-regions	2.46e-10	1.81e-07	2.98e-07	8.69e-19	4.82e-17	8.45e-21	0.159702	3	3	rs344560 0.066	5.76807e-07	5.45102e-07	0.0670272	0.000152009	7.0898e-06	5.01355e-06	0.127496	Yes
HAVCR1	5	156456423	156486130	Cis-Reg	1.11e-28	3.83e-24	0.00596118	1.54e-12	2.97e-26	6.68e-23	0.160049	21	35	rs4704732 0.288; rs6149307 0.34	0.107472	0.0293816	0.27985	0.270602	0.169651	0.244102	0.413731
CD38	4	15779897	15854853	Cis-Reg	1.83e-07	3.28e-07	0.0791278	0.000205563	1.9e-05	4.9e-05	0.161727	65	46	rs66998564 0.175
KLK13	19	51559462	51568371	Cis-Reg	0.00923135	0.0904594	8.36e-08	1.95e-06	8.73e-06	7e-05	0.163395	10	11	rs3760739 0.439
MMP7	11	102391238	102401484	CDS-regions	0.0176041	0.0596187	7.03e-07	0.00042249	0.00263215	0.000524068	0.163984	5	4	rs56857975 0.091; rs12285347 0.291
LTBR	12	6484210	6500737	CDS-regions	3.29e-21	7.39e-22	0.0361307	1.82e-06	3.9e-24	2.79e-28	0.169345	4	4	rs5796234 0.436
PI3	20	43803516	43805185	CDS-regions	5.58e-07	5.32e-07	0.511118	5.75e-07	6.18e-07	4.38e-11	0.171969	1	4
ERBB3	12	56473640	56497289	Cis-Reg	1.25e-05	1.94e-05	0.159231	0.109654	0.000242978	7.11e-07	0.173445	41	19
LGALS3	14	55590827	55612131	Cis-Reg	1.23e-18	3.49e-18	3.6e-08	8.34e-30	8.65e-25	3.15e-23	0.173869	38	32	rs79109213 0.07; rs3742566 0.494	0.173271	0.211788	0.0493096	0.0523964	0.219231	0.000326067	0.695994
SCARA5	8	27727398	27850244	CDS-regions	1.35e-06	1.88e-11	0.32109	1.82e-06	1.12e-06	6.95e-06	0.177294	4	11	rs4276643 0.372; rs4732771 0.146
SIRPA	20	1874812	1921238	CDS-regions	4.25e-116	3.3e-116	0.563343	1.25e-120	1.74e-121	3.1e-122	0.182798	3	4	rs68087171 0.375; rs2254194 0.239	0.0274877	0.107381	0.417177	0.357624	0.588888	0.0164109	0.167585
FLT4	5	180028505	180076624	Cis-Flank	5.04e-06	8.45e-06	0.224414	0.00105541	7.76e-05	7.42e-07	0.199069	172	182	rs34221241 0.142
ADAM22	7	87563457	87832204	CDS-regions	2.94e-44	4.97e-23	1.02e-05	1.82e-13	6.19e-31	9.29e-35	0.205448	8	7	rs6966166 0.439; rs1201839 0.439	8.25776e-05	1.03392e-06	7.19443e-05	9.71918e-06	5.19938e-06	5.31916e-07	0.00734519	Yes
UNC5C	4	96083654	96470357	Cis-Flank	1.05e-12	5.33e-12	0.0832481	1.97e-07	2.19e-12	1.86e-14	0.206845	105	90	rs7681109 0.458
IL16	15	81451915	81606399	CDS-regions	2.27e-13	0.00025758	1.47e-15	5.93e-17	3.15e-17	3.24e-14	0.20993	1	11	rs17875509 0.068
CSTB	21	45192391	45196326	Cis-Reg	5.17e-11	1.12e-10	0.0604819	7.35e-08	3.87e-06	5.67e-10	0.210172	15	4	rs35285321 0.325
ADAM23	2	207308262	207485854	Cis-Flank	8.04e-17	4.22e-16	3.04e-17	9.64e-26	4.13e-27	1.41e-22	0.21095	32	34	rs13429599 0.253; rs116360212 0.045; rs1448903 0.068; rs34088381 0.035	0.0586925	0.0606205	0.00145853	0.0282364	0.00938749	0.000214721	0.0045386
ACP5	19	11685474	11689823	Cis-Reg	5.22e-10	2.1e-08	1.19e-07	7.13e-15	1.58e-13	1.24e-16	0.212695	16	18	rs79525531 0.15
WFIKKN1	16	679238	684116	Cis-Reg	3.13e-08	2.48e-09	0.104088	8.05e-16	2.06e-08	8.56e-14	0.213428	25	15	rs55798945 0.294
RGMB	5	98104353	98134347	Cis-Reg	1.76e-12	5.09e-12	0.001164	3.77e-10	2.73e-13	8.5e-18	0.214323	45	42	rs1840496 0.359
MERTK	2	112656055	112787138	CDS-regions	1.36e-13	2.98e-12	0.0896671	1.32e-07	2.95e-14	6.15e-14	0.221697	7	31	rs908518 0.426
TCL1A	14	96176303	96180533	Cis-Reg	2.87e-08	2.58e-08	0.671493	0.000107877	5.36e-07	1.95e-07	0.222736	11	23	rs10131341 0.348
SULT1A1	16	28616516	28634946	CDS-regions	1.7e-05	9.96e-06	0.264905	0.0062155	3.69e-05	5.64e-06	0.227082	3	3	rs138534121 0.074
CRNN	1	152381718	152386739	Cis-Reg	1.89e-16	4.77e-16	3.8e-12	8.24e-22	5.35e-20	8.87e-17	0.230309	1	9	rs10494275 0.093	0.000128495	0.000100286	0.202339	0.000116655	0.000118799	0.000132892	0.267783
CCL3	17	34415601	34417515	Cis-Flank	6.6e-11	1.77e-10	0.110364	1.2e-07	9.98e-08	3.06e-08	0.232036	97	118	rs1619526 0.247	0.0236894	0.0182354	0.337547	0.344928	0.109528	0.204084	0.2291
SIGLEC9	19	51628164	51639908	CDS-regions	6.56e-33	4e-07	0.329109	8.75e-13	2.12e-37	4.94e-31	0.238318	4	3	rs2673908 0.43
PDGFRA	4	55095263	55164414	Cis-Flank	3.06e-08	1.74e-08	0.00365252	3.31e-08	2.13e-09	1.02e-10	0.238641	40	40	rs35597368 0.099
CD200R1	3	112640055	112693969	Cis-Reg	1.88e-19	7.15e-17	2.22e-35	2.23e-38	3.15e-48	1.6e-46	0.243064	40	44	rs57891445 0.025; rs7611690 0.492	0.0542281	0.000506745	0.342117	0.199044	0.427801	0.0622466	0.331329
TNFSF12	17	7452207	7461207	Cis-Flank	2.53e-06	8.46e-07	0.0744714	6.93e-05	9.18e-06	6.73e-05	0.243144	142	150	rs1642763 0.289
MERTK	2	112656055	112787138	Cis-Flank	4.09e-16	3.85e-15	0.0414934	4.91e-10	6.04e-17	3.08e-16	0.258062	56	107	rs908518 0.426
ACP5	19	11685474	11689823	CDS-regions	1.45e-14	2.56e-14	0.00136786	1.34e-14	2.04e-15	4.44e-17	0.26636	2	3	rs79525531 0.15	0.145943	0.145298	0.242815	0.146319	0.247845	0.124726	0.309783
TNFRSF6B	20	62328020	62330037	CDS-regions	7.36e-11	2.31e-11	0.0231661	7.69e-14	2.06e-13	7.8e-14	0.273794	10	6	rs6062496 0.418
PDGFRA	4	55095263	55164414	CDS-regions	4.78e-12	1.66e-09	8.59e-05	4.74e-12	5.45e-14	1.99e-13	0.280263	4	5	rs35597368 0.099
SCARF2	22	20779104	20792113	CDS-regions	3.99e-25	1.5e-34	0.0734327	6.52e-28	6.75e-28	1.02e-30	0.288363	8	6	rs9610955 0.125	2.91124e-05	1.70501e-05	0.0643534	0.000968347	0.000937594	0.00093633	0.878941	Yes
IL17D	13	21276265	21297237	Cis-Reg	1.62e-06	2.88e-07	0.156061	0.000108374	2.81e-06	3.46e-06	0.289712	34	24	rs12867345 0.416
GZMB	14	25100159	25103473	Cis-Flank	6e-07	1.06e-05	0.000154817	4.19e-11	7.81e-09	1.3e-11	0.290212	24	31	rs2236337 0.19
CDCP1	3	45123769	45187914	Cis-Reg	6.04e-14	5.84e-15	0.00780876	3.32e-09	9.6e-14	1.12e-18	0.296526	57	88	3:45187581 0.226	0.00196328	0.00183347	0.127866	0.0200461	0.00356963	0.00959326	0.582099
CPE	4	166282345	166419472	Cis-Reg	4.02e-07	1.62e-07	0.00338877	9.48e-10	6.86e-08	2.88e-10	0.305792	56	141	rs1550270 0.32
CDCP1	3	45123769	45187914	Cis-Flank	1.11e-12	9.85e-12	0.208183	7.53e-08	5.23e-08	3.33e-11	0.308183	150	172	3:45187581 0.226
GZMB	14	25100159	25103473	CDS-regions	5.49e-12	3.46e-12	0.000250314	2.61e-12	1.08e-13	9.36e-15	0.30849	4	5	rs2236337 0.19	0.137716	0.144006	0.180491	0.149504	0.125428	0.308576	0.335676
CEACAM1	19	43011455	43065386	CDS-regions	2.6e-13	1.3e-11	0.0390012	2.39e-13	3.27e-14	6.2e-12	0.309582	3	4	rs851302 0.132	0.455913	0.204462	0.174267	0.381344	0.391473	0.186214	0.166863
HAVCR1	5	156456423	156486130	Cis-Flank	2.25e-28	2.27e-26	0.00244743	2.37e-15	5.06e-24	1.45e-24	0.313353	46	39	rs4704732 0.288; rs6149307 0.34
FAS	10	90750338	90775542	Cis-Reg	2.01e-06	8.79e-06	0.00299889	1.13e-05	6.13e-07	1.33e-09	0.32039	23	56	rs10887882 0.39	0.097845	0.427939	0.361807	0.0748432	0.0764585	0.0379138	0.573707
BLMH	17	28575212	28619074	Cis-Flank	7.52e-23	1.14e-21	0.0010704	3.66e-25	6.84e-28	7.54e-28	0.32411	41	34	rs1050565 0.268
SCARF2	22	20779104	20792113	Cis-Reg	1.3e-20	6.72e-21	0.302128	1.08e-14	8.44e-16	2.38e-18	0.332321	16	24	rs9610955 0.125
CDCP1	3	45123769	45187914	CDS-regions	3.8e-10	4.49e-13	0.53905	4.68e-06	0.000192357	3.51e-07	0.33593	9	8	3:45187581 0.226
PCSK9	1	55505220	55530525	Cis-Reg	3.98e-07	1.62e-06	0.329051	0.000313273	6.8e-07	1.45e-05	0.336018	24	60	rs17414716 0.023
TNFRSF11A	18	59992519	60058525	CDS-regions	6.29e-23	1e-25	7.1e-05	7.47e-25	9.15e-27	1.97e-22	0.339406	2	8	rs884205 0.493
ADAM8	10	135075906	135090372	CDS-regions	1.47e-20	1.44e-19	2.04e-22	1.57e-20	1.27e-21	4.97e-28	0.348438	11	17	rs5789159 0.049
CCL8	17	32646054	32648421	CDS-regions	8.14e-66	3.38e-54	2.43e-24	3.56e-70	6.33e-60	3.18e-57	0.349112	1	2	rs3138036 0.099; rs74832623 0.048; rs12601658 0.234	0.0539488	0.0539488	0.0539488	0.0539488	0.0539488	0.0515601	0.0515601
CASP8	2	202098165	202152434	CDS-regions	2.06e-06	0.0276592	0.506594	2.27e-08	8.5e-07	3.71e-06	0.349873	2	5	rs116010659 0.166	0.140516	0.571156	0.756918	0.110118	0.290273	0.185464	0.470617
MMP10	11	102641233	102651359	CDS-regions	4e-07	6.53e-05	7.79e-10	1.79e-10	2.98e-11	8.98e-08	0.363172	4	9	rs486055 0.134; rs17860955 0.022	0.0417667	0.00403012	1.51825e-09	0.000756497	1.04917e-05	0.00130753	0.468014	Yes
CD300LF	17	72690449	72709117	CDS-regions	7.43e-108	0.263028	0.0525159	8.18e-110	6.95e-122	6.74e-109	0.366143	4	4	rs10512597 0.181	0.00294588	0.919731	0.978348	0.161477	0.572421	0.468251	0.97546
CCL8	17	32646054	32648421	Cis-Reg	9.81e-21	1.32e-08	1.19e-26	4.81e-45	6.25e-46	4.79e-54	0.367571	6	6	rs3138036 0.099; rs74832623 0.048; rs12601658 0.234
CCL24	7	75440982	75452674	CDS-regions	4.94e-08	6.83e-06	0.0677662	0.000808479	1.55e-08	0.000238949	0.370534	1	6	rs2024050 0.052; rs76312007 0.128; rs58160288 0.301; rs190360124 0.079
KLK14	19	51580751	51587502	CDS-regions	7.6e-07	0.0182813	0.451328	2.26e-05	9.7e-07	8.49e-09	0.379439	4	3	rs2569491 0.3
BLMH	17	28575212	28619074	Cis-Reg	2.19e-26	6.98e-28	0.012112	5.51e-20	7.73e-27	7.32e-24	0.383372	25	28	rs1050565 0.268
FAS	10	90750338	90775542	Cis-Flank	2.15e-06	3.59e-06	0.50749	0.00213677	4.91e-06	8.06e-07	0.38704	71	97	rs10887882 0.39
FOLR3	11	71825914	71850936	CDS-regions	8.01e-82	4.29e-86	2.35e-09	1.12e-73	1.71e-71	6.46e-83	0.402612	2	3	rs139130389 0.148	0.0196986	0.0882711	0.259737	0.0296223	0.176002	0.03028	0.461188
LY9	1	160765863	160798051	CDS-regions	1.47e-16	1.34e-47	9.5e-48	4.97e-51	5.72e-29	6.71e-26	0.408614	6	8	rs183360985 0.037; rs474918 0.273	0.0959967	0.00416093	0.912129	0.151742	0.455855	0.140128	0.822793
EPHB6	7	142552822	142568847	Cis-Reg	1.91e-10	3.77e-12	0.000827104	1.55e-05	3.19e-06	9.59e-09	0.410274	40	31	rs7789303 0.311	0.0134875	0.0124242	0.314038	0.0168692	0.135624	0.0321975	0.87664
CD160	1	145695797	145715614	Cis-Reg	6.44e-16	3.22e-17	0.161332	1.82e-10	5.18e-18	1.95e-22	0.418537	26	14	rs9728526 0.4
CD40	20	44746910	44758502	Cis-Reg	1.4e-46	7.12e-42	0.0281878	2.59e-44	2.13e-50	3e-44	0.423182	16	22	rs6032660 0.245; rs182282247 0.021
IL5RA	3	3108009	3168297	CDS-regions	6.34e-10	2.96e-05	0.210034	1.89e-09	7.2e-08	1.72e-08	0.427055	5	5	rs1695315 0.302; rs3804790 0.124; rs183422392 0.019
CPA2	7	129906666	129929638	Cis-Reg	1.6e-08	5.81e-08	0.146534	2.32e-11	1.35e-10	5.19e-07	0.430998	13	13	rs2200676 0.29	0.00645056	0.00261557	0.227363	0.00270695	0.00860799	0.000857169	0.129763
FLRT2	14	85996487	86120770	CDS-regions	6.72e-32	2.54e-29	0.0121619	8.25e-22	7.25e-18	8.12e-23	0.437889	4	4	rs11291824 0.169; rs12881773 0.115
SCGB3A2	5	147250244	147261754	Cis-Reg	0.000442263	5.83e-05	2.06e-05	9.15e-06	3.79e-05	3.84e-06	0.444593	28	28		0.000776815	0.00545332	6.22983e-05	2.29501e-05	0.000104641	3.50824e-06	0.445022	Yes
LGALS1	22	38071614	38075813	Cis-Flank	2.05e-07	4.82e-08	0.0392887	0.000786749	9.85e-07	7.17e-06	0.448616	181	163	rs139136100 0.012; rs13058368 0.478
CASP3	4	185548849	185570663	Cis-Reg	1.16e-07	2.65e-08	0.0463737	7.27e-07	7.01e-09	3.07e-07	0.472162	10	24	rs34605630 0.328
CD4	12	6896023	6929974	CDS-regions	9.06e-05	0.000133151	0.0582411	0.0344904	0.000398894	1.29e-06	0.477058	3	5	rs73053728 0.216
HAVCR1	5	156456423	156486130	CDS-regions	1.56e-20	0.000828262	0.000146133	9.23e-11	1.07e-20	8.39e-23	0.479053	5	9	rs4704732 0.288; rs6149307 0.34
IL12B	5	158741790	158757895	CDS-regions	3.83e-07	2.7e-07	2.88e-07	3.72e-07	4.39e-07	4.9e-08	0.480039	2	3	rs10043720 0.268
PGLYRP1	19	46522410	46526323	CDS-regions	4.42e-12	4.38e-12	0.607364	7.24e-12	2.49e-08	3.25e-13	0.480926	3	1	rs2041992 0.26
TNFSF13	17	7461608	7464925	CDS-regions	1.2e-05	0.000165194	0.00095822	4.57e-06	2.87e-05	3.63e-05	0.48794	3	2
GPC1	2	241375087	241407495	CDS-regions	3.69e-13	2.91e-17	8.23e-06	1.52e-20	2.54e-19	1.2e-12	0.517693	5	13	rs1126920 0.118	0.0267338	0.0721311	0.856338	0.027258	0.0555235	0.0445147	0.389218
CEACAM1	19	43011455	43065386	Cis-Reg	1.1e-11	1.05e-12	0.191381	6.08e-12	1.92e-12	4.12e-11	0.521903	33	22	rs851302 0.132
SORT1	1	109852189	109940573	CDS-regions	3.78e-05	0.000234894	0.3898	1.15e-06	2.55e-05	1.65e-06	0.522561	6	6	rs12740374 0.215
CXCL5	4	74861358	74864496	Cis-Flank	5.49e-14	2.18e-11	7.22e-05	2.27e-27	8.28e-32	9.43e-30	0.533467	37	17	rs425535 0.092	4.02317e-05	0.000512554	0.161245	0.0159121	0.0302399	0.0253432	0.968967
PI3	20	43803516	43805185	Cis-Flank	4.19e-07	7.49e-07	0.808372	5.86e-07	6.35e-07	3.19e-12	0.535688	47	65
IL6R	1	154377668	154441926	CDS-regions	9.99e-97	1.07e-20	0.305845	1.06e-30	1.07e-85	1.59e-72	0.551337	7	4	rs12126142 0.337; rs12047973 0.216; rs1386821 0.225
CD300C	17	72537246	72542282	Cis-Reg	2.55e-19	2.94e-13	5.82e-13	1.59e-48	3.28e-28	9.4e-34	0.551414	12	16	rs58440339 0.152; rs2272111 0.192; rs147444017 0.061
GZMB	14	25100159	25103473	Cis-Reg	1.39e-11	9e-12	0.358764	6.61e-12	8.42e-12	1e-14	0.565485	14	10	rs2236337 0.19
ULBP2	6	150263135	150270371	Cis-Reg	2.62e-16	2.78e-20	2.37e-11	2.25e-13	9.33e-13	2.49e-16	0.573212	9	13	rs1951931 0.112; rs11964763 0.412; rs4343924 0.13
KLK11	19	51525471	51531295	Cis-Reg	0.000213777	4.98e-05	6.65e-29	4.29e-13	1.85e-11	1.8e-13	0.588915	16	20	rs117268623 0.025
WISP1	8	134203281	134242587	CDS-regions	5.79e-05	0.0846433	1.9e-07	1.6e-10	4.1e-08	3.55e-08	0.589203	4	4	rs2739145 0.299; rs16904845 0.361
IL2RA	10	6052651	6104288	CDS-regions	1.74e-07	2.47e-14	3.13e-15	2e-08	3.93e-13	9.9e-16	0.595552	5	6	rs12722497 0.065; rs12722588 0.143; rs72650666 0.026
TGFB1	19	41807491	41859816	CDS-regions	5.21e-09	1.4e-08	5.05e-08	7.43e-11	3.67e-11	9.2e-10	0.616269	3	5	rs1800472 0.042	0.00226309	0.00293128	0.881596	0.075095	0.0733638	0.158919	0.748232
TFRC	3	195754053	195809060	CDS-regions	3.77e-07	2.68e-09	0.00117121	5.35e-07	9.86e-09	3.5e-07	0.617119	4	10	rs3817672 0.323
RARRES2	7	150035405	150038763	CDS-regions	9.03e-08	9.68e-08	0.750079	3.06e-08	4.97e-08	1.02e-06	0.65518	4	4	rs55974958 0.213
IFNGR1	6	137518620	137540586	CDS-regions	8.12e-09	2.01e-11	8.79e-07	0.000122715	1.54e-09	3.49e-09	0.655628	2	6	rs11754268 0.188
LYPD3	19	43964938	43969812	Cis-Reg	2.08e-05	2.39e-05	0.186689	2.7e-07	2.51e-06	3.84e-07	0.710452	7	13	rs2599442 0.169
CASP3	4	185548849	185570663	Cis-Flank	9.46e-10	1.81e-07	0.0397963	1.18e-06	7.85e-08	3.15e-08	0.726375	53	91	rs34605630 0.328	0.0258394	0.0239001	0.495194	0.0226798	0.0127131	0.0218433	0.563522
IL17D	13	21276265	21297237	Cis-Flank	7.18e-08	5.99e-08	0.578288	4.6e-05	2.85e-07	1.53e-07	0.727408	42	32	rs12867345 0.416	0.000387647	0.000514854	0.152956	0.000312975	0.000182235	8.99128e-05	0.0841445
MUC16	19	8959519	9092018	Cis-Flank	2.01e-05	3.8e-05	0.024289	3.57e-06	1.11e-05	7.38e-06	0.73031	29	44	rs10425933 0.103	0.0583354	0.0540103	0.382938	0.110085	0.13882	0.0263889	0.0332665
CCL3	17	34415601	34417515	Cis-Reg	9.96e-08	1.04e-07	0.656128	1.09e-07	4.75e-06	1.27e-08	0.732843	9	4	rs1619526 0.247
WFDC2	20	44098345	44110172	Cis-Reg	2.08e-06	2.26e-05	0.0513926	3.13e-07	1.25e-06	2.03e-07	0.736986	15	15
CX3CL1	16	57406369	57418960	Cis-Reg	3.53e-06	4.85e-05	0.574739	2.52e-05	1.42e-05	1.22e-05	0.737365	41	33
CD6	11	60739151	60787849	CDS-regions	4.02e-14	4.82e-28	3.58e-15	2.44e-37	1.79e-27	2.28e-25	0.745264	7	17	rs11230563 0.165
FCGR2B	1	161632936	161648444	CDS-regions	2.99e-06	3.98e-06	3.45e-06	2.99e-06	0.00138654	4e-07	0.758153	1	1	rs4657041 0.535; rs12118043 0.149; rs116205652 0.019
SELPLG	12	109016052	109027735	Cis-Reg	1.63e-07	0.00226281	5.47e-53	1.16e-21	5.62e-24	1.38e-19	0.759378	28	30	rs147222609 0.028	0.385961	0.406466	0.322657	0.07403	0.511185	0.01808	0.801117
TNFRSF6B	20	62328020	62330037	Cis-Reg	1.25e-12	9.97e-13	0.827016	4.44e-10	1.02e-13	1.3e-14	0.759807	18	9	rs6062496 0.418
LAYN	11	111411004	111432470	CDS-regions	7.9e-67	2.24e-66	3.24e-23	1.79e-68	1.95e-48	6.15e-80	0.775912	4	1	11:111391081 0.067; rs4581484 0.307	0.344737	0.362451	0.327699	0.341826	0.339095	0.521411	0.521411
CD27	12	6554032	6560884	Cis-Reg	3.08e-23	9.46e-24	2.64e-10	1.17e-18	2e-30	2.5e-31	0.784961	8	23	rs7970260 0.469; rs79655535 0.176; rs25680 0.149	0.139345	0.171329	0.0450752	0.10854	0.123082	0.00880439	0.136131
LGALS9	17	25956823	25976586	CDS-regions	5.67e-31	9.54e-26	0.24906	3.63e-31	1.47e-31	1.07e-33	0.812731	1	2	rs4794979 0.199
GLO1	6	38643700	38670917	CDS-regions	4.3e-33	7.56e-37	8.95e-05	4.78e-16	1.38e-33	3.24e-30	0.823888	2	4	rs4746 0.289	0.0363729	0.0505219	0.689138	0.313633	0.305054	0.61251	0.976852
PI3	20	43803516	43805185	Cis-Reg	6.71e-07	8.96e-07	0.574173	7.2e-07	8.02e-07	2.95e-11	0.843595	4	18
PODXL	7	131185020	131242976	CDS-regions	0.0864433	0.622664	5.06e-07	0.000162806	0.000271783	0.000996088	0.860867	3	11	rs3212299 0.046	0.308519	0.756097	0.367939	0.848808	0.518249	0.406614	0.138844
TNFRSF1B	1	12227059	12269285	CDS-regions	0.000396668	0.000979603	0.000830697	0.000160012	0.00021243	2.09e-06	0.863623	7	7
CD70	19	6583193	6604114	CDS-regions	9.28e-07	7.38e-06	1	0.0162381	0.00022423	0.00674434	0.895251	1	2	rs7254538 0.406; rs3837945 0.105; rs11085182 0.501
CCL13	17	32683470	32685629	Cis-Reg	8.28e-06	0.000263218	2.44e-05	2.48e-08	2.23e-07	2.19e-07	0.900392	8	10	rs3136676 0.088	0.835162	0.759708	0.927247	0.981614	0.89054	0.972556	0.88165
MMP12	11	102733466	102745764	CDS-regions	3.07e-30	3.97e-30	3.43e-05	9.24e-33	1.14e-35	1.27e-32	0.907624	5	3	rs2005108 0.159	1.1147e-05	9.92355e-06	1.44157e-05	9.09268e-06	0.00123832	4.15386e-08	0.0020286	Yes
SEZ6L	22	26565439	26779563	CDS-regions	0.0669865	5.87e-07	5.55e-10	0.000815796	0.000688201	0.000417221	0.908156	9	8	rs137203 0.028	0.0613653	0.11759	0.692411	0.0861683	0.221848	0.249846	0.855146
TREML2	6	41158014	41168932	CDS-regions	4.49e-16	8.01e-19	0.00275197	9.77e-23	1.51e-20	1.66e-23	0.928416	3	3	rs62396356 0.096	1.41758e-06	0.599668	0.565123	0.0440629	0.000249658	0.0317068	0.431823	Yes
TNFRSF9	1	7975953	8003225	Cis-Reg	7.32e-07	0.000401791	0.0493686	0.0156053	0.00118008	0.00212773	0.93752	26	24	rs11584201 0.495
CCL25	19	8117650	8127534	CDS-regions	1.85e-35	2.01e-21	0.000542474	7.26e-26	5.05e-37	5.54e-35	0.944245	4	8	rs2032887 0.297; rs11260049 0.463
CXCL10	4	76942269	76944650	CDS-regions	0.000138879	4.92e-48	3.38e-47	3.28e-47	4.96e-25	8.38e-27	0.994847	1	3	rs11548618 0.038	0.748757	0.749178	0.830457	1	0.937545	0.878777	0.890725
CTSC	11	88026759	88070955	CDS-regions	2.98e-33	3.71e-14	5.95e-22	3.7e-51	7.83e-50	9.07e-37	1	3	7	rs11019400 0.095; rs217053 0.103	0.074635	0.122524	0.213615	0.12165	0.14581	0.32081	0.550238
IL10RB	21	34638662	34682492	CDS-regions	2.52e-07	0.000253922	0.200987	4.76e-08	1.59e-07	8.37e-06	1	2	4	rs8178528 0.424
MIA	19	41277552	41283395	CDS-regions	2.73e-40	5.91e-38	1.22e-26	2.36e-38	1.02e-37	1.09e-43	NA	0	2	rs12609370 0.112
LAIR2	19	55009099	55021897	CDS-regions	9.55e-19	1.91e-20	2.72e-20	2.82e-30	9.7e-34	4.89e-33	NA	0	6	rs73063845 0.081; rs148035216 0.044; rs73070113 0.062; rs59342471 0.124; rs146104402 0.013; rs10409178 0.064
CD27	12	6554032	6560884	CDS-regions	8.11e-23	1.25e-21	2.55e-21	1.65e-21	4.31e-24	3.63e-29	NA	0	3	rs7970260 0.469; rs79655535 0.176; rs25680 0.149
ULBP2	6	150263135	150270371	CDS-regions	3.59e-15	3.68e-10	2.82e-10	9.88e-19	6.03e-20	2.46e-25	NA	0	2	rs1951931 0.112; rs11964763 0.412; rs4343924 0.13
CXCL5	4	74861358	74864496	CDS-regions	9.05e-27	9.05e-27	9.05e-27	9.05e-27	9.05e-27	2.68e-25	NA	0	1	rs425535 0.092
LTA	6	31539830	31542101	CDS-regions	4.38e-06	0.0225405	1.32e-28	2.86e-17	1.01e-19	4.99e-20	NA	0	4	rs2229092 0.028	0.000623736	0.000104095	0.029288	0.0171429	0.00133279	0.00794531
CST5	20	23856571	23860387	CDS-regions	4.79e-19	4.79e-19	4.79e-19	4.79e-19	4.79e-19	6.28e-20	NA	0	1	rs4813509 0.532	0.221201	0.221201	0.221201	0.221201	0.221201	0.133239	NA
CRNN	1	152381718	152386739	CDS-regions	1.28e-18	1.28e-18	1.28e-18	1.28e-18	1.28e-18	1.16e-19	NA	0	2	rs10494275 0.093
TCL1A	14	96176303	96180533	CDS-regions	1.4e-08	2.21e-08	0.538241	1.09e-05	1.4e-07	6.52e-10	NA	0	2	rs10131341 0.348	0.0731907	0.0525767	0.251608	0.169054	0.139028	0.494496	NA
